# Supplementary material for: Delta-8 Tetrahydrocannabinol Product Impurities
Source: MDPI journal article supplement (doi:10.3390/molecules27206924), 2022-10-15

## **Delta-8 Tetrahydrocannabinol Product Impurities**

Colleen L. Ray <sup>1</sup>, Madison P. Bylo <sup>1</sup>, Jonny Pesacaglia <sup>1</sup>, James A. Gawenis <sup>2</sup> and  
C. Michael Greenlief <sup>1,\*</sup>

<sup>1</sup> Department of Chemistry, University of Missouri, 601 S. College Avenue, Columbia,  
MO 65211, USA

<sup>2</sup> Sweetwater Science Laboratories, Glasgow, MO 65264, USA

\* Corresponding Author: Email address: greenliefm@missouri.edu (C.M. Greenlief)

### Contents

800 MHz <sup>1</sup>H NMR spectra of each sample listed in Table 1 of the manuscript.

MS/MS spectra of each sample listed in Table 4 of the manuscript

Sample 1

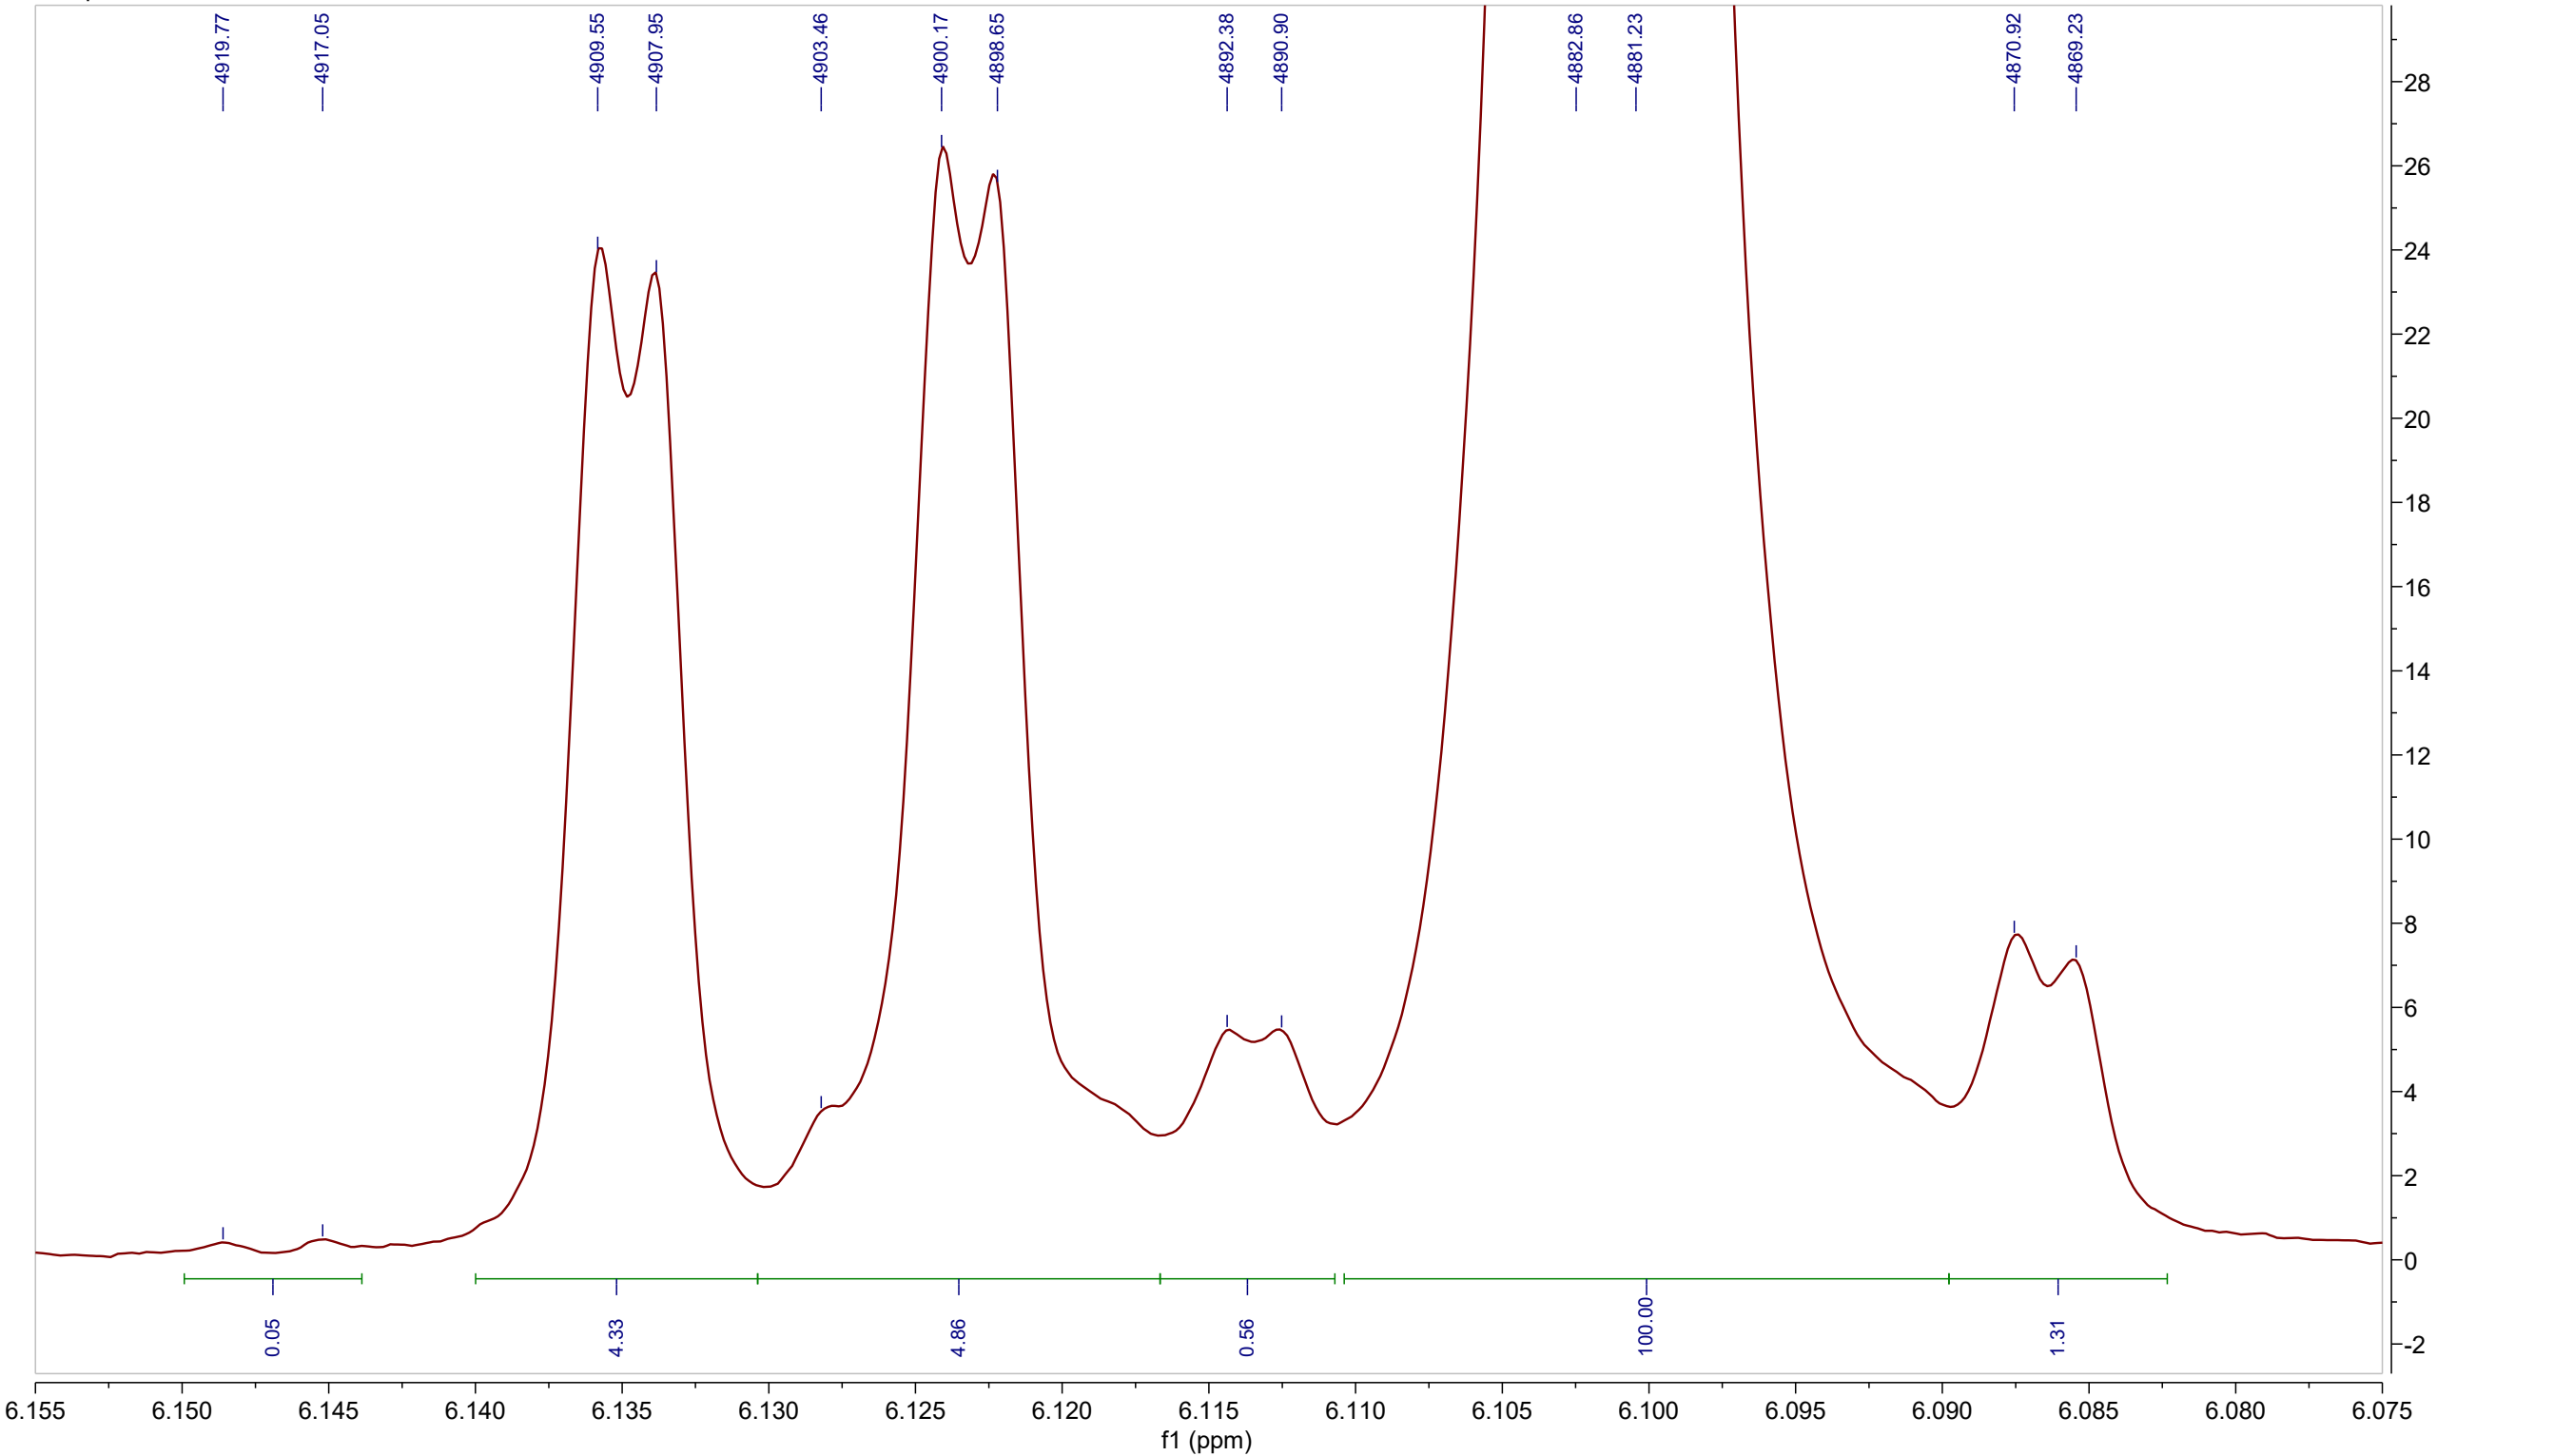

Sample 2

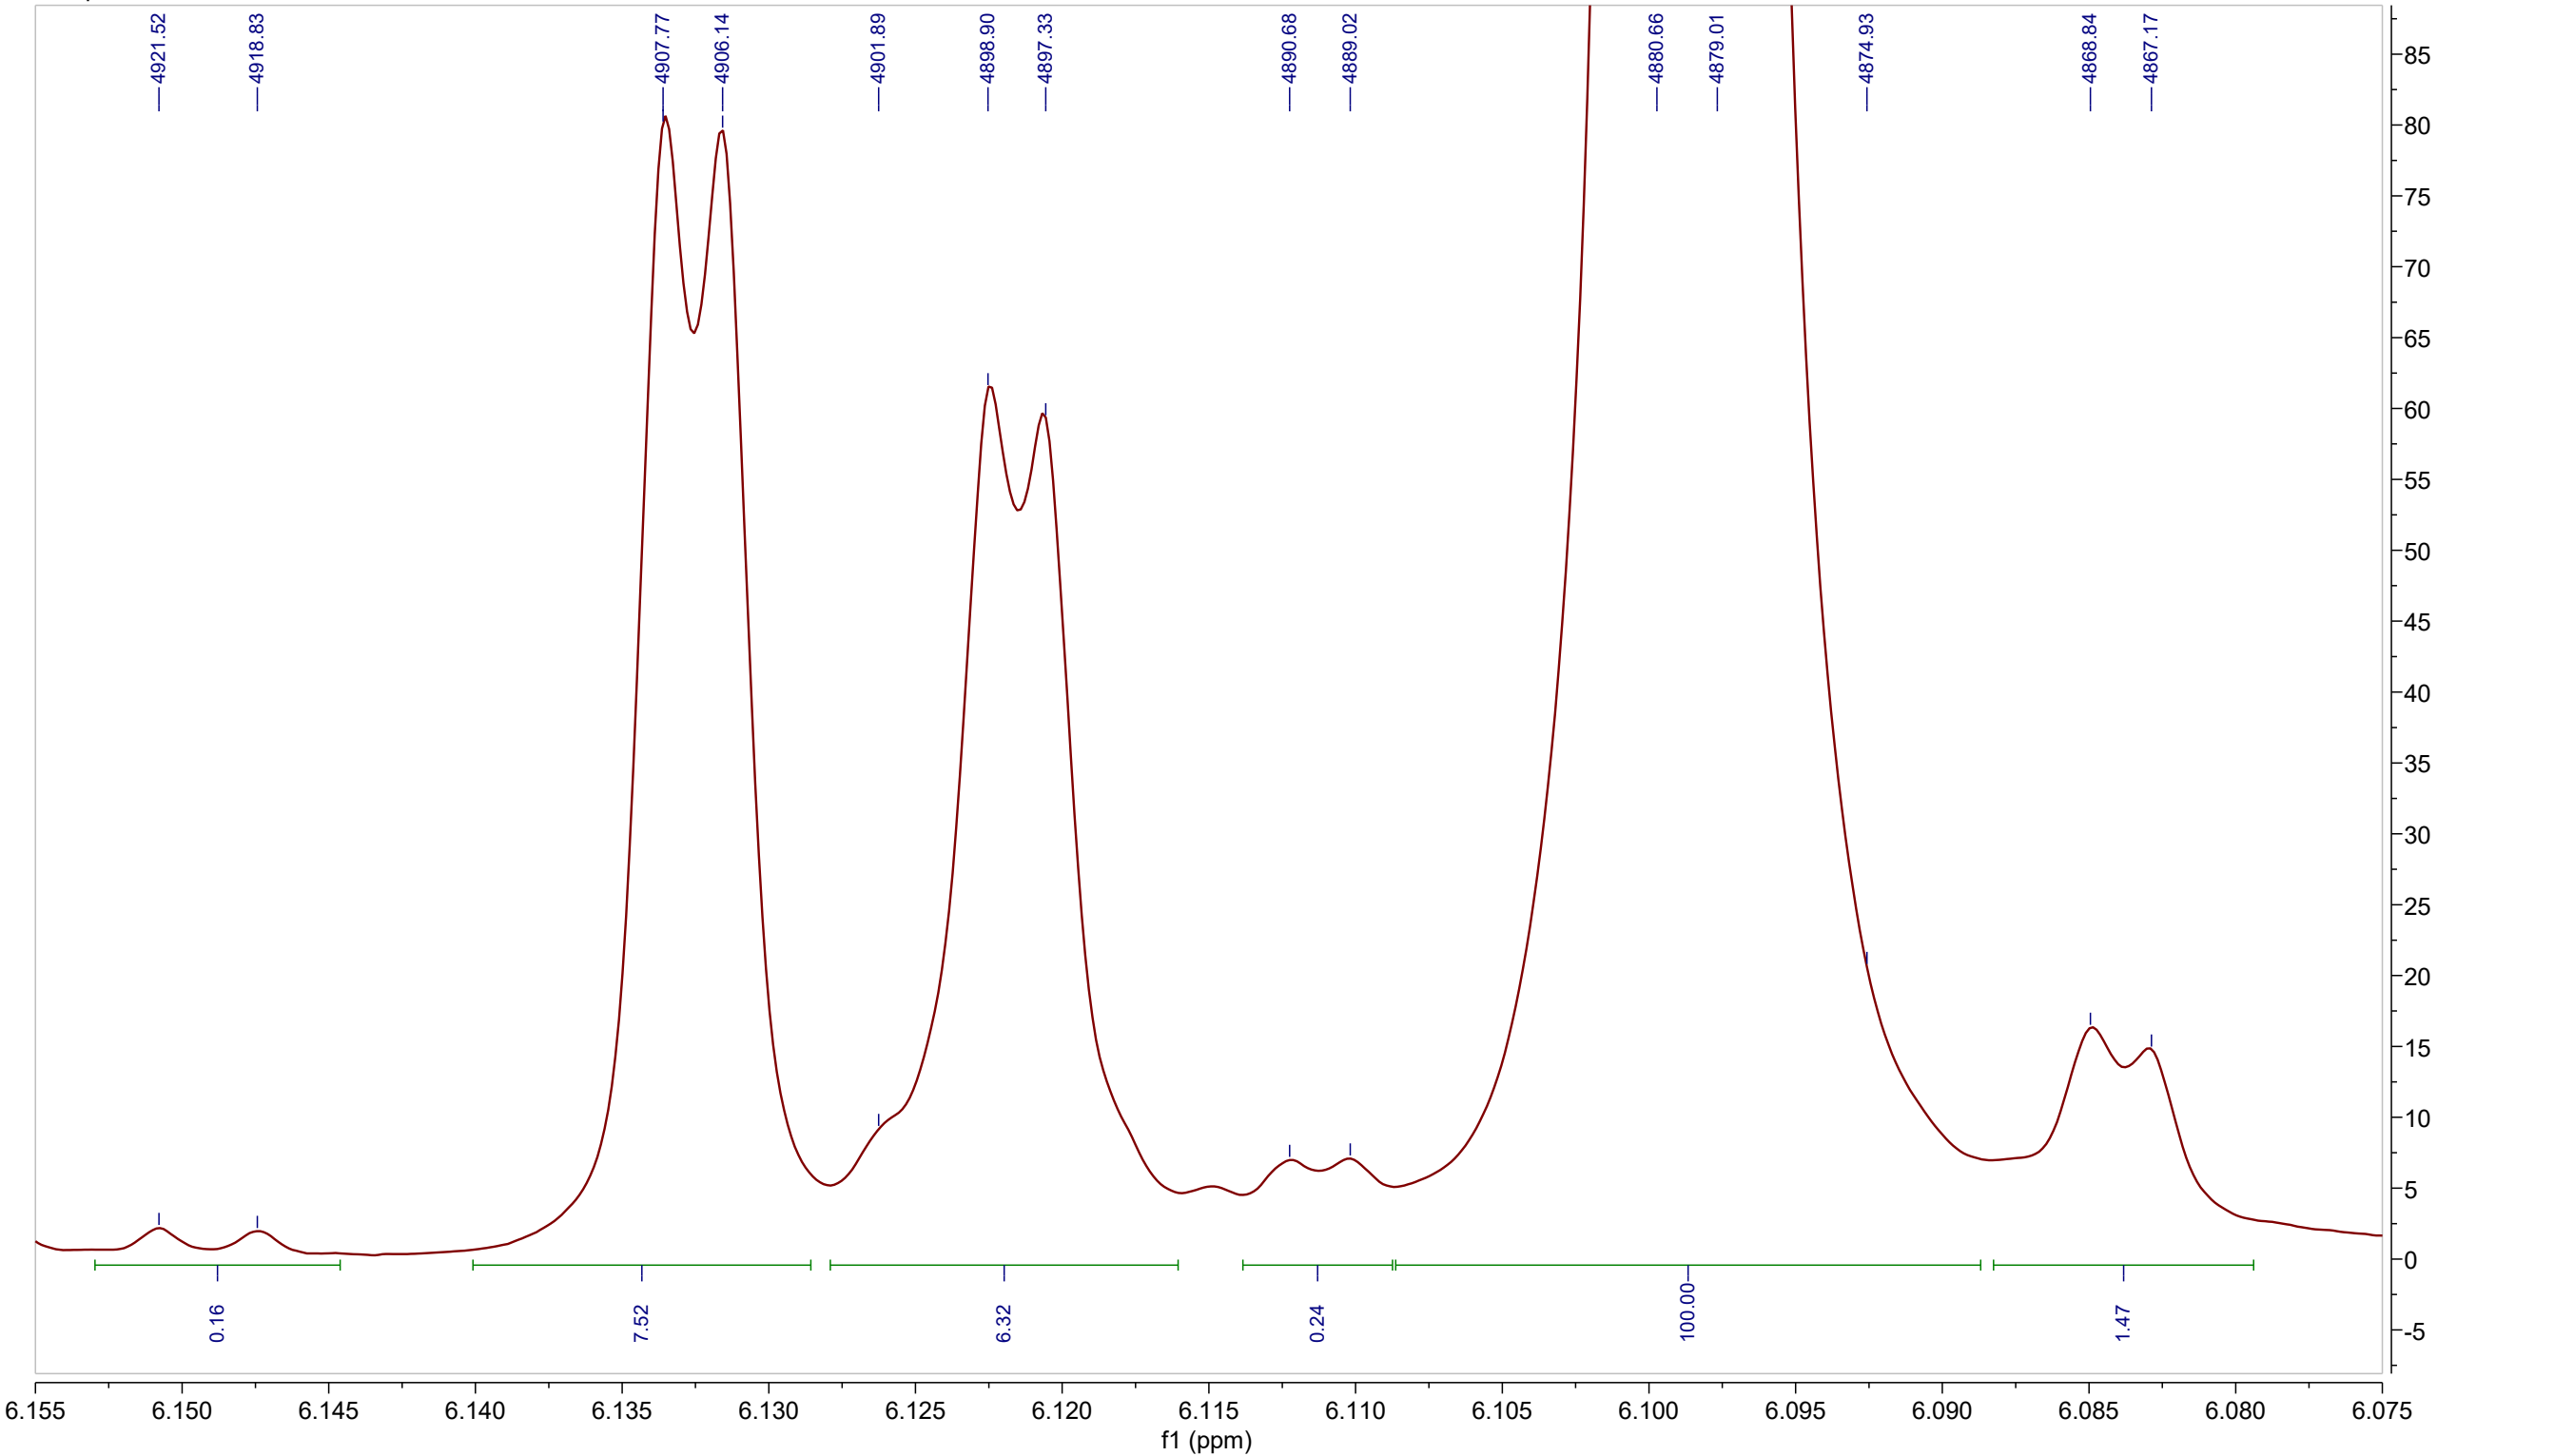

Sample 3

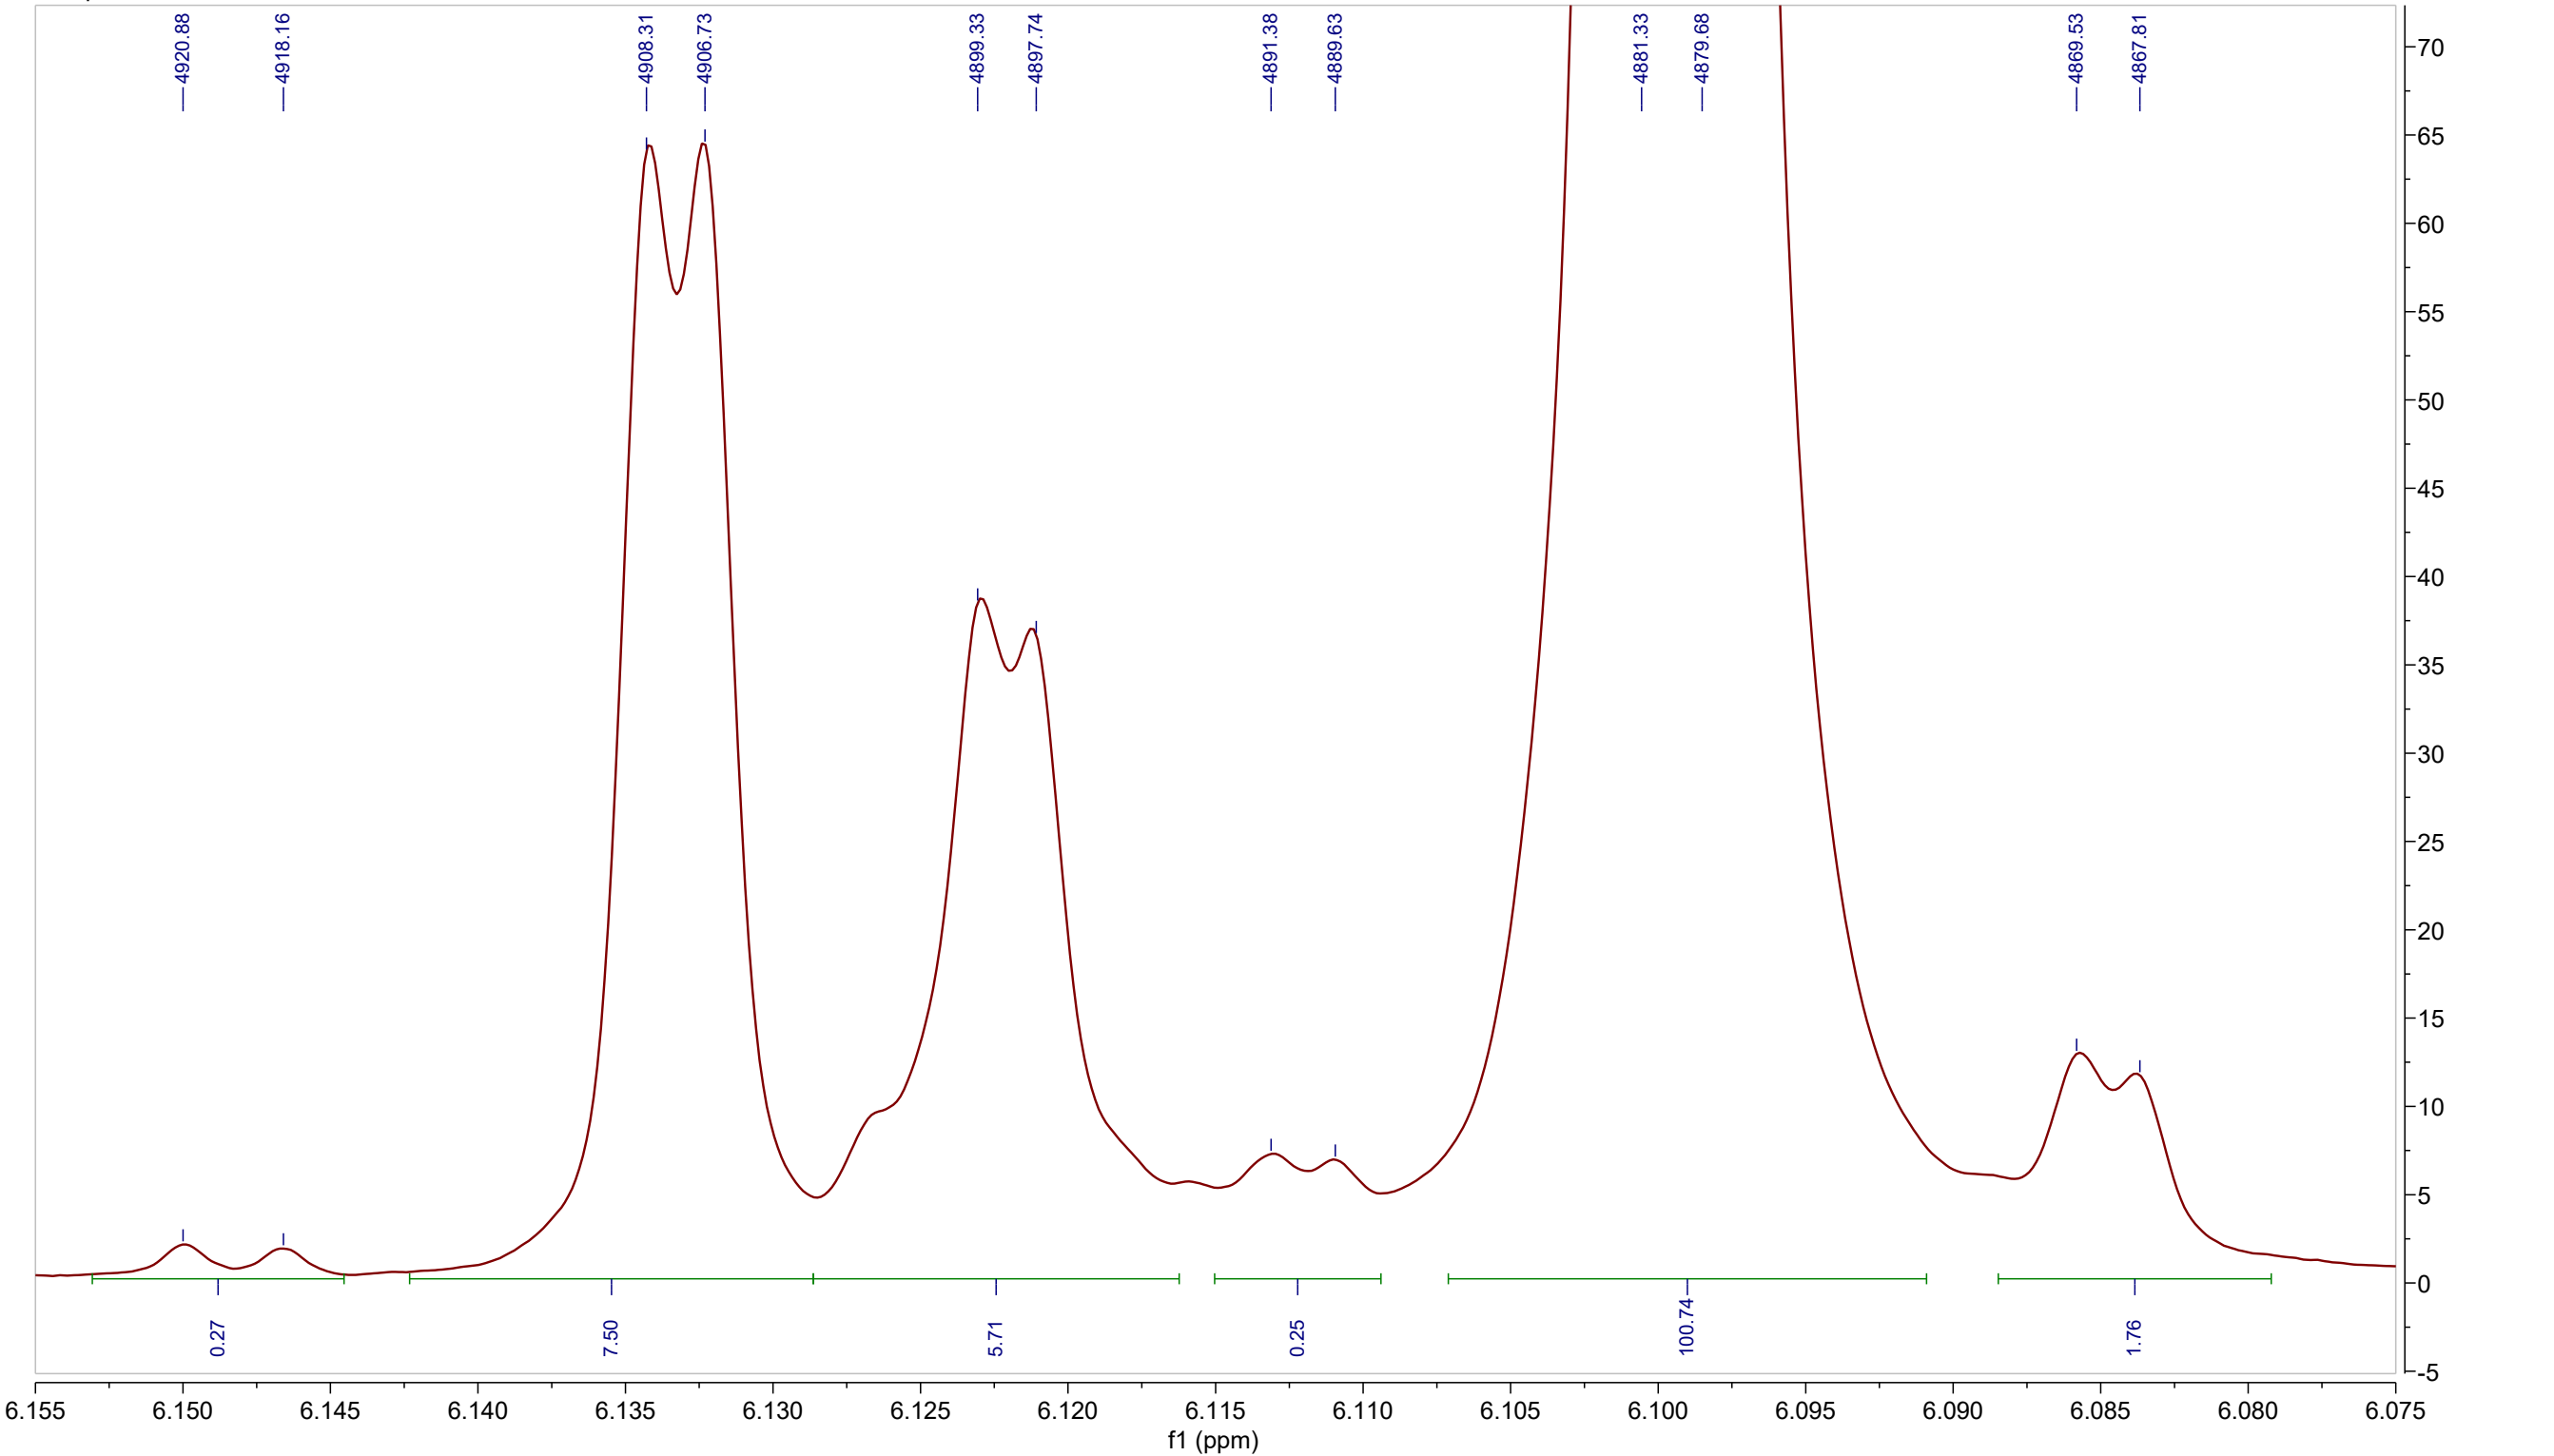

Sample 4

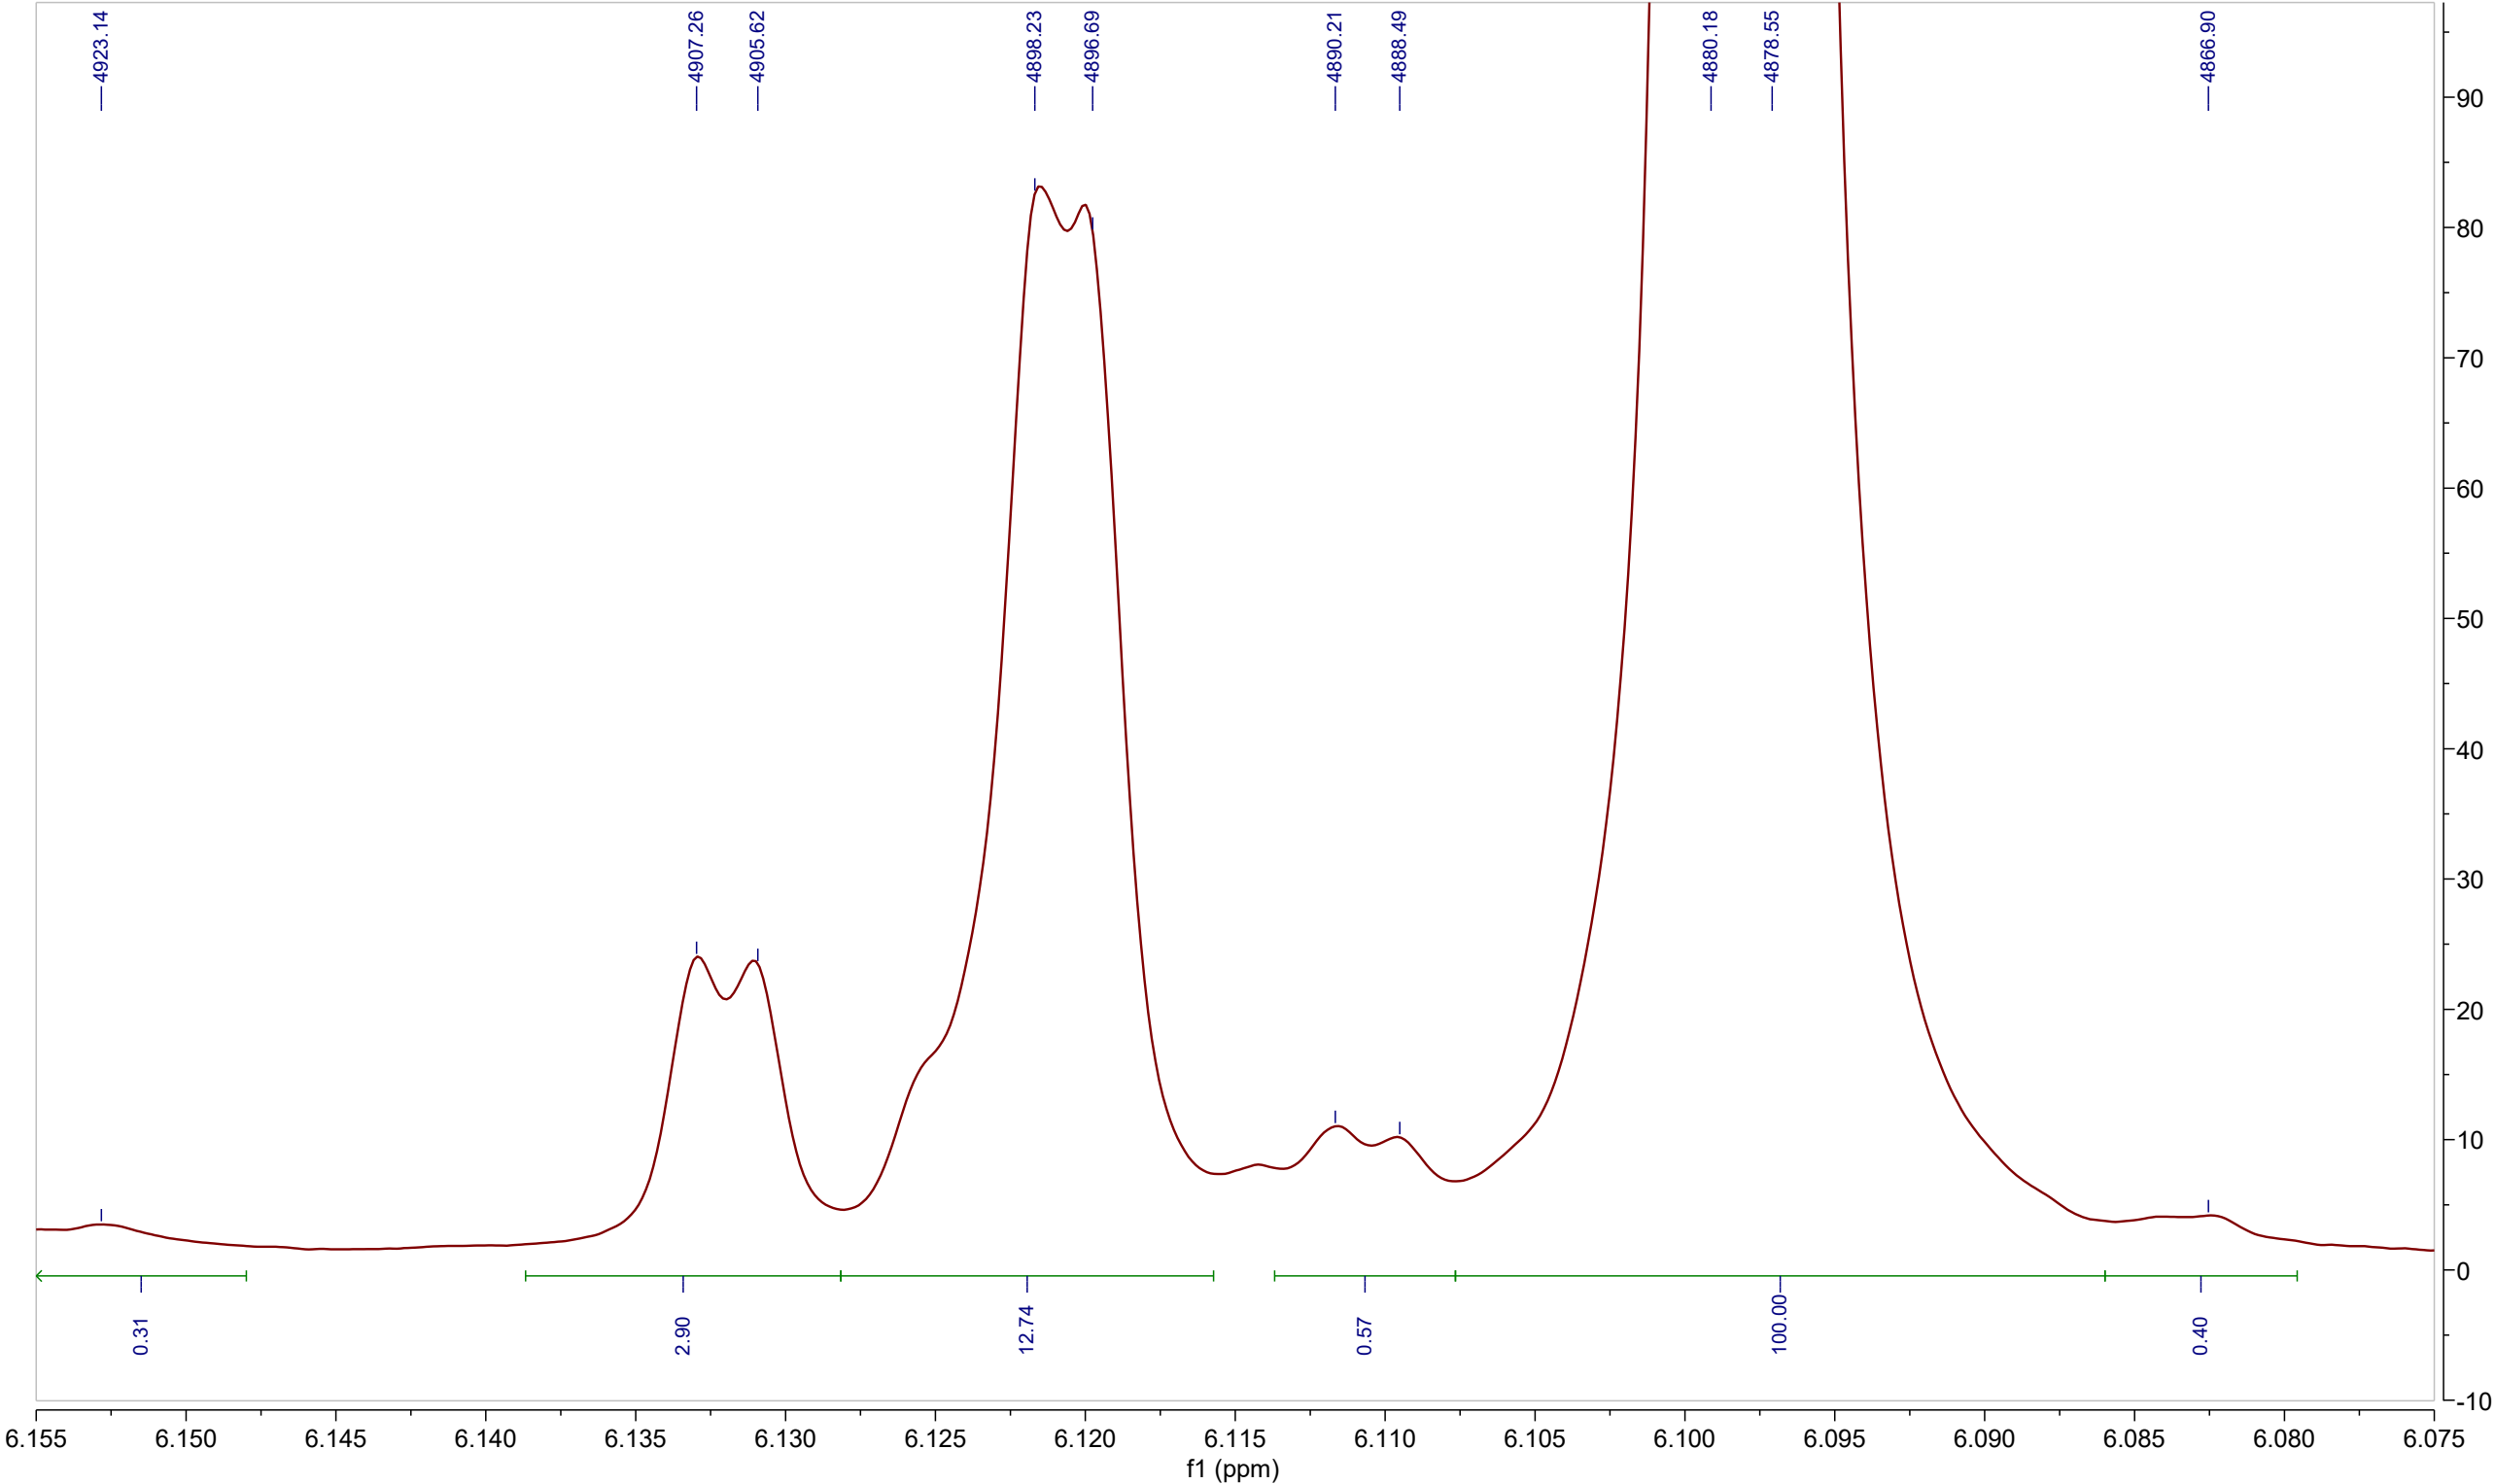

Sample 5

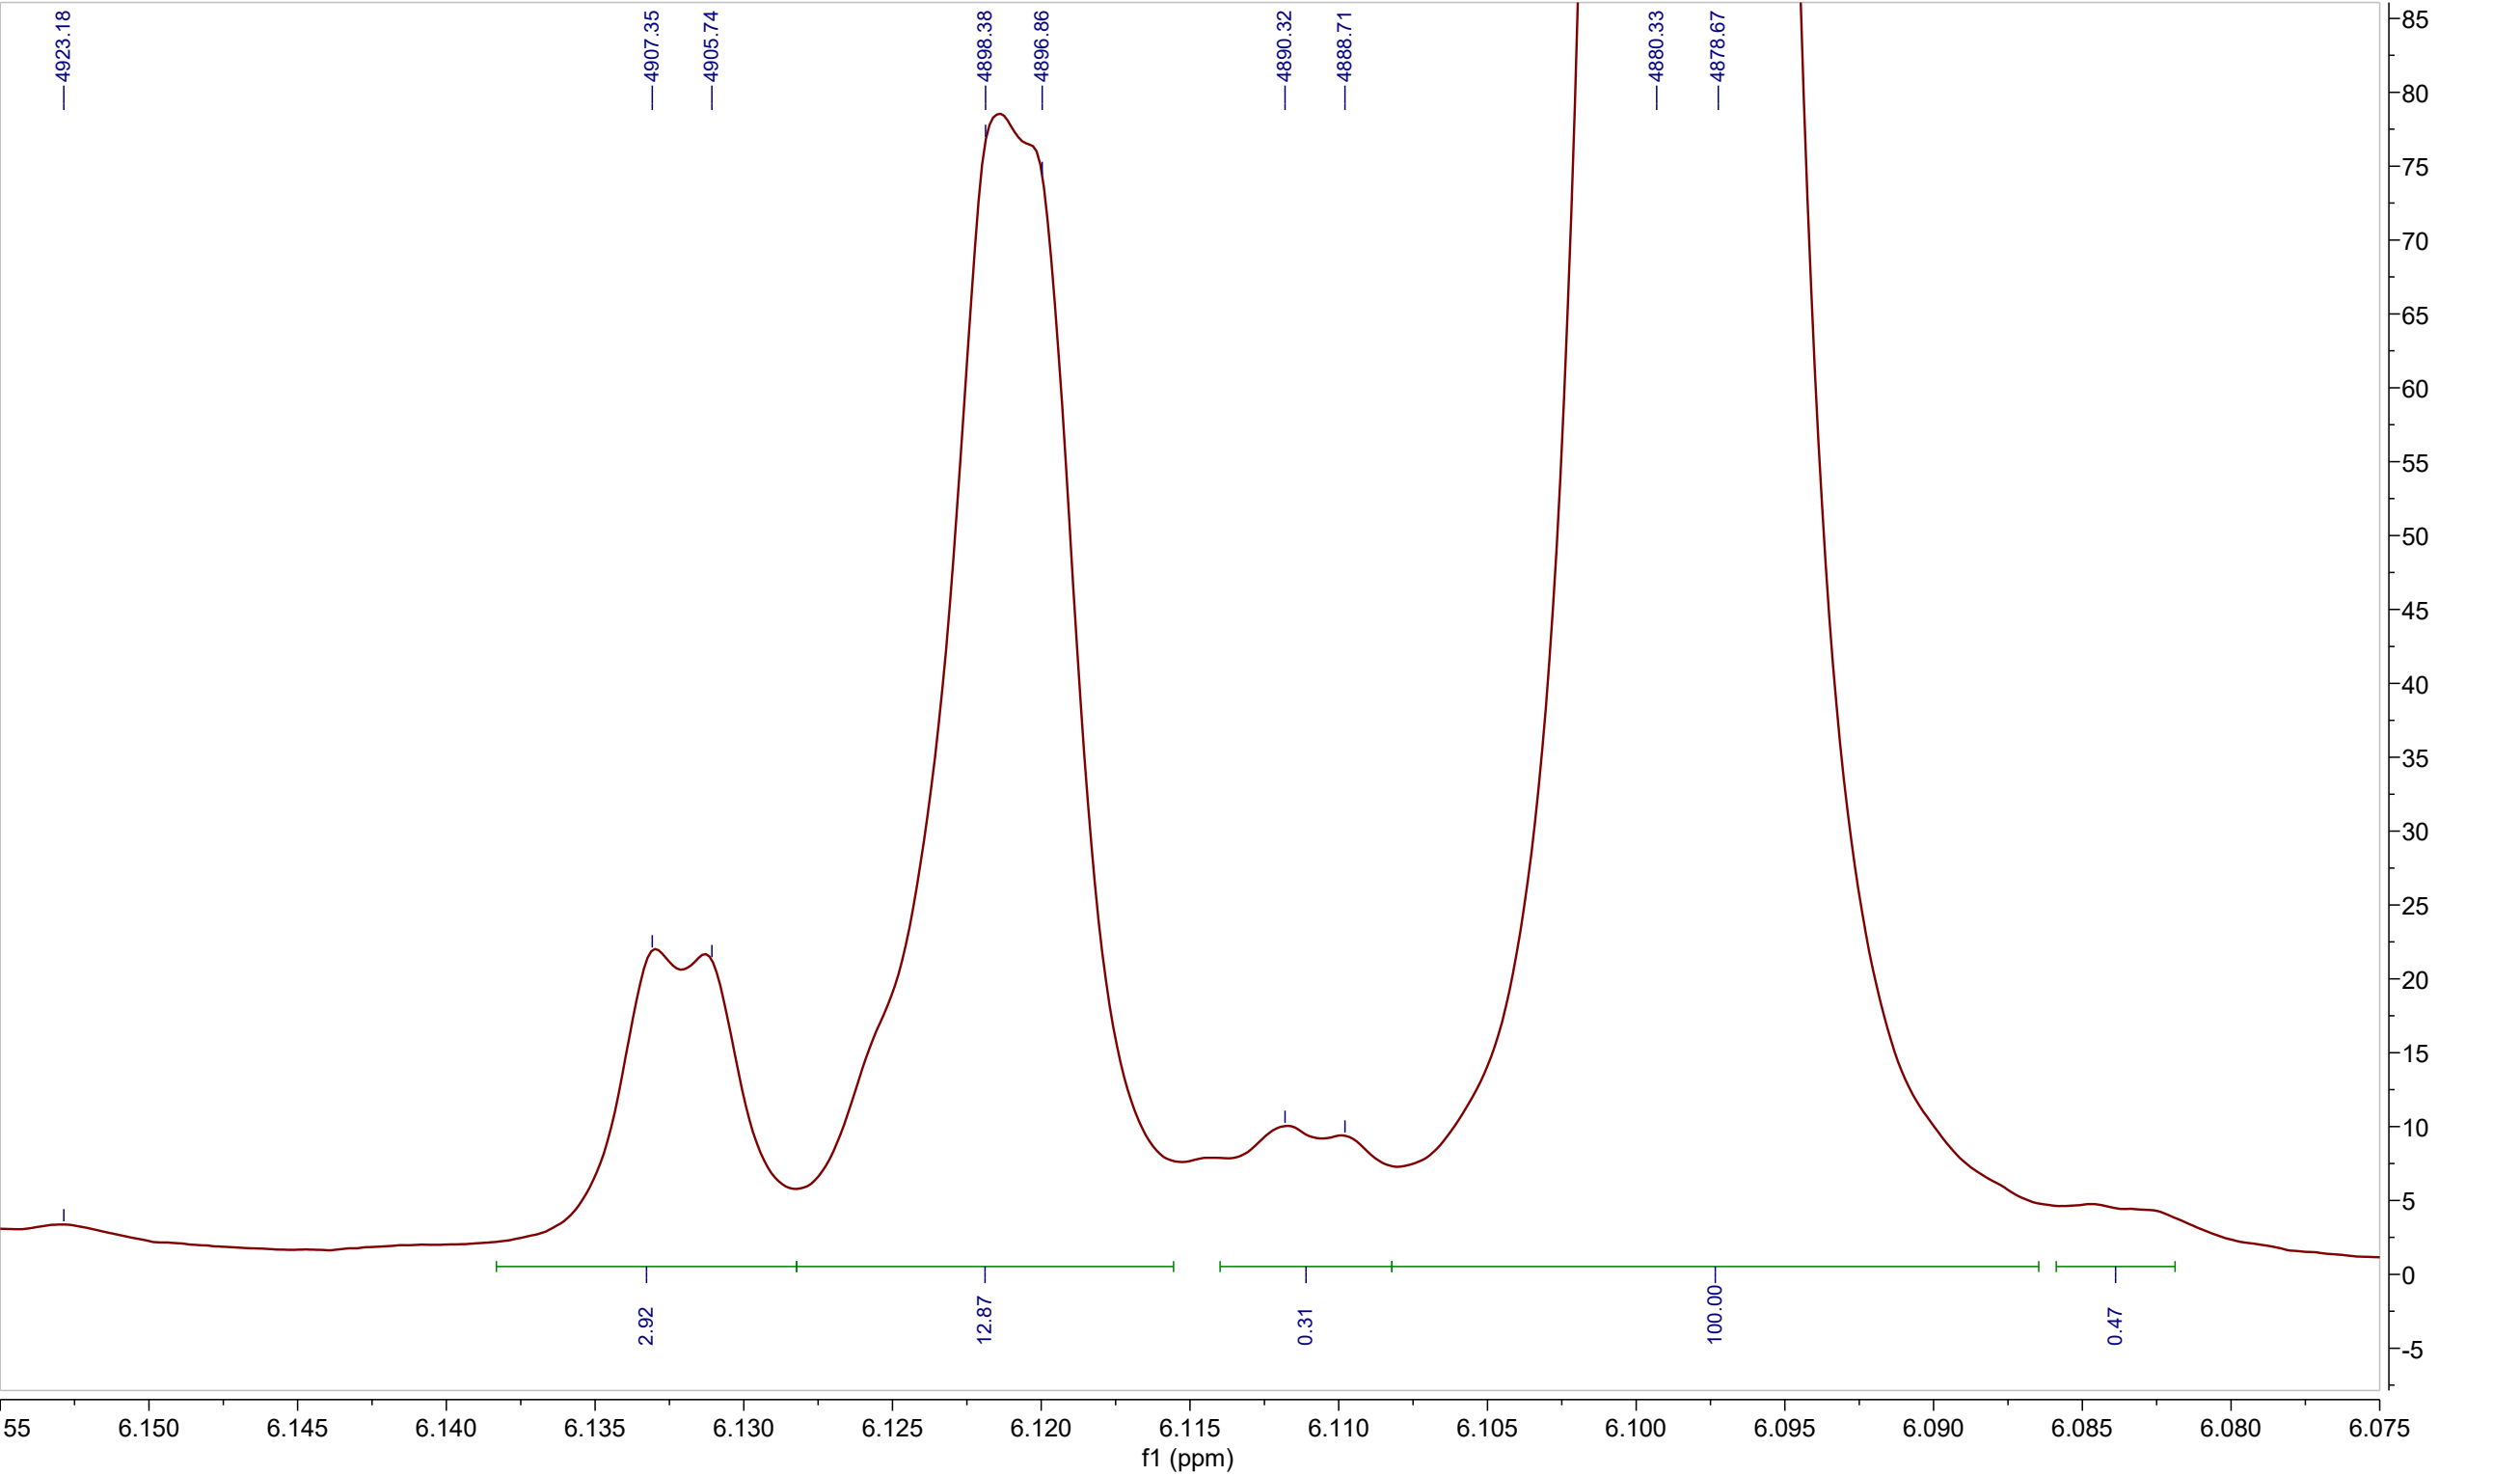

Sample 6

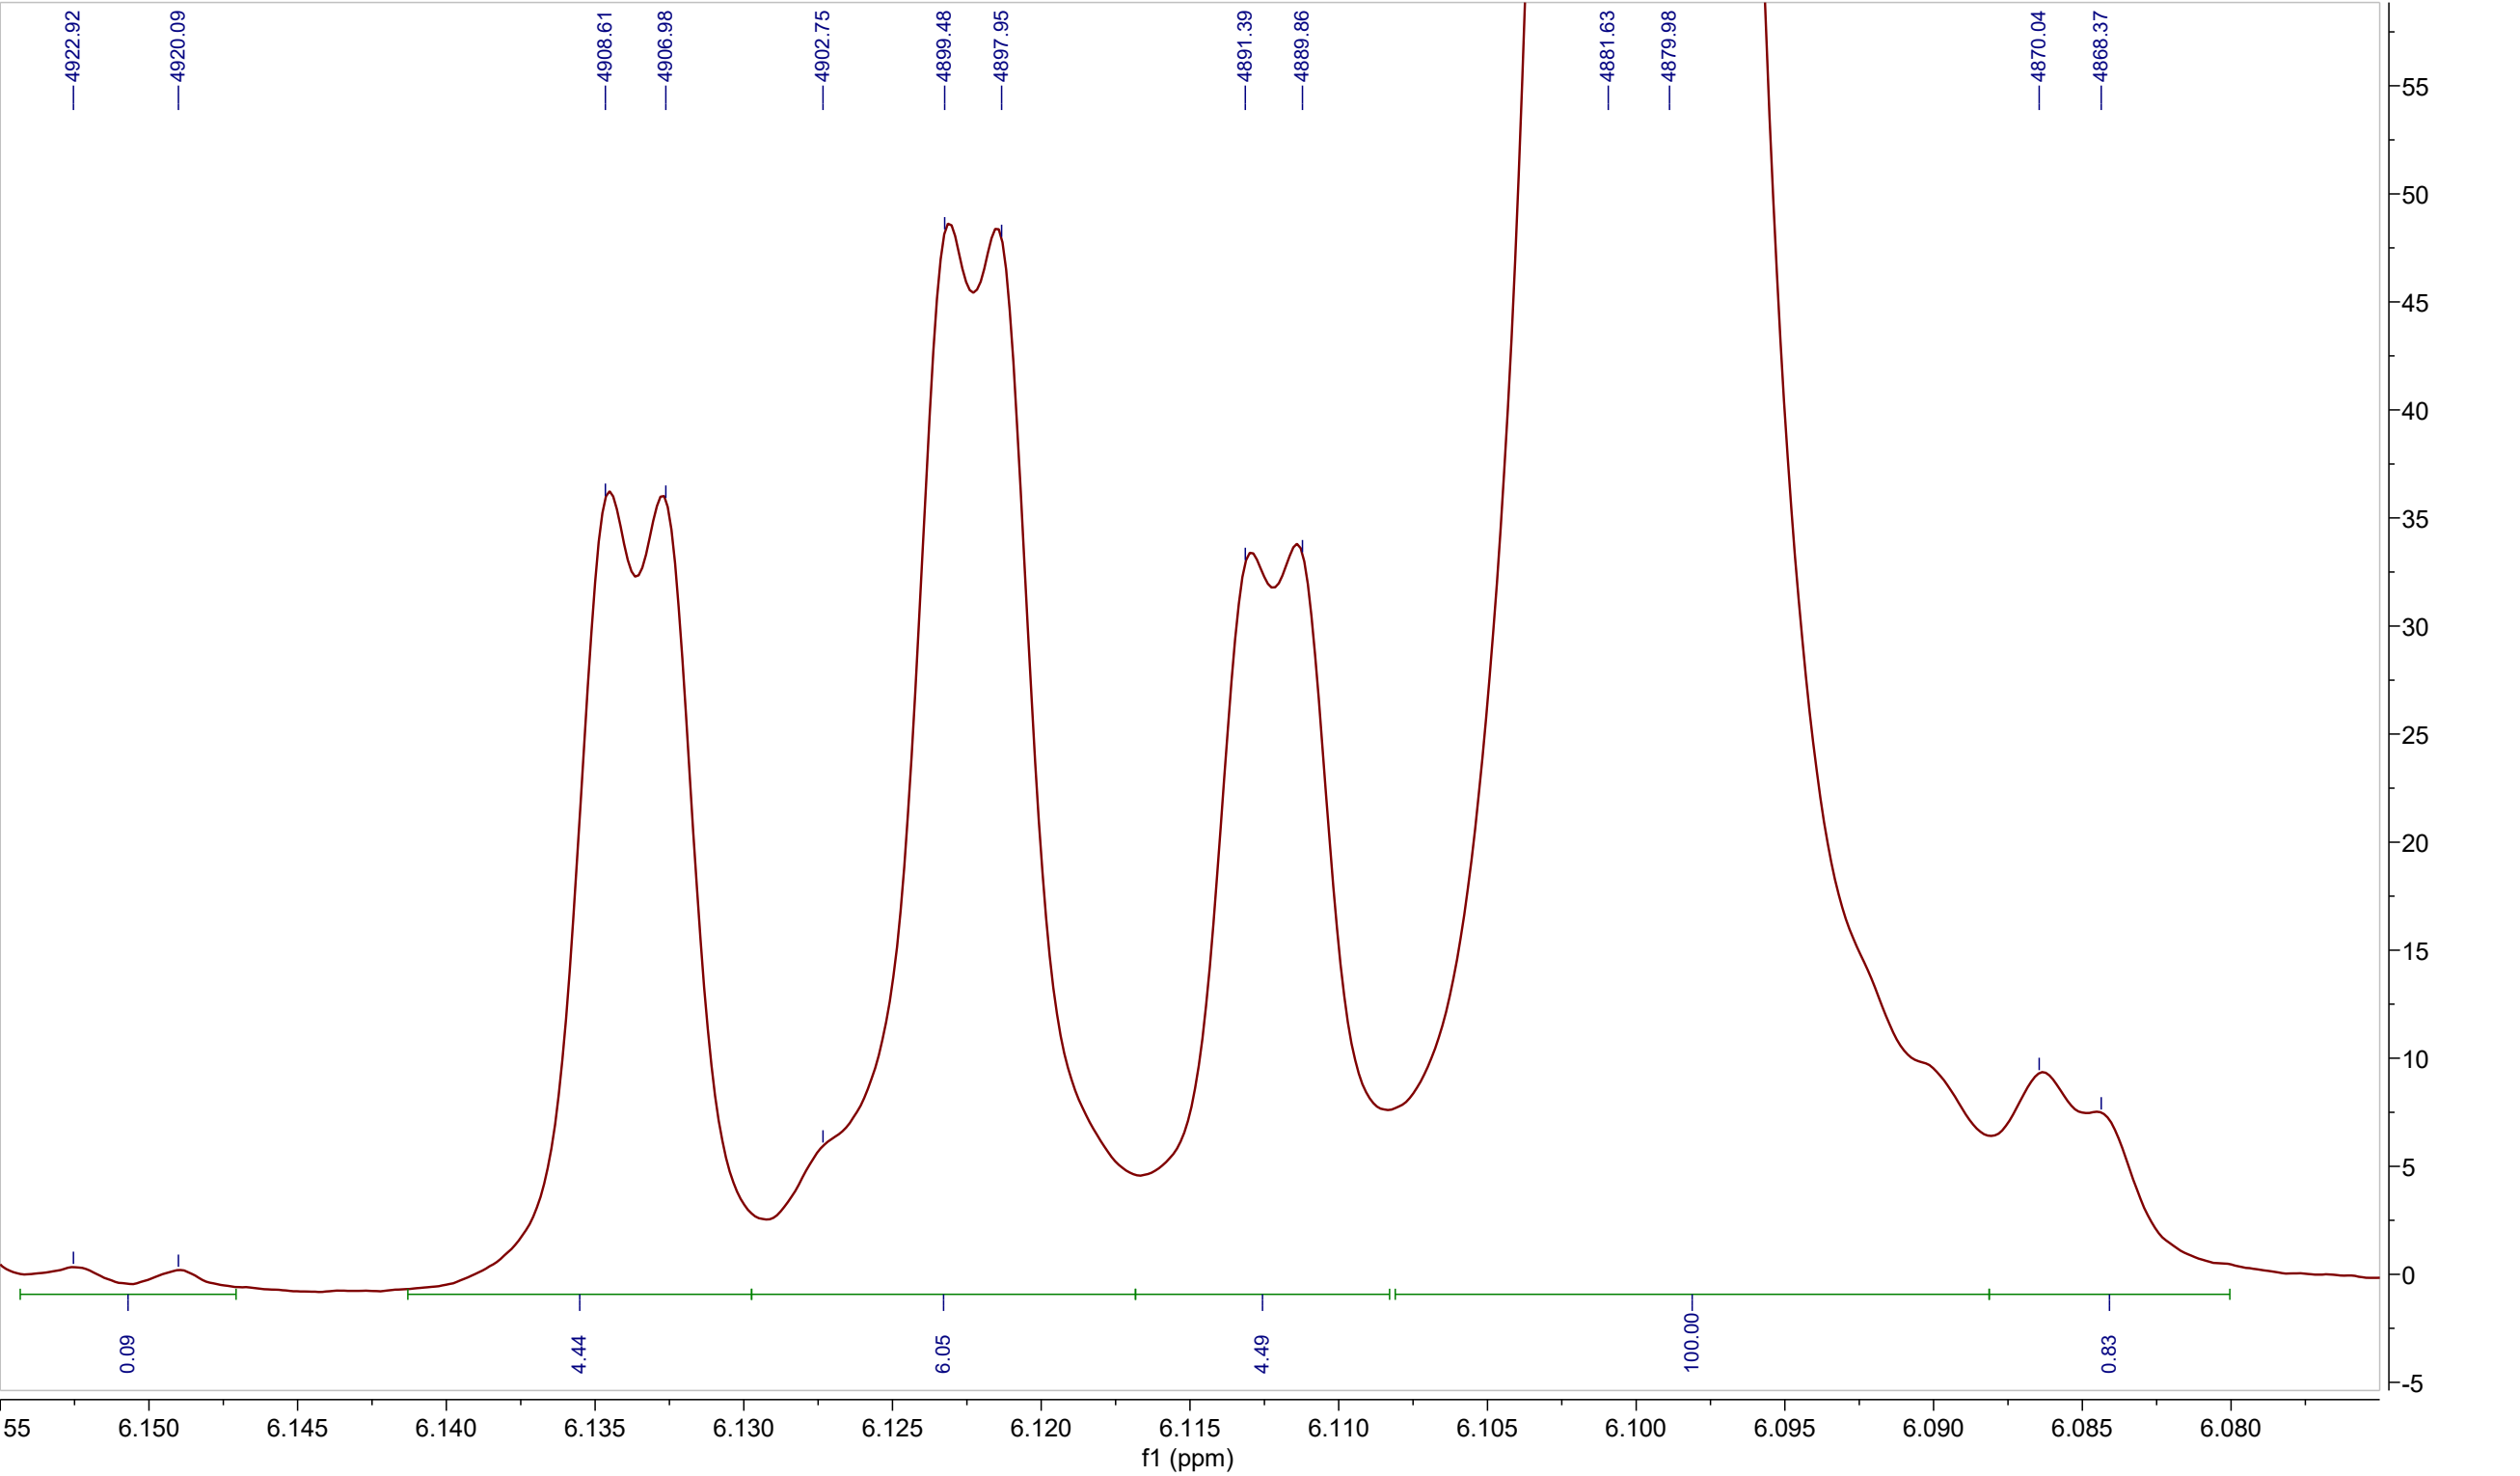

Sample 7

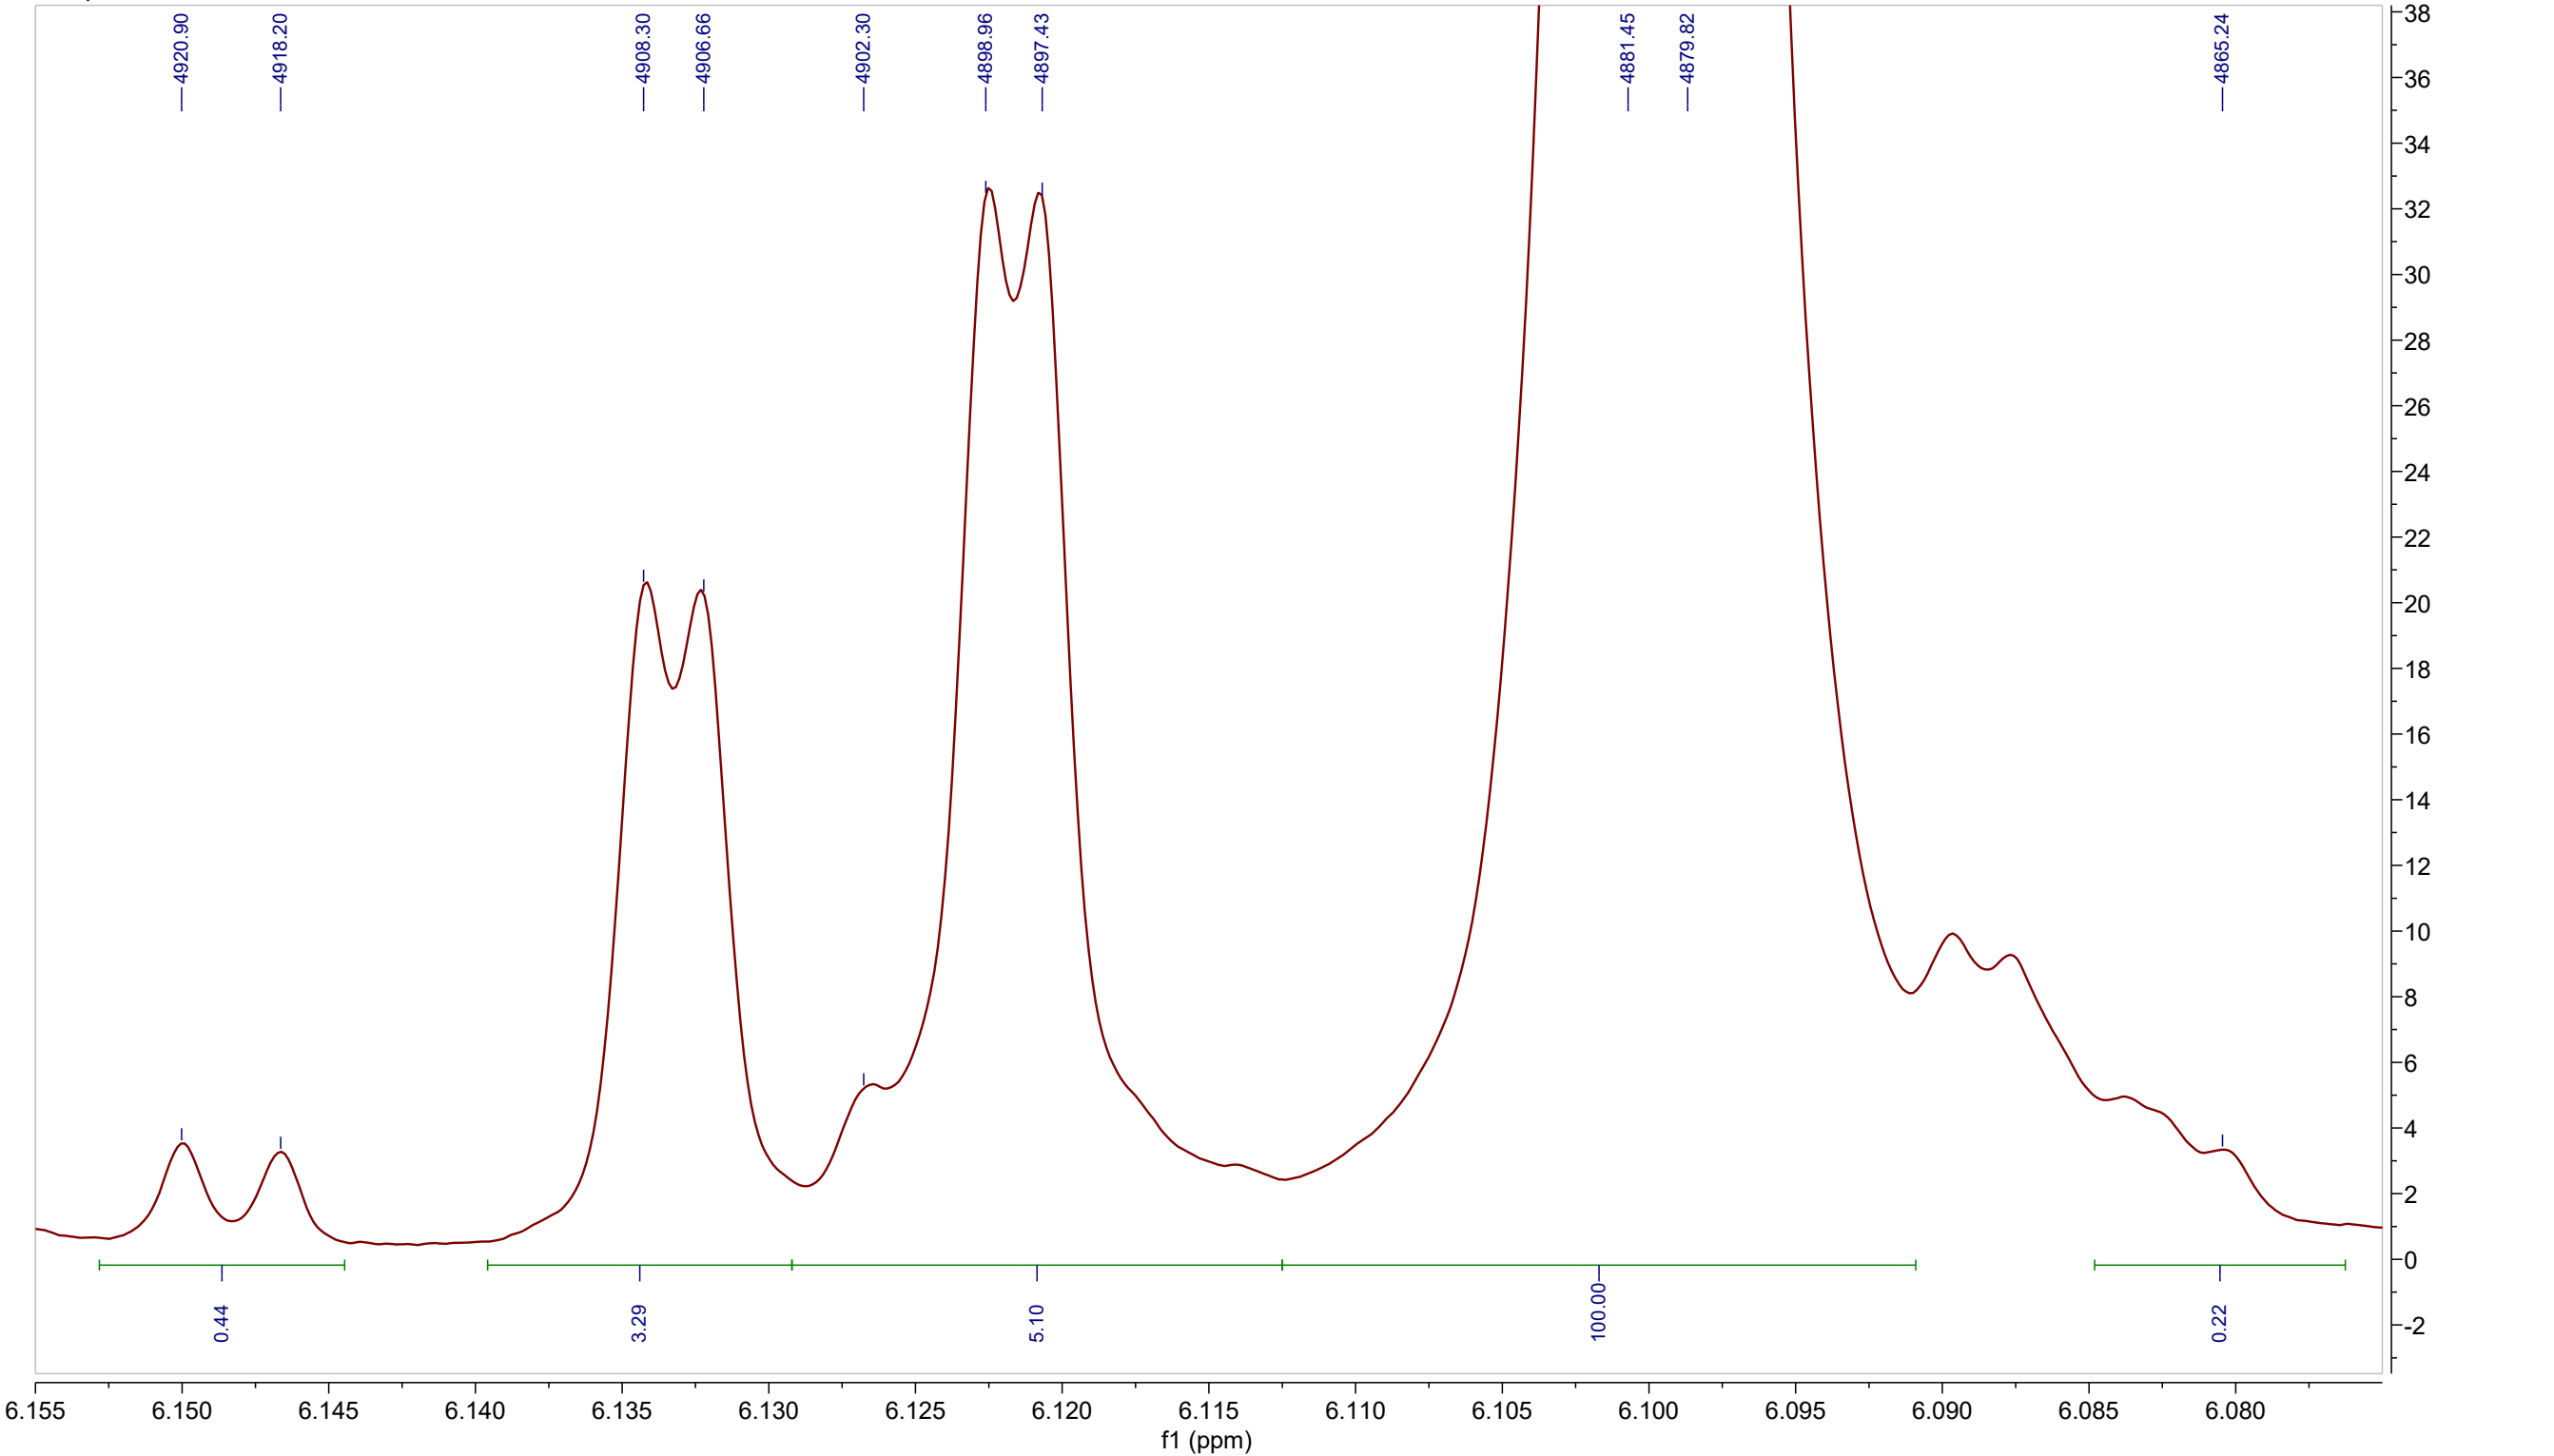



Sample 8

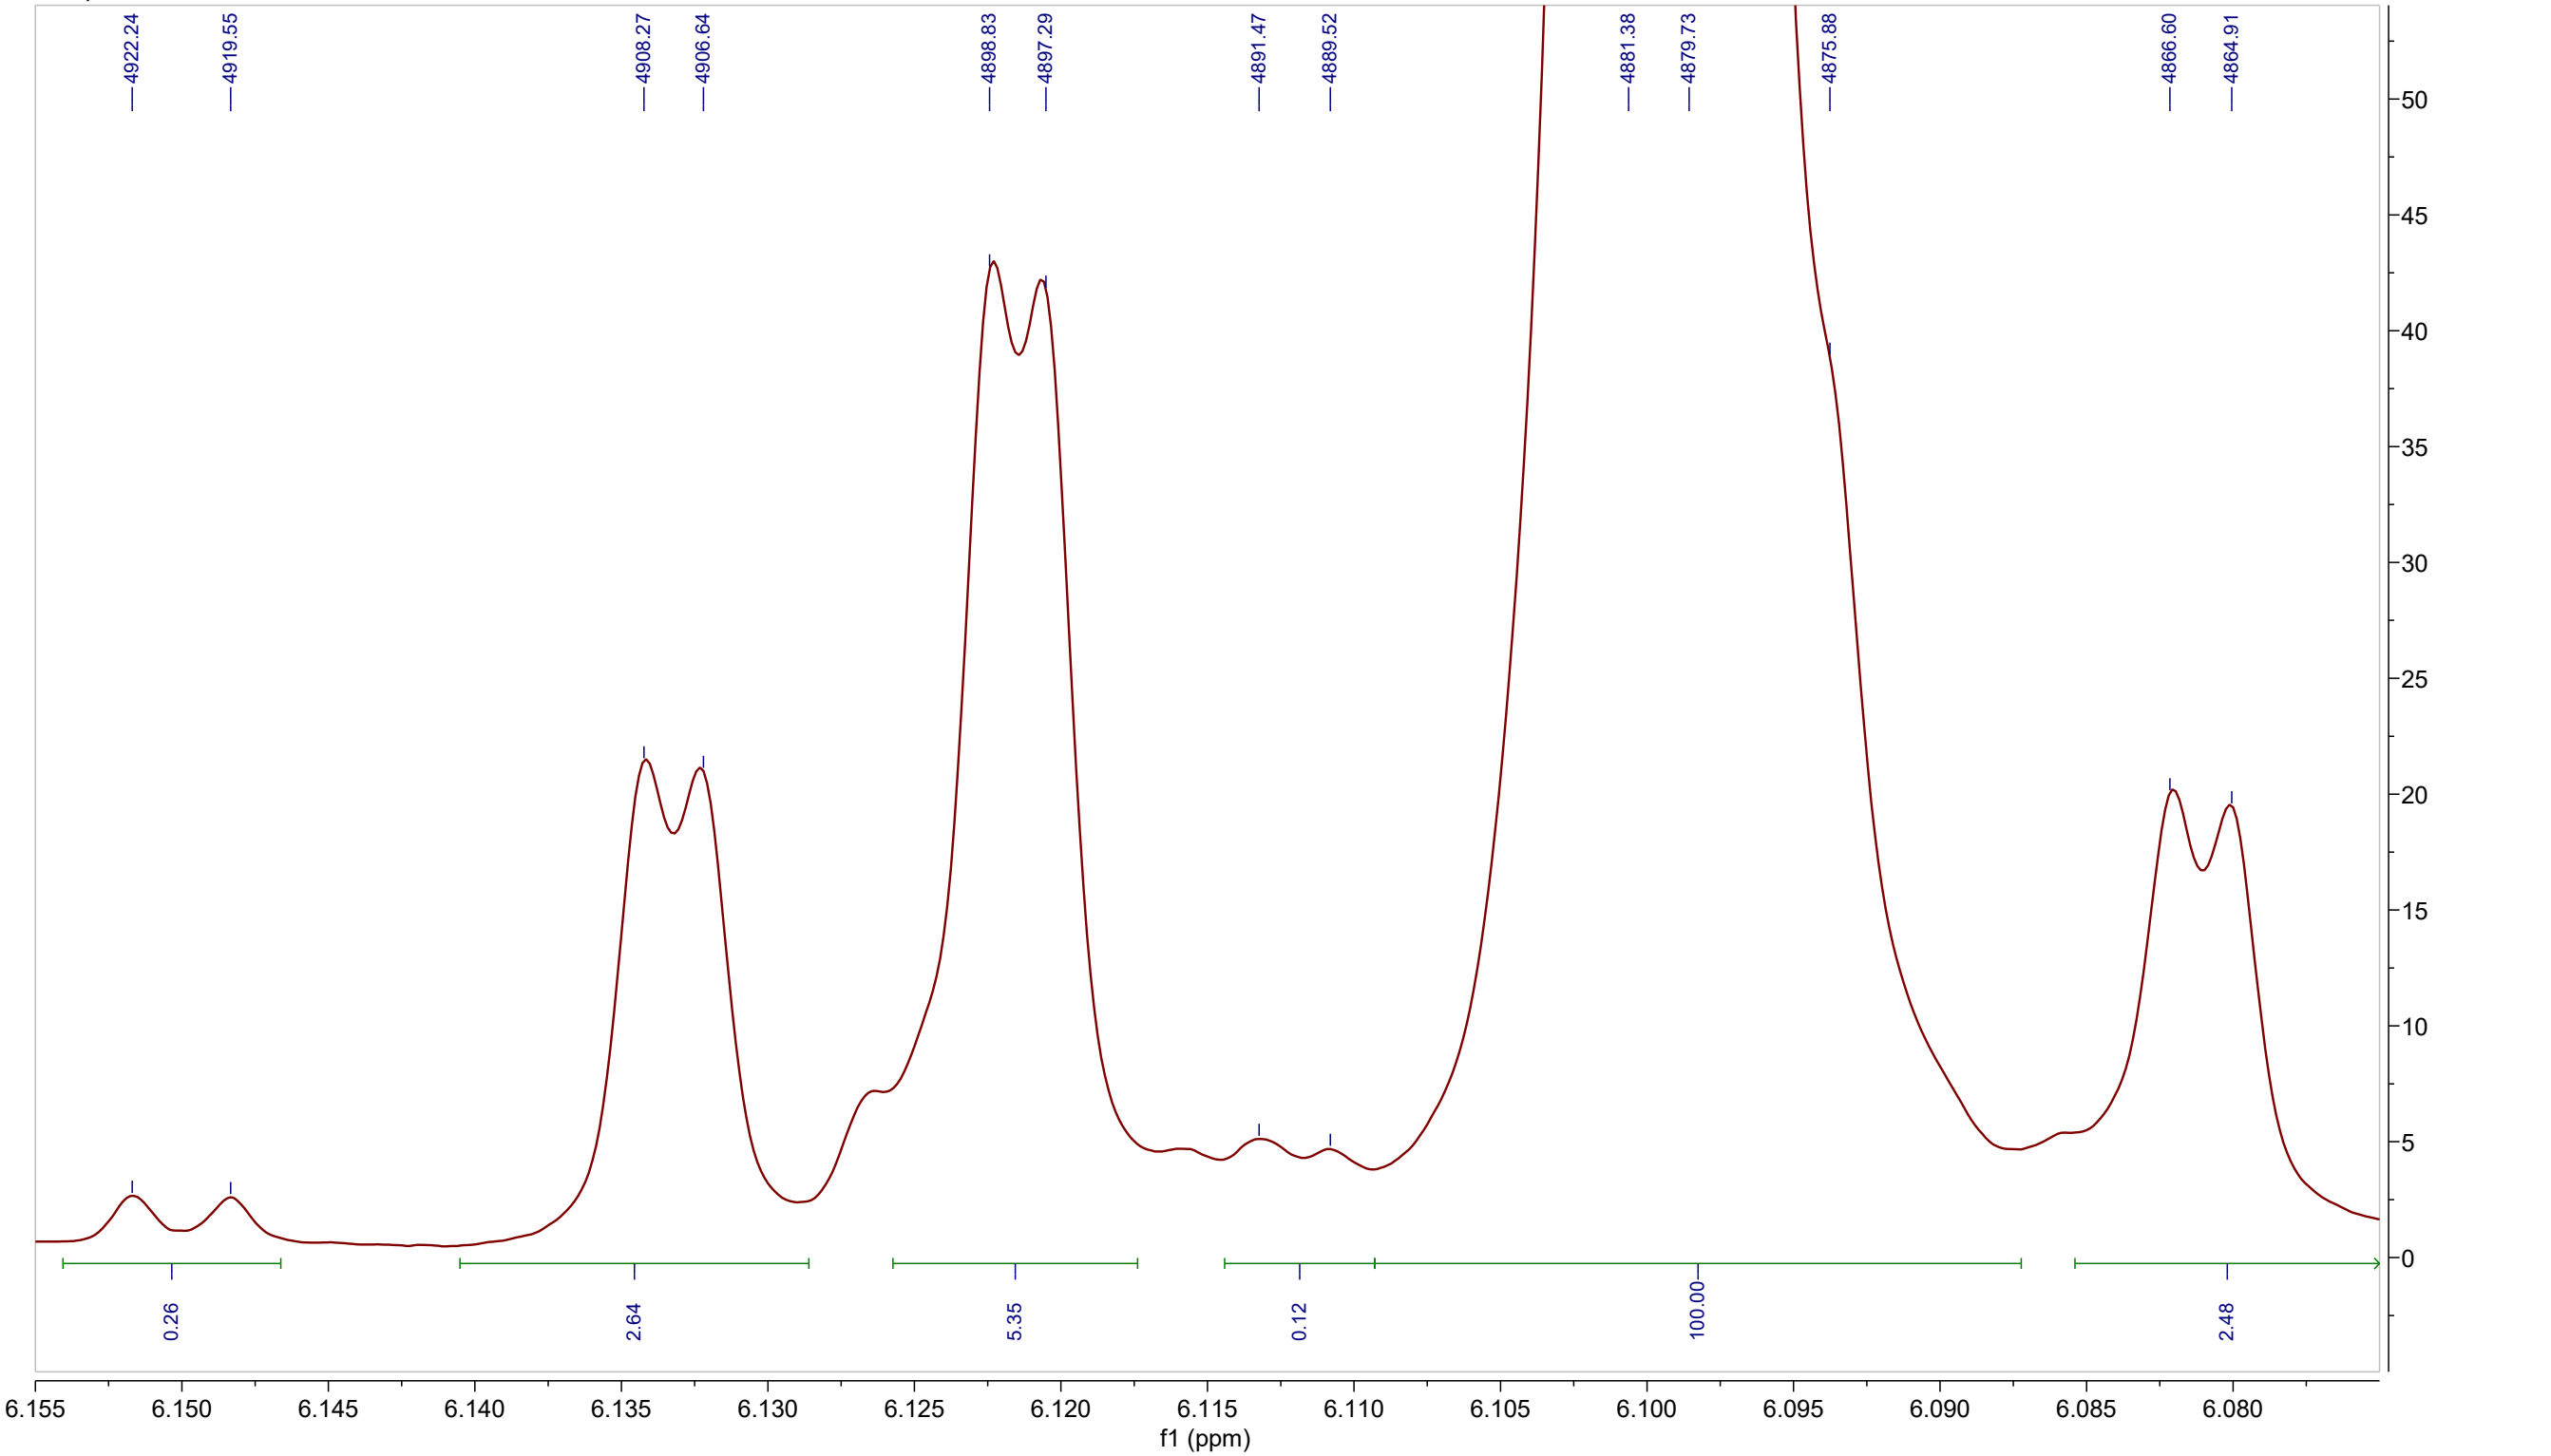

Sample 9

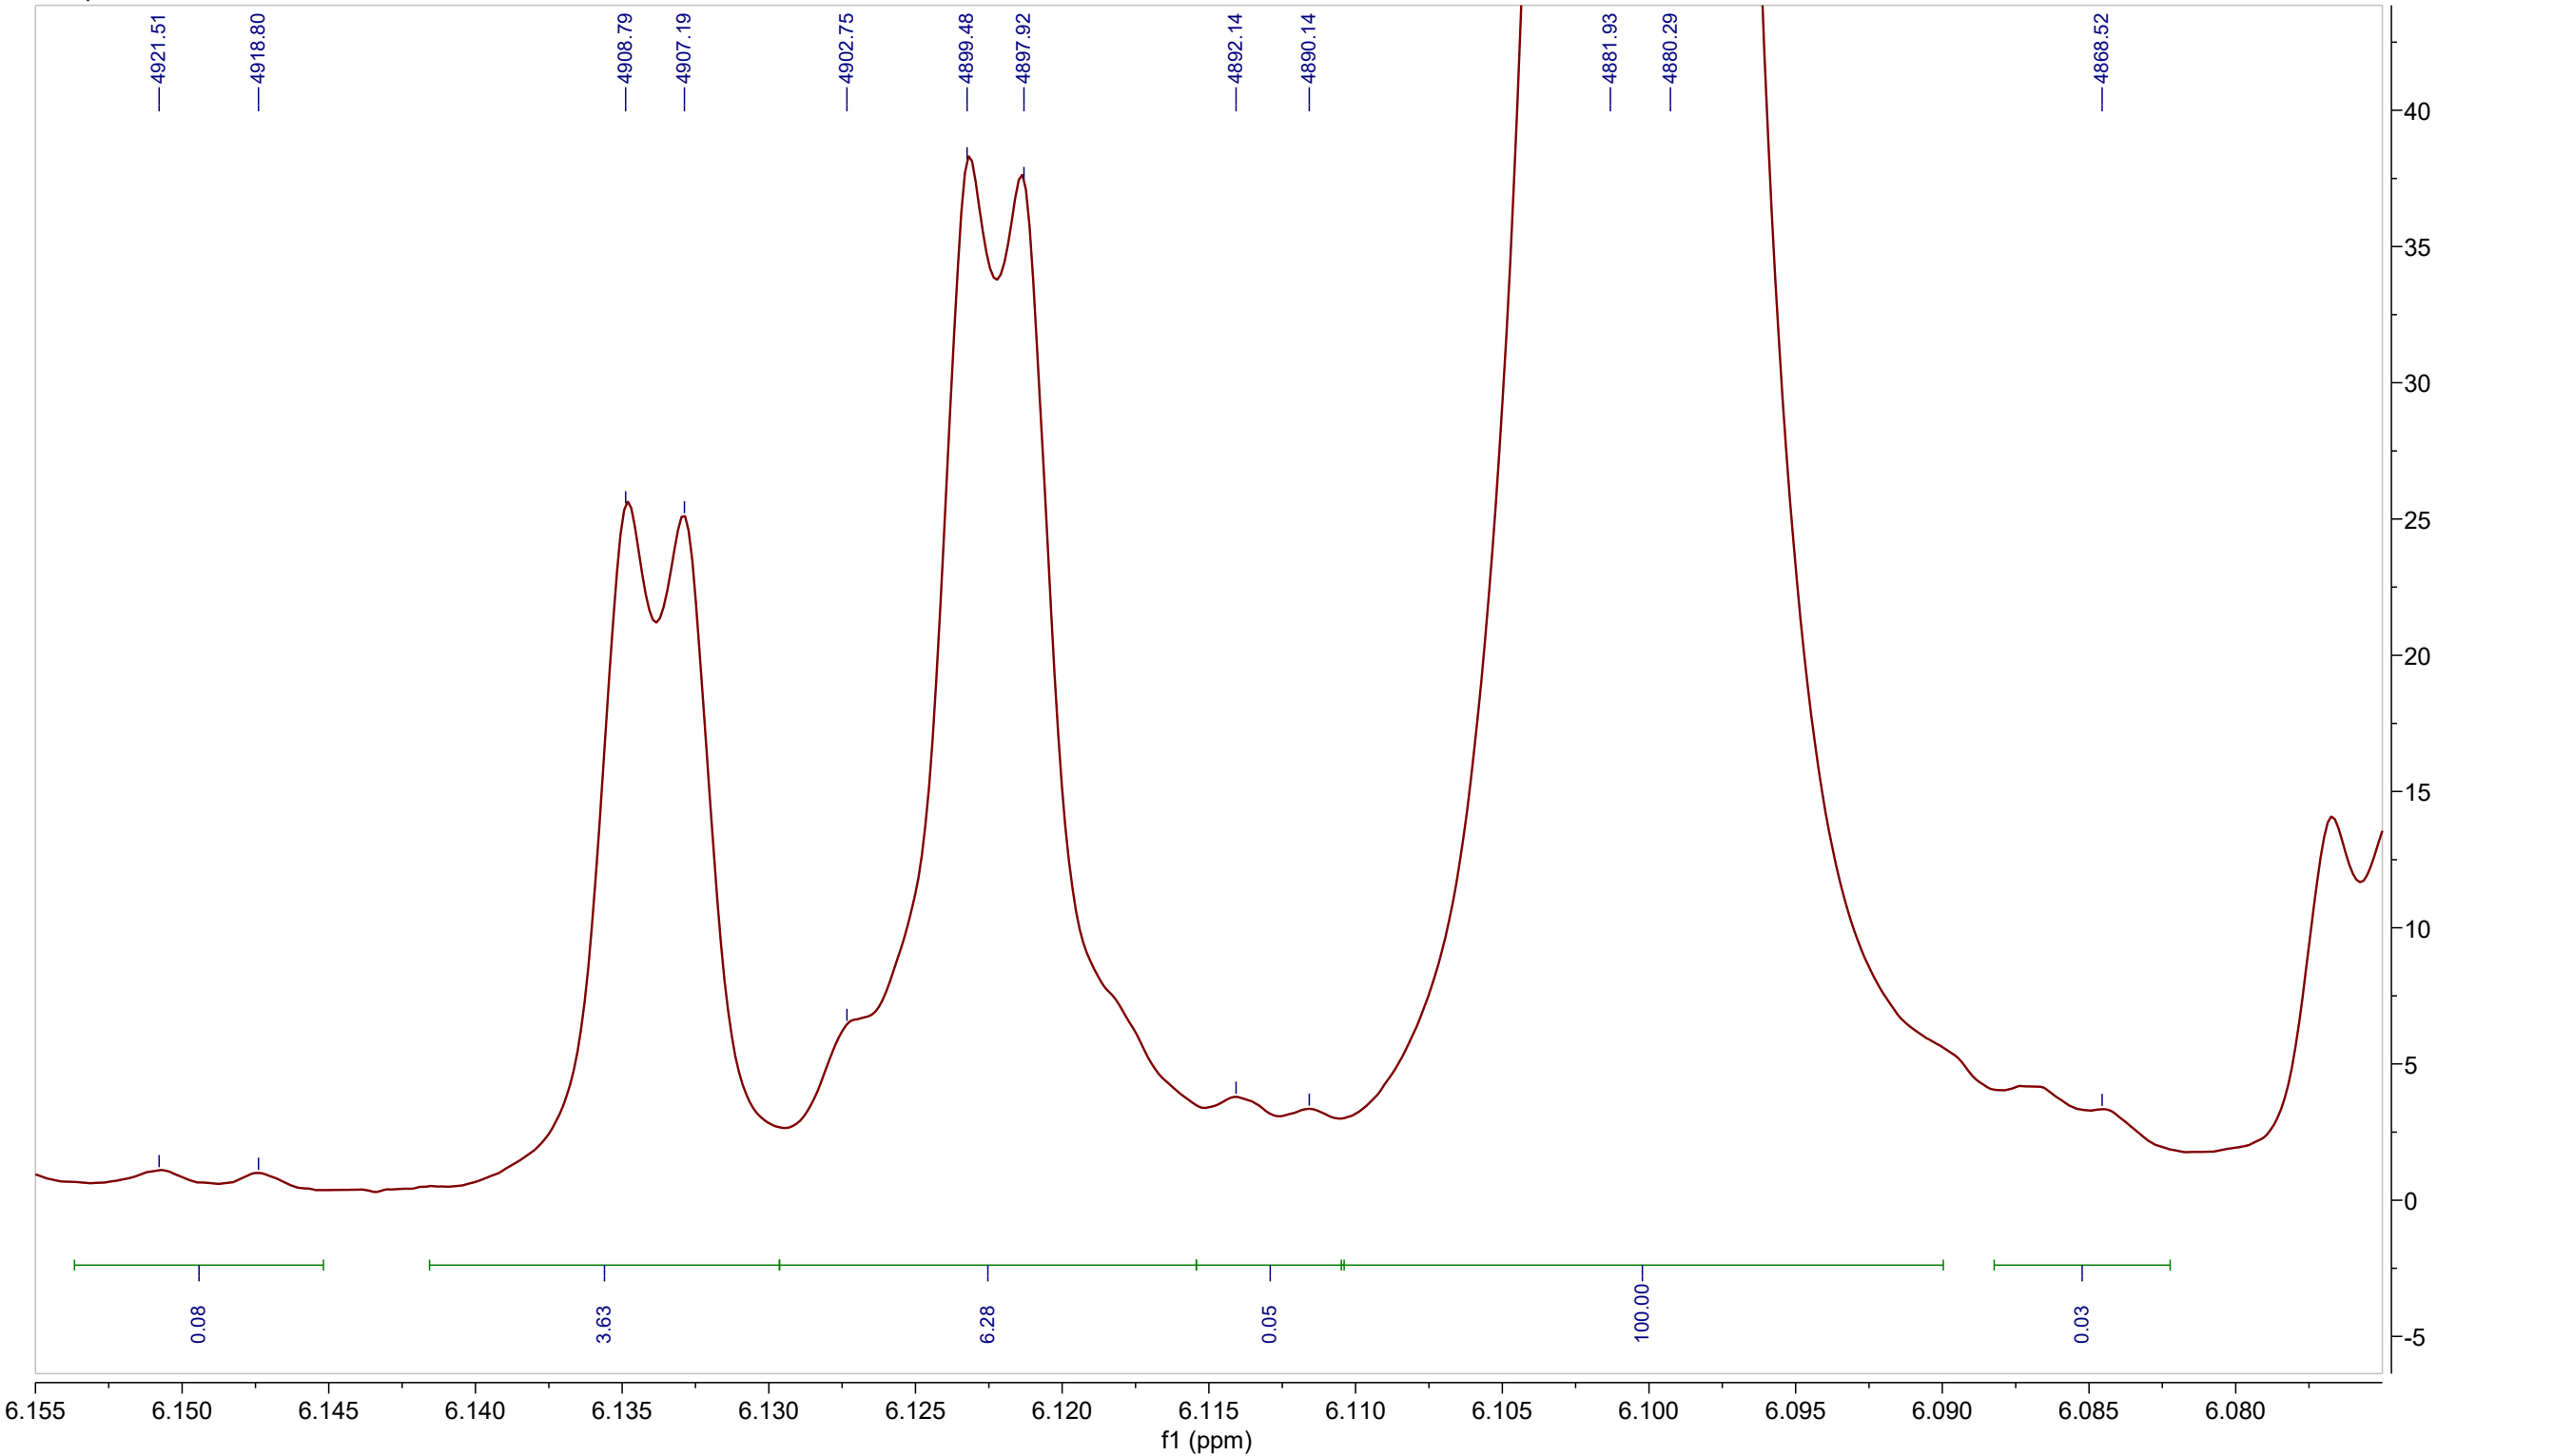

Sample 10

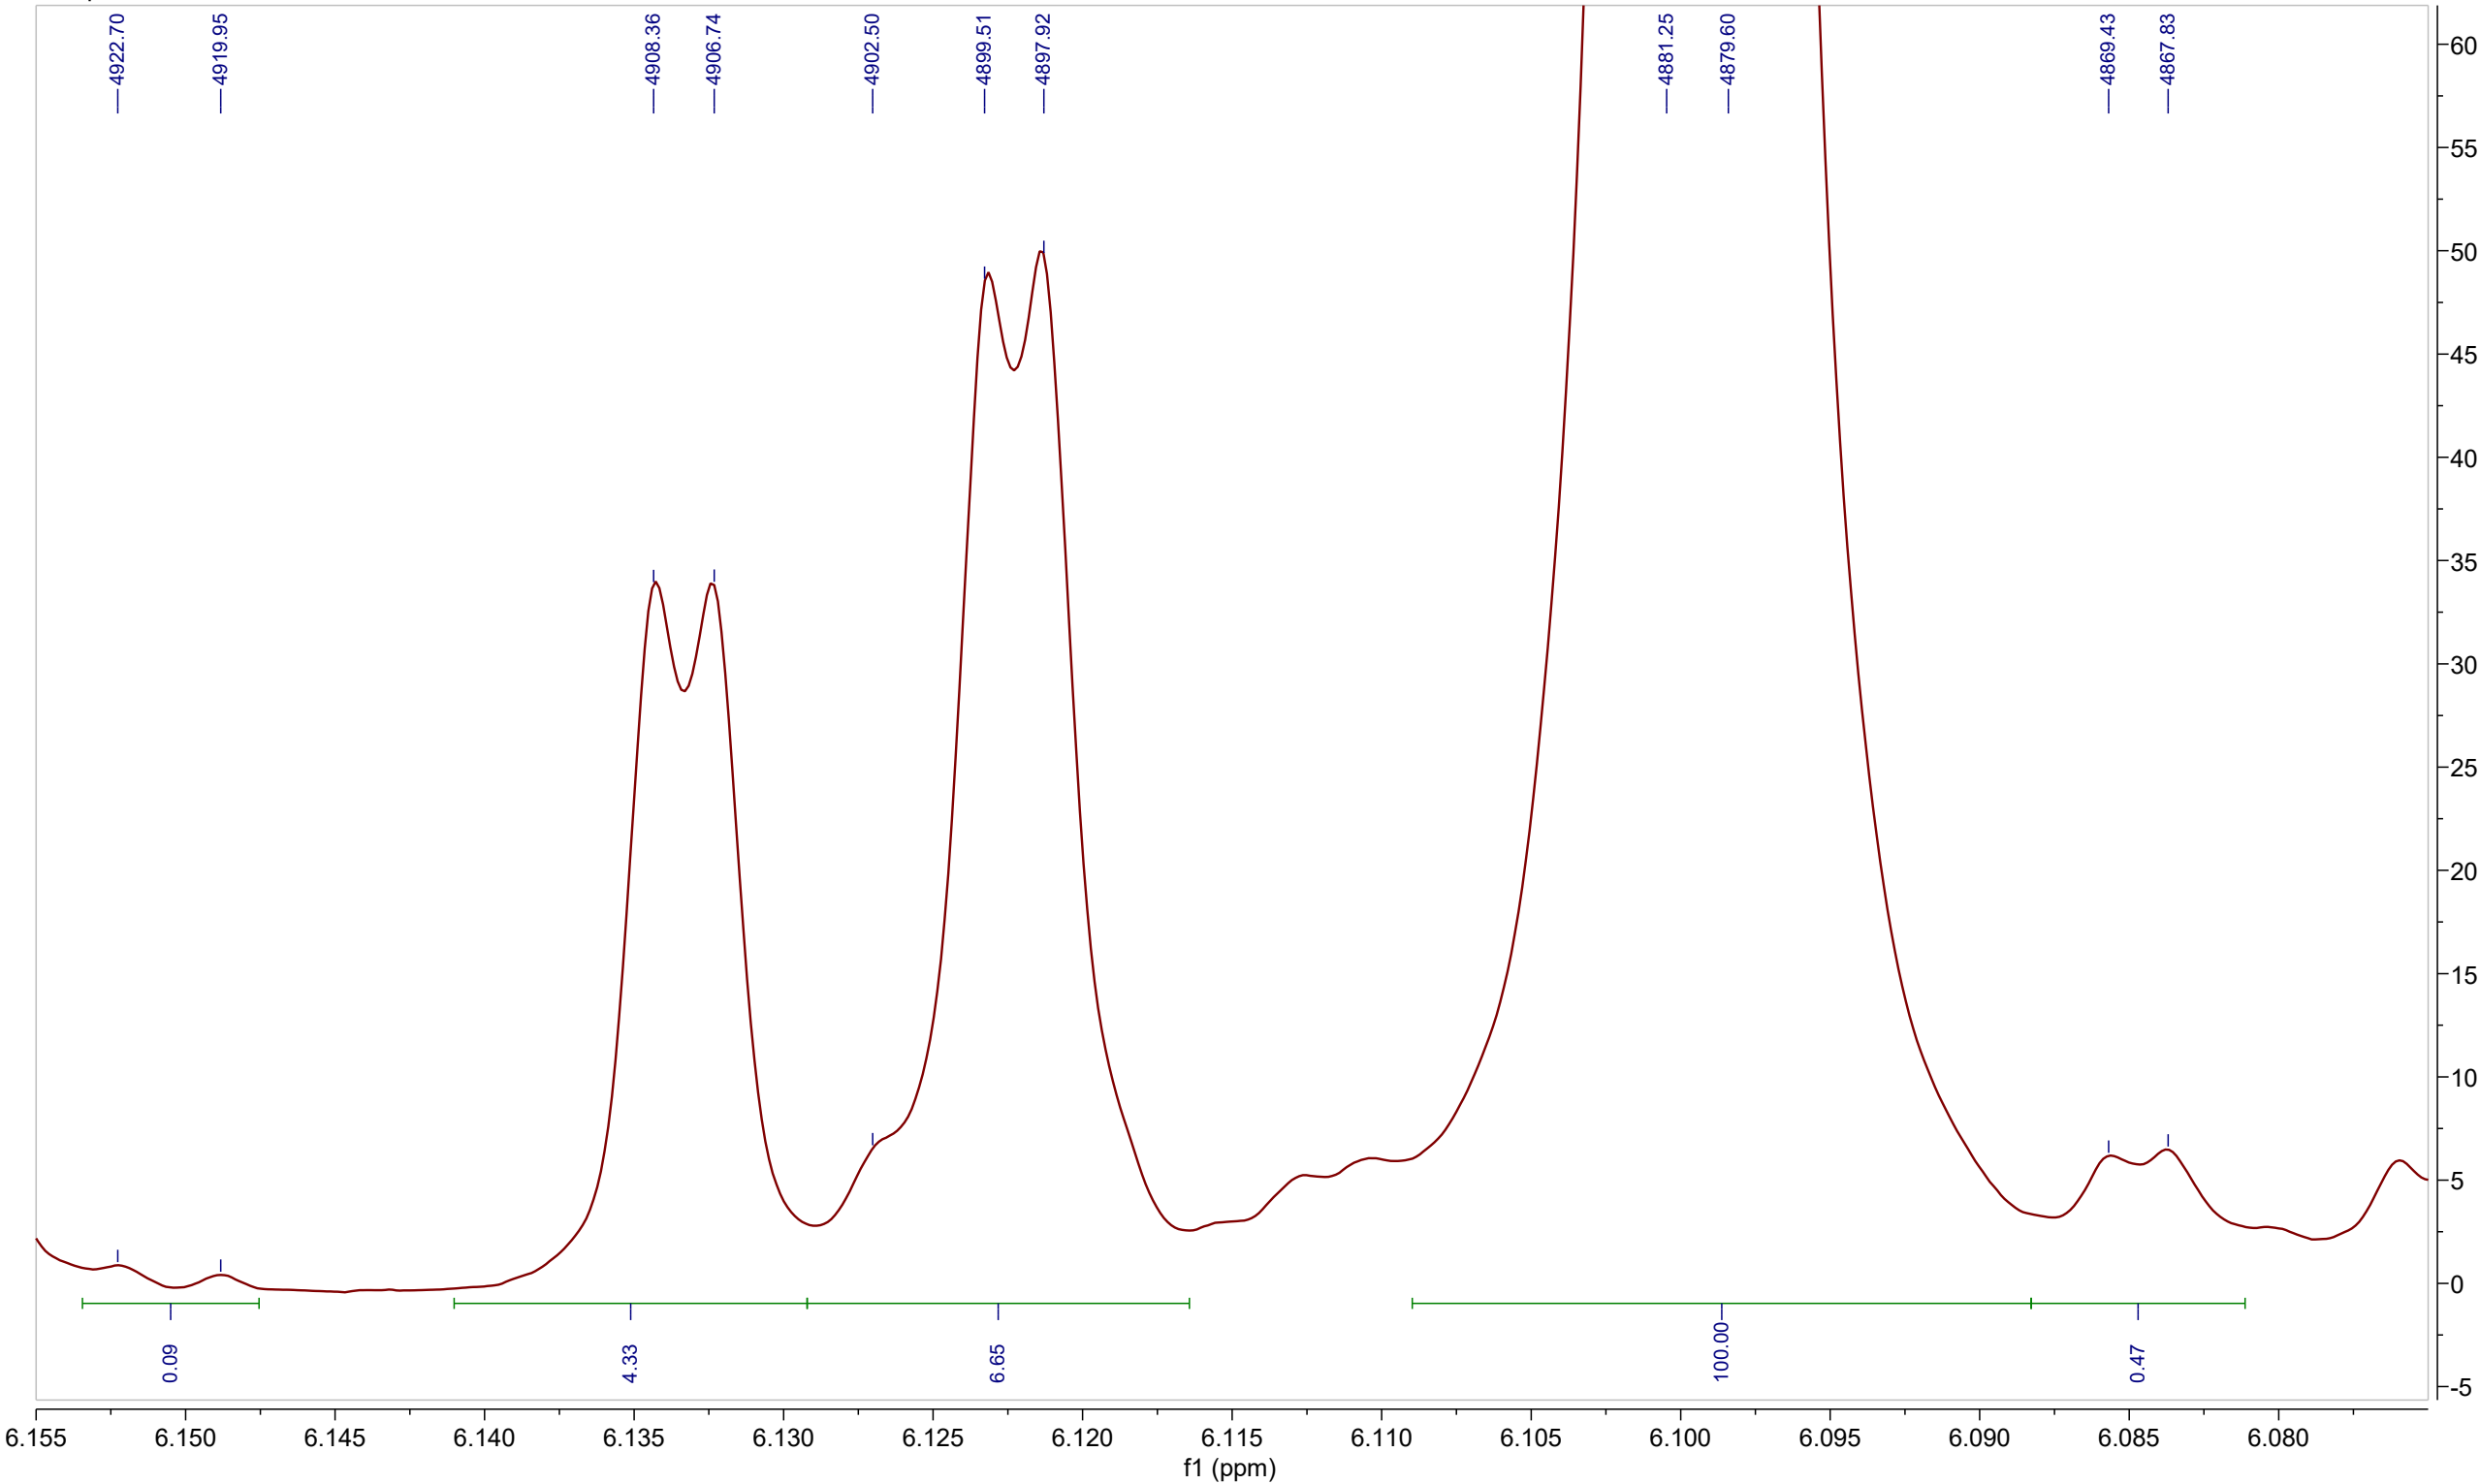

Peak 1

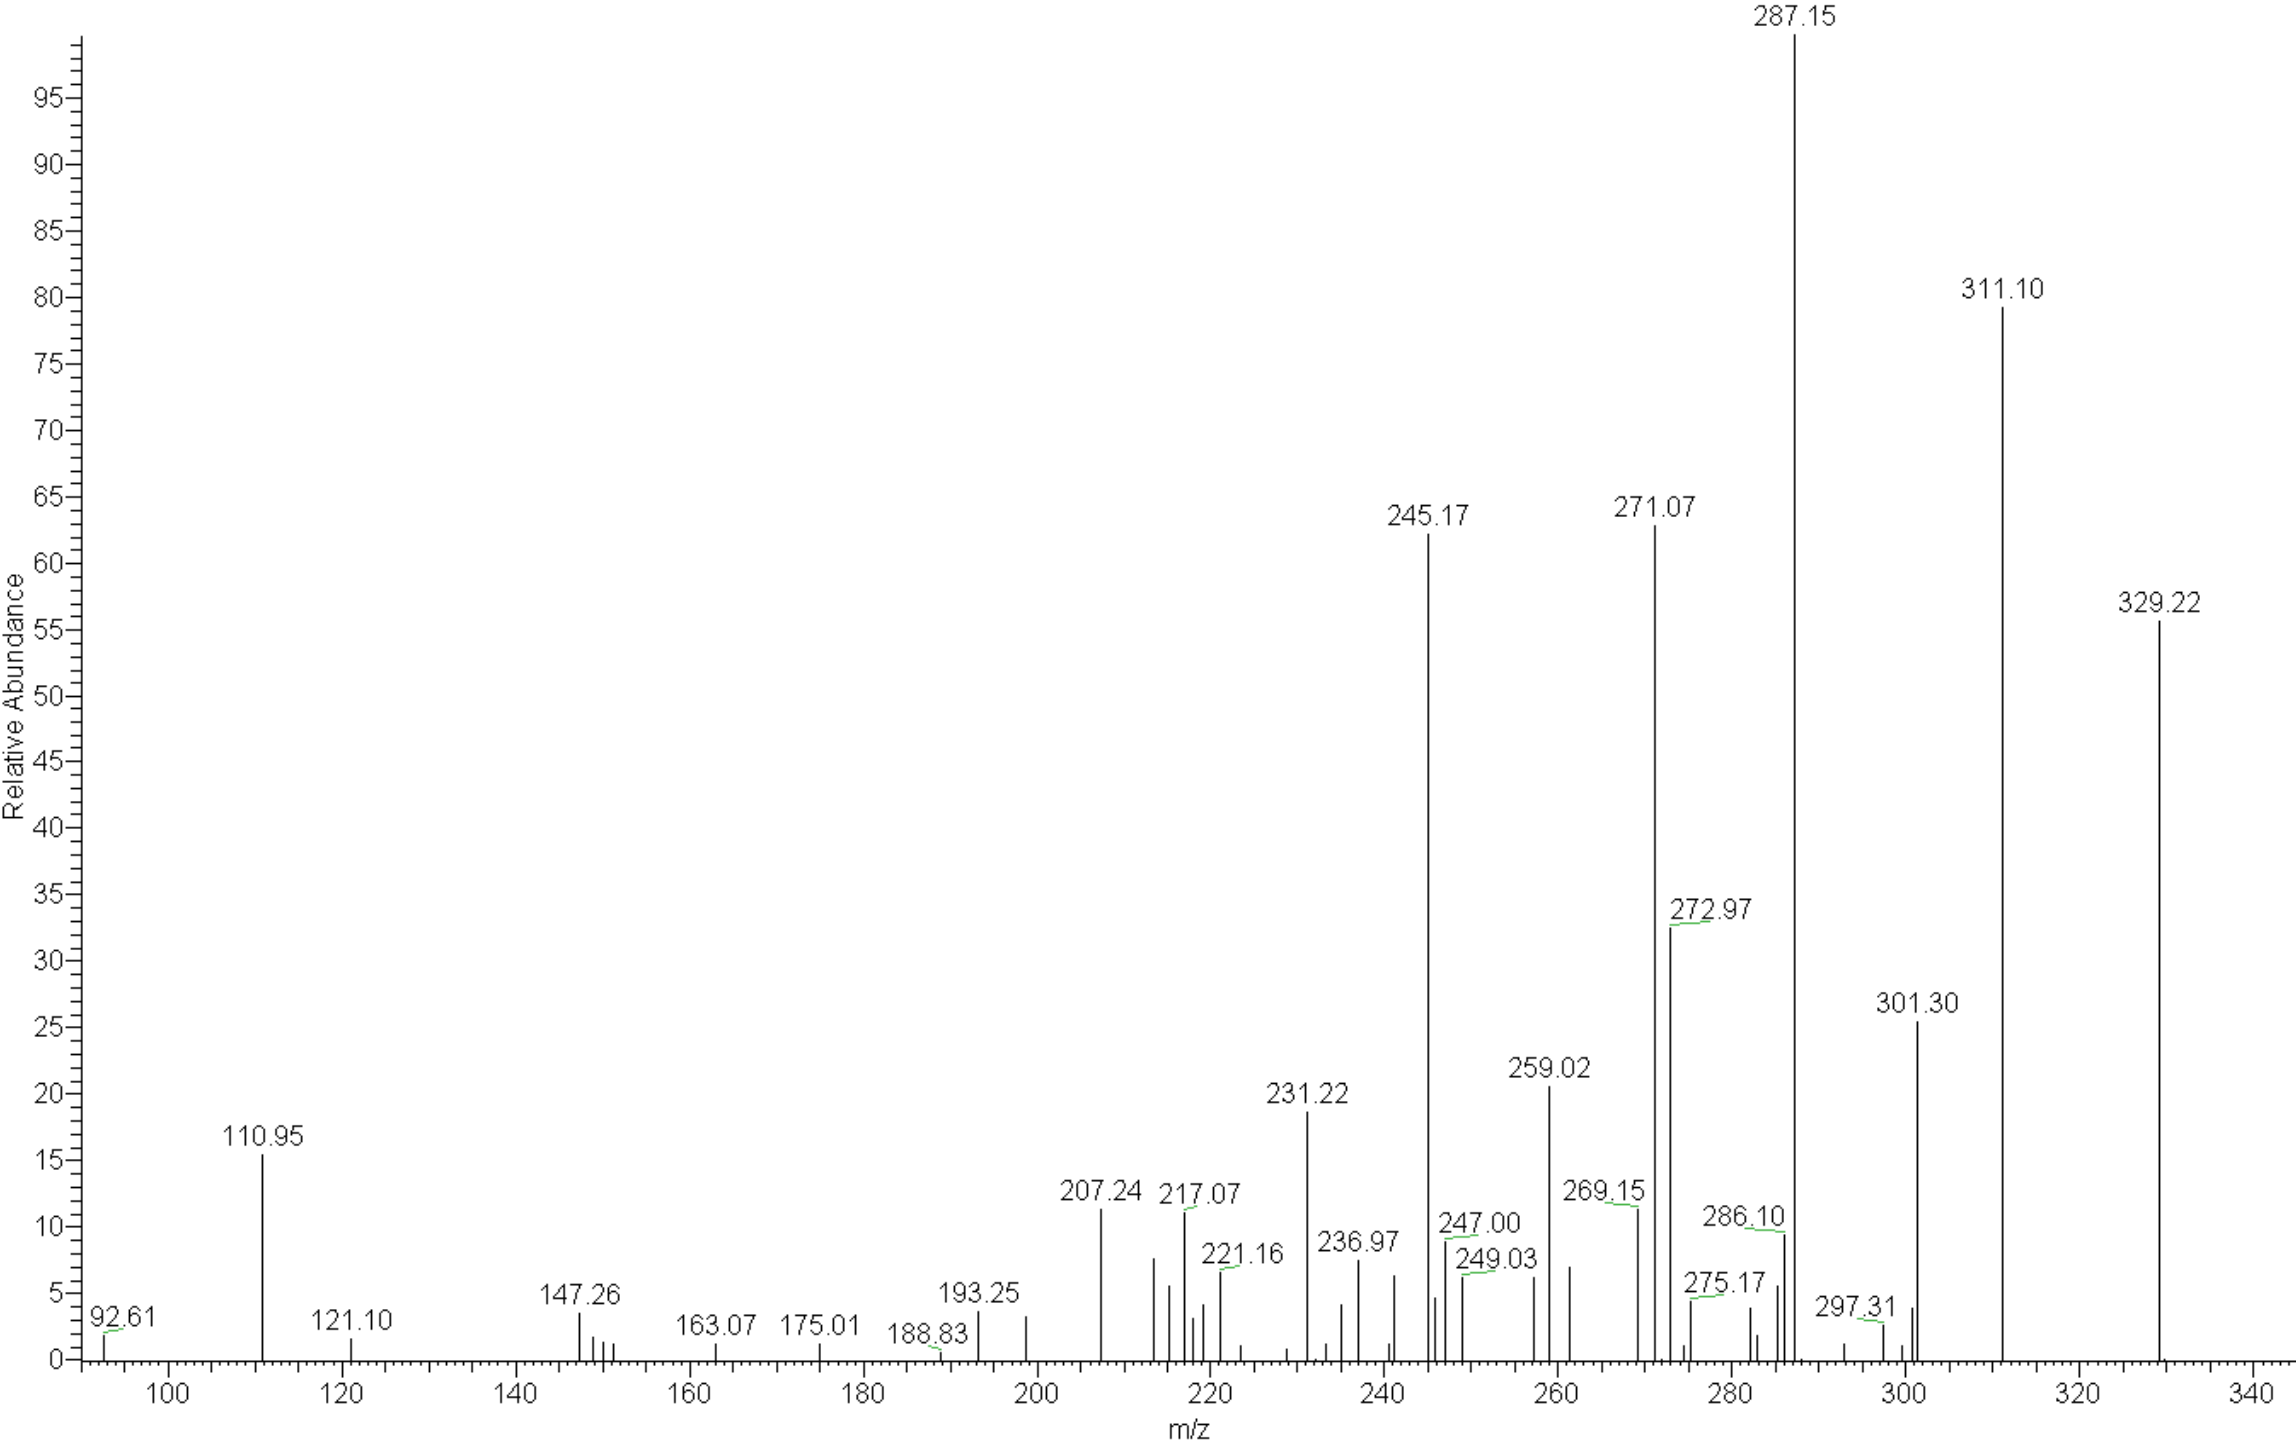

Peak 2

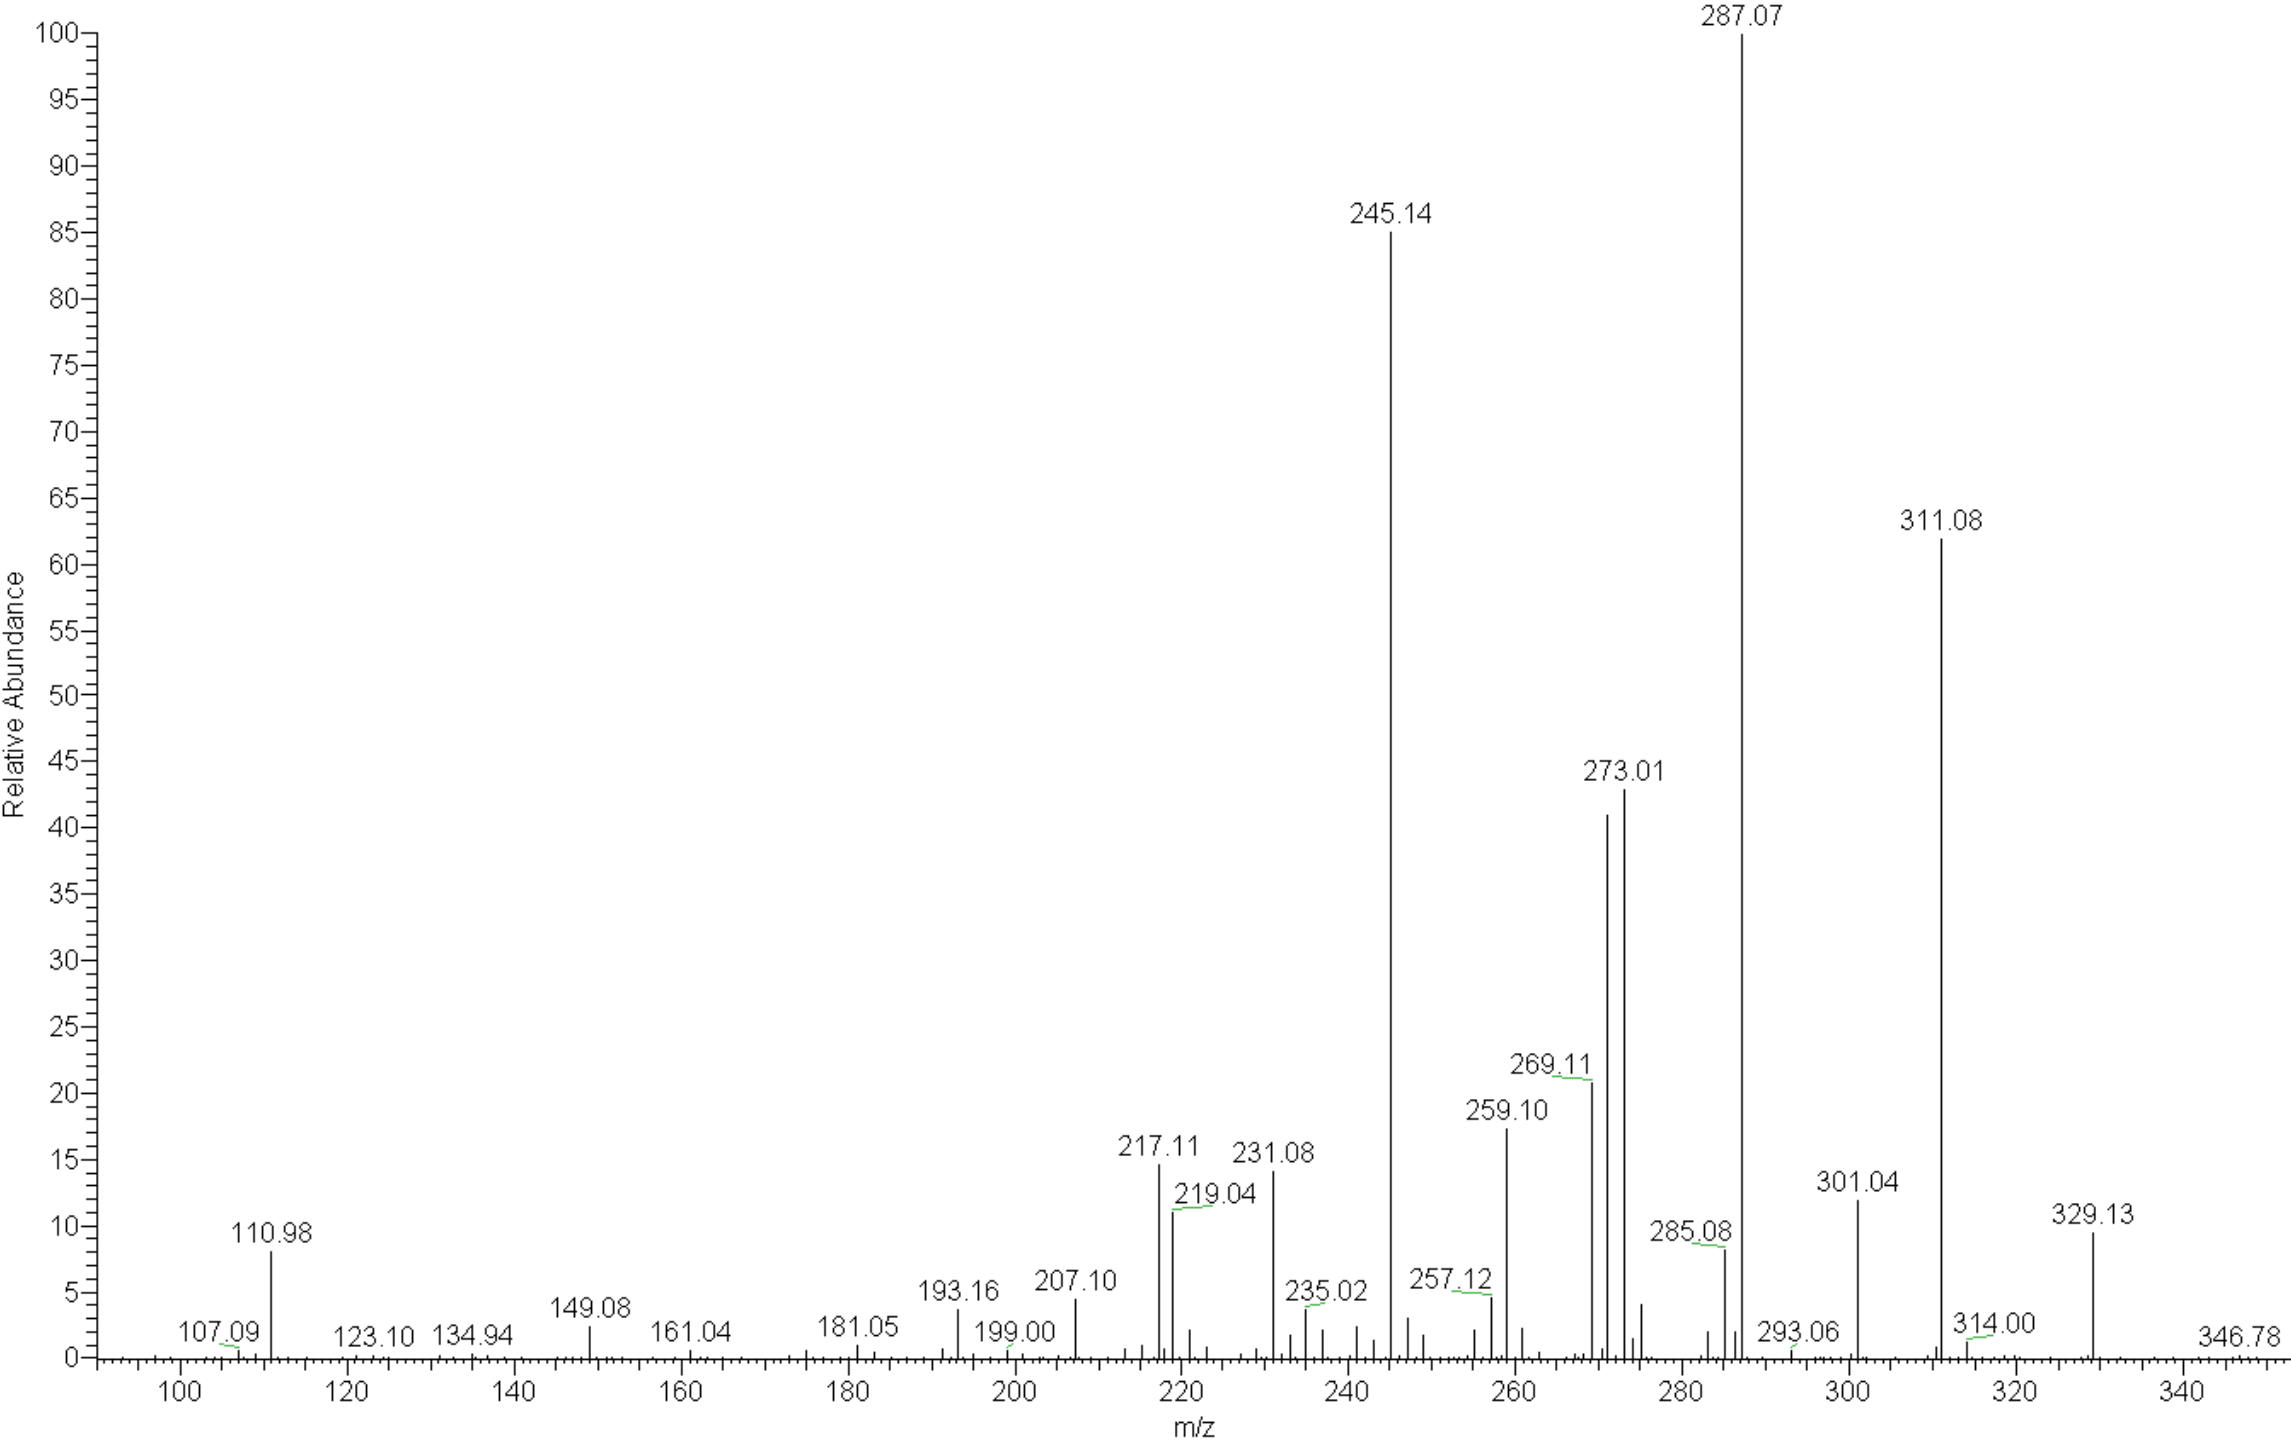

Peak 3

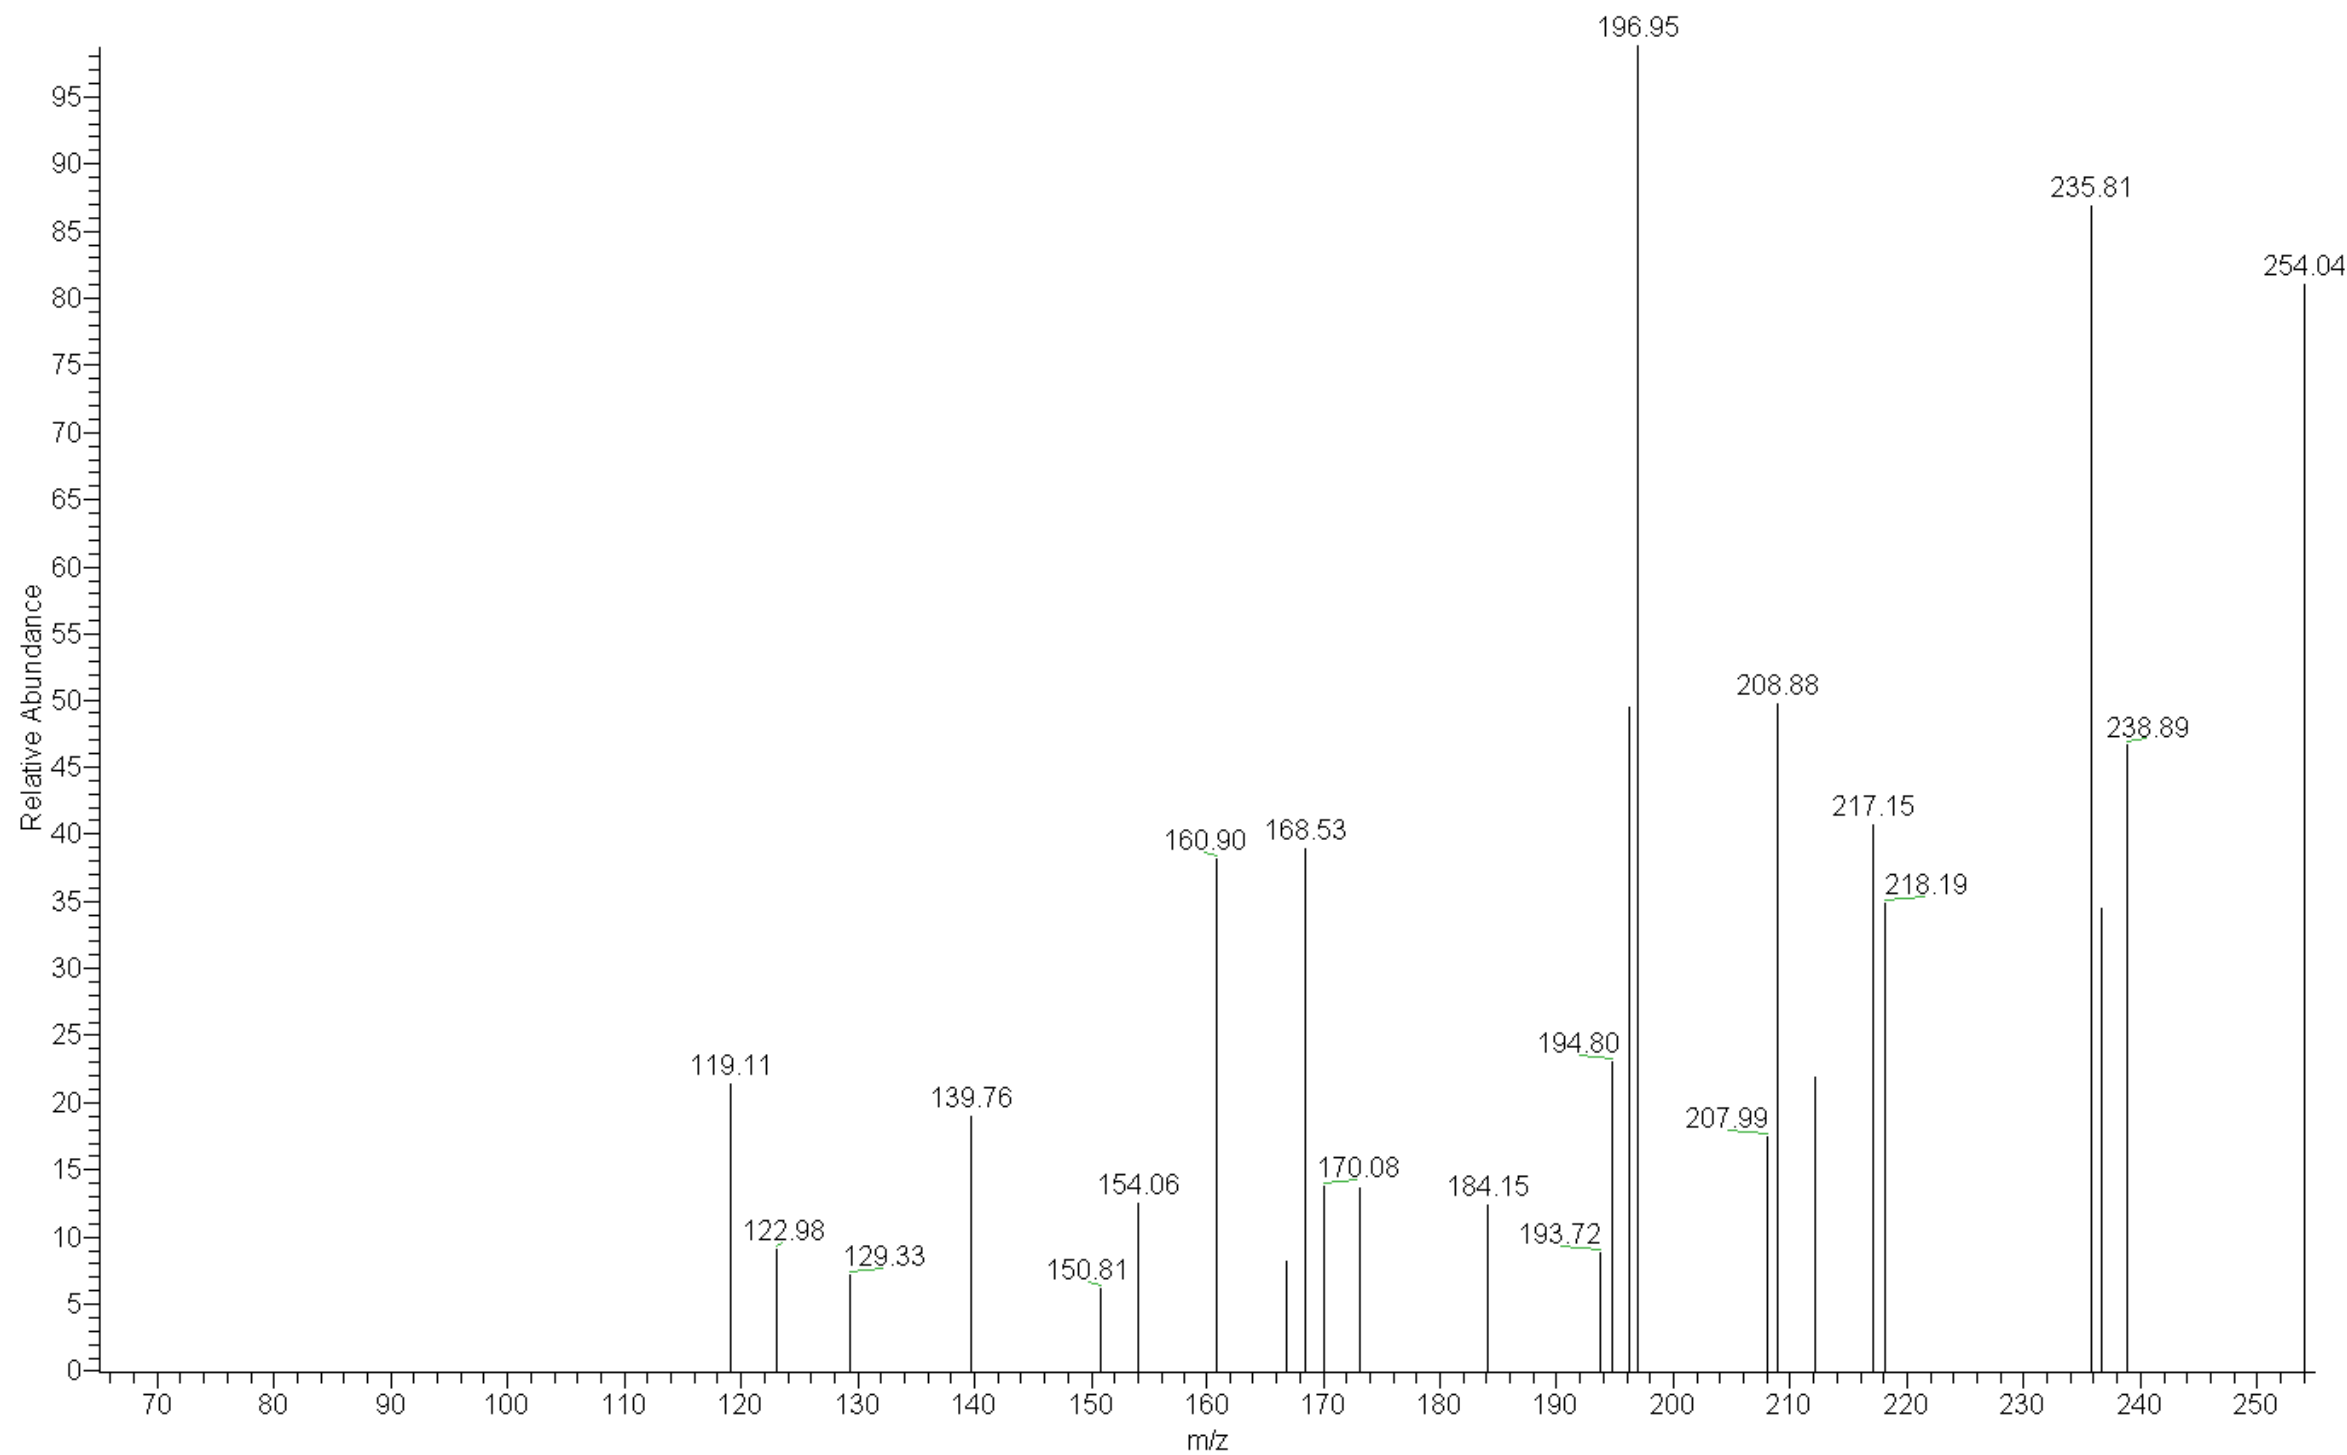

Peak 4

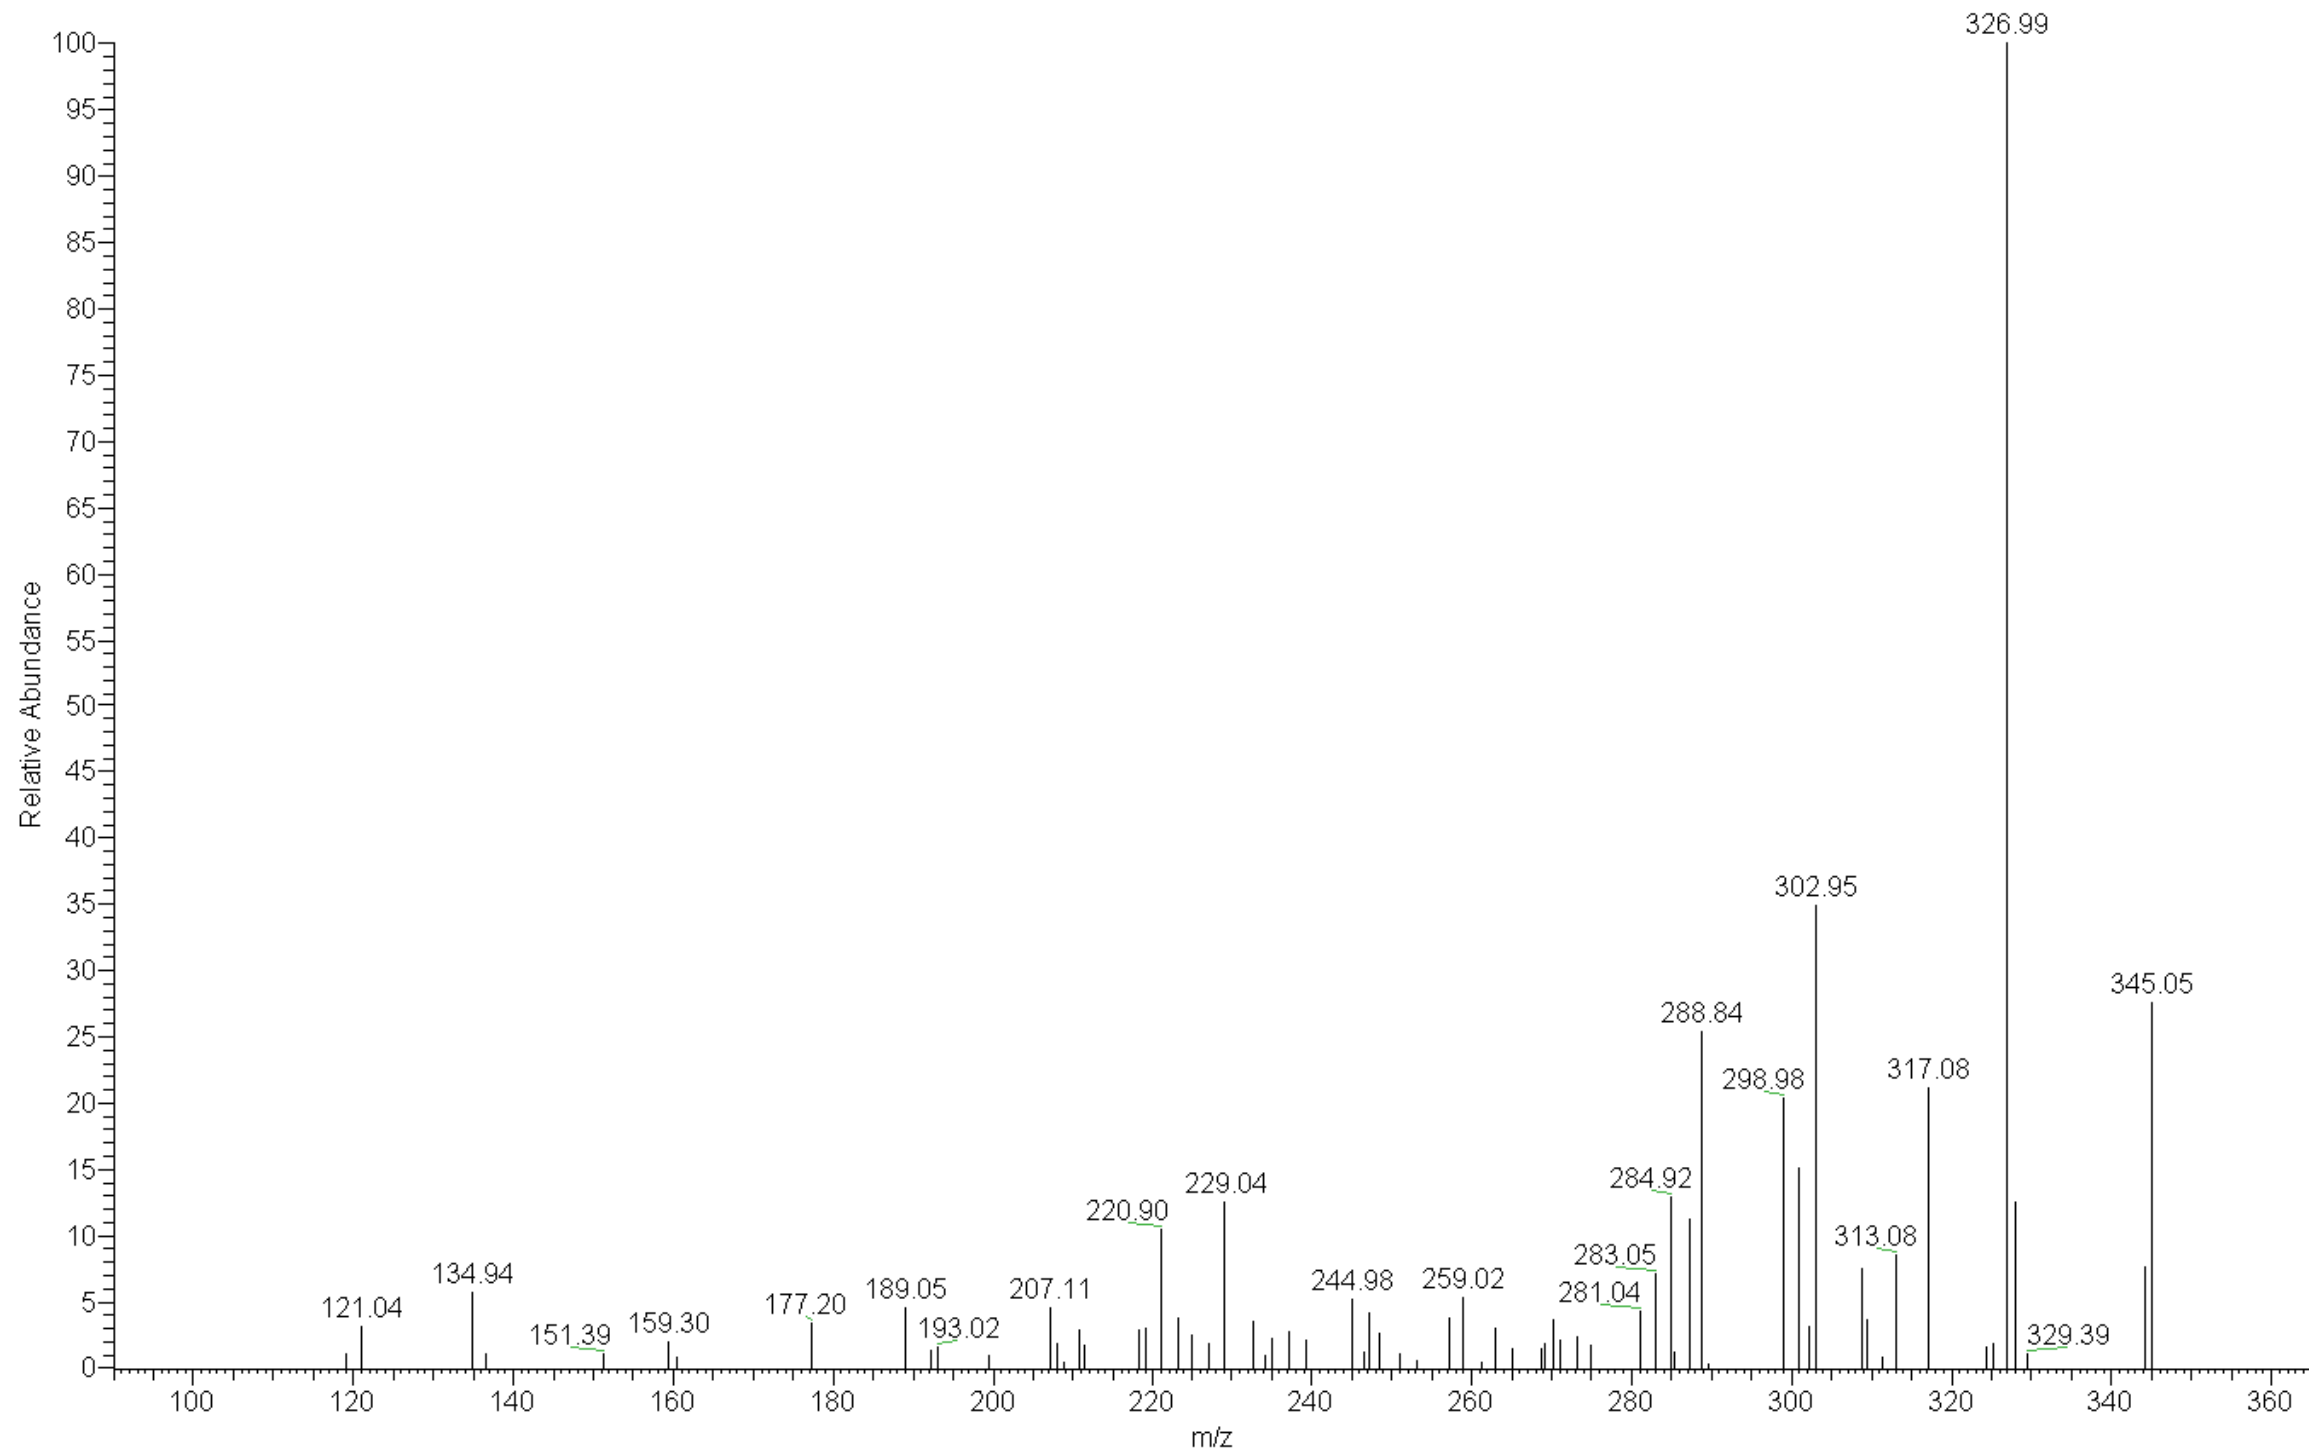

Peak 5

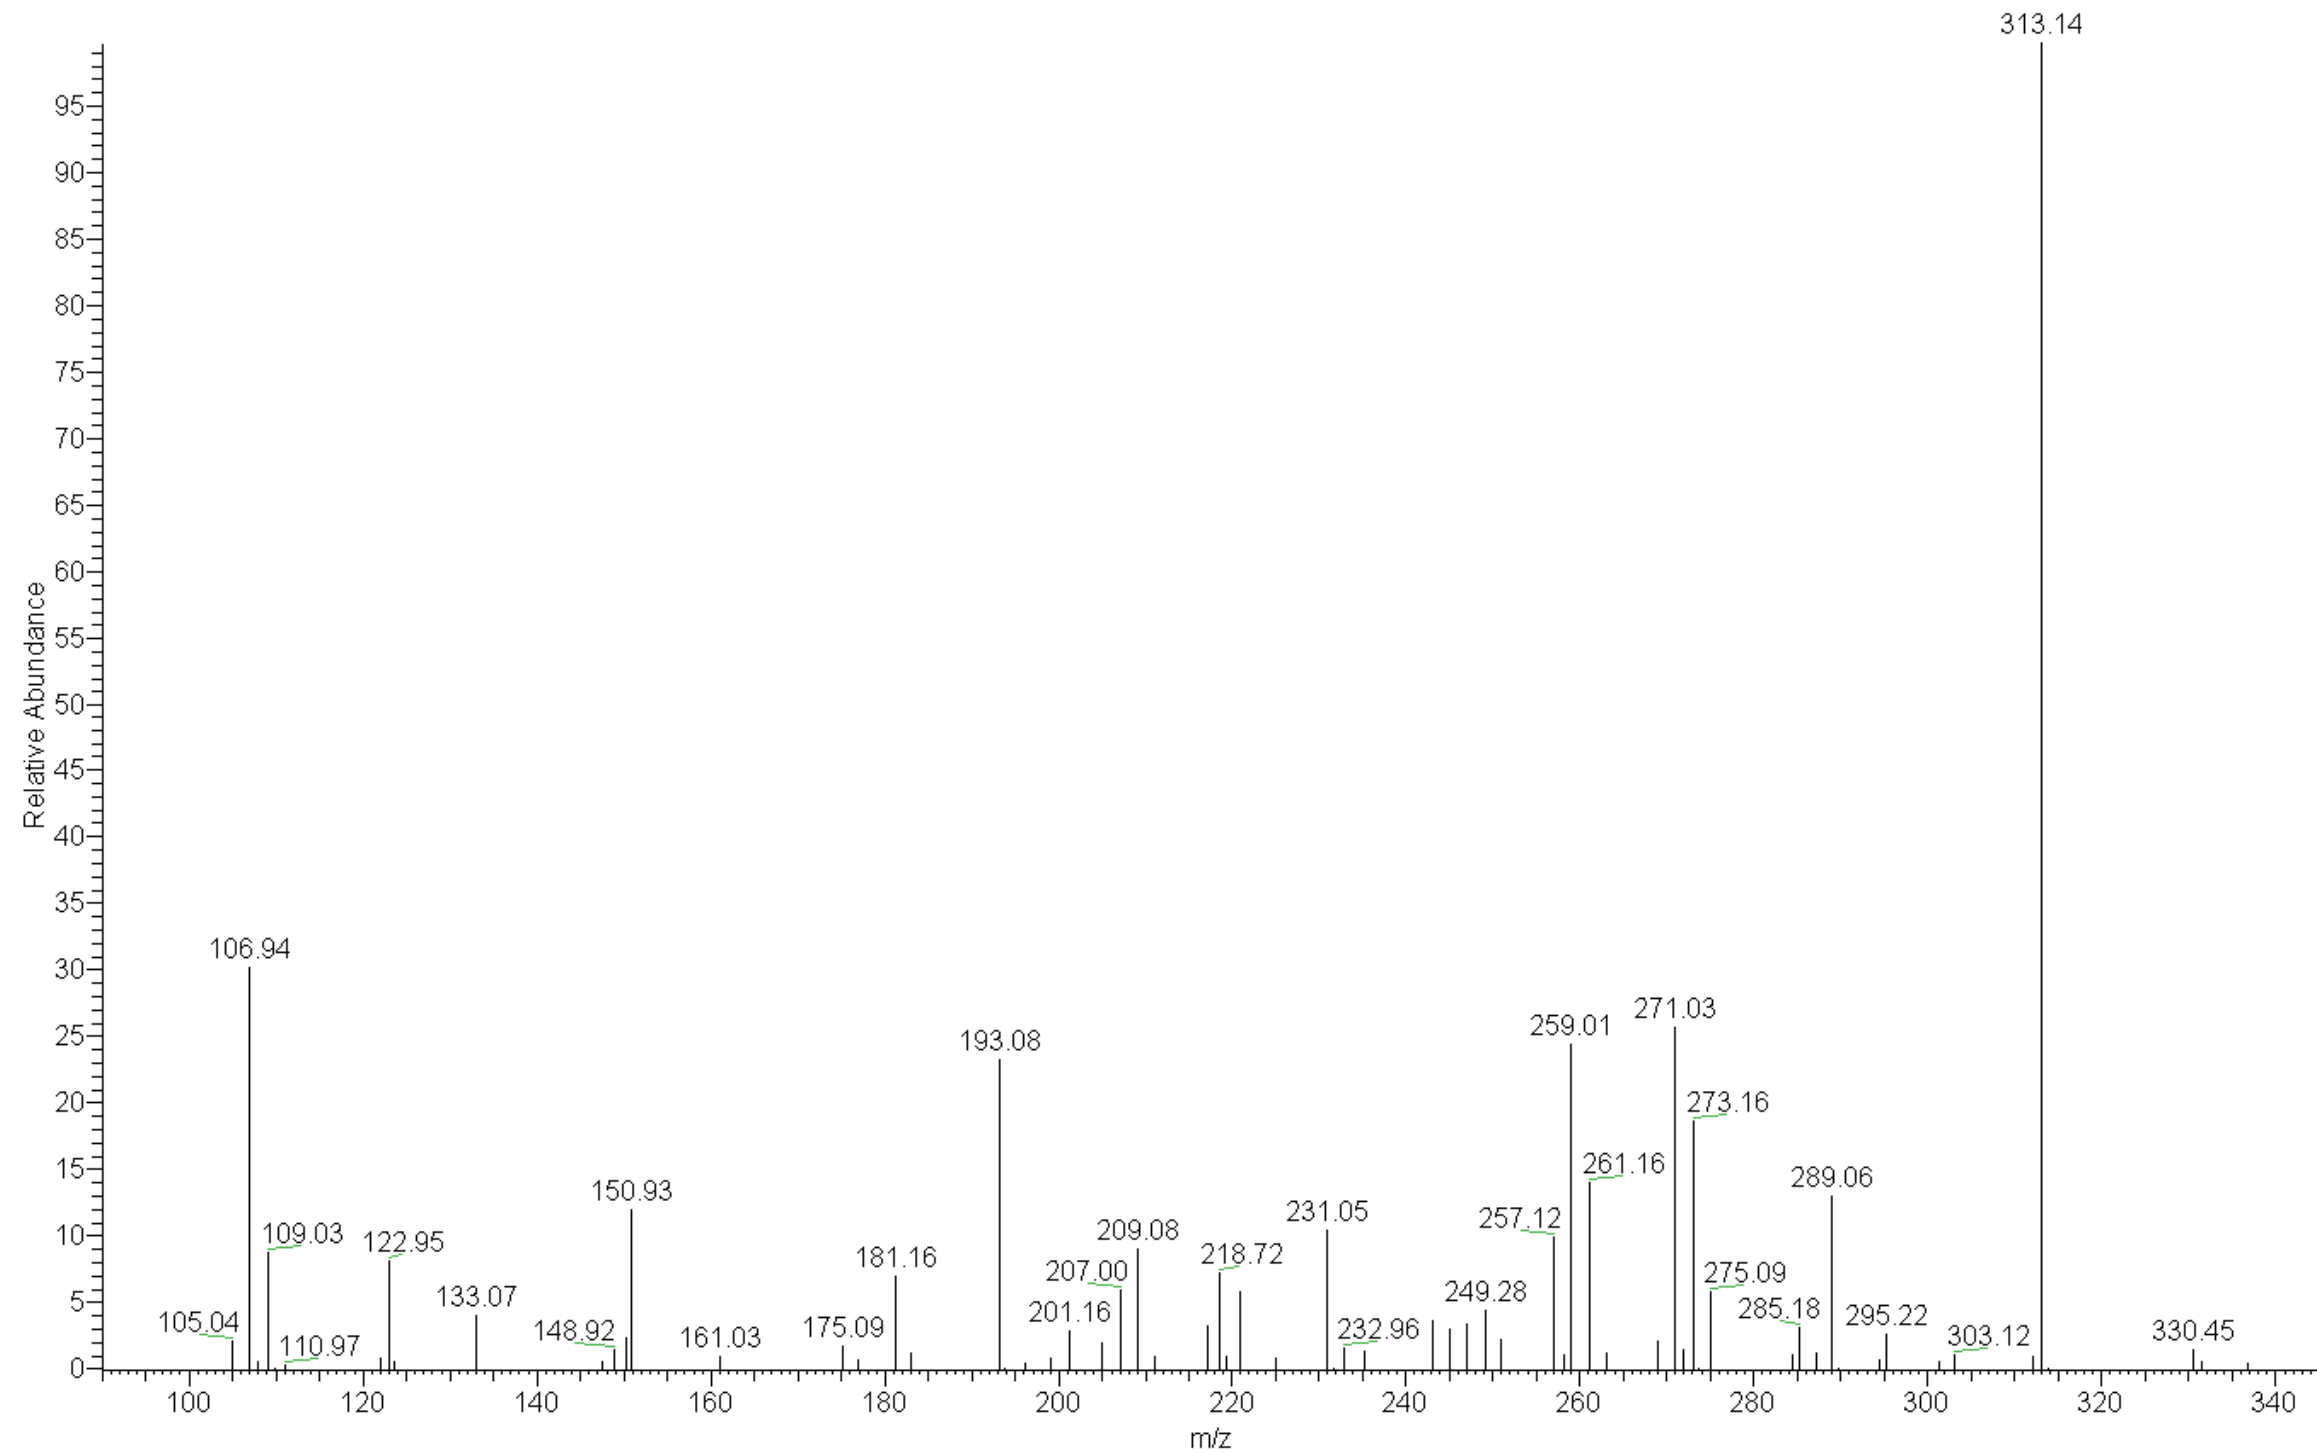



Peak 6

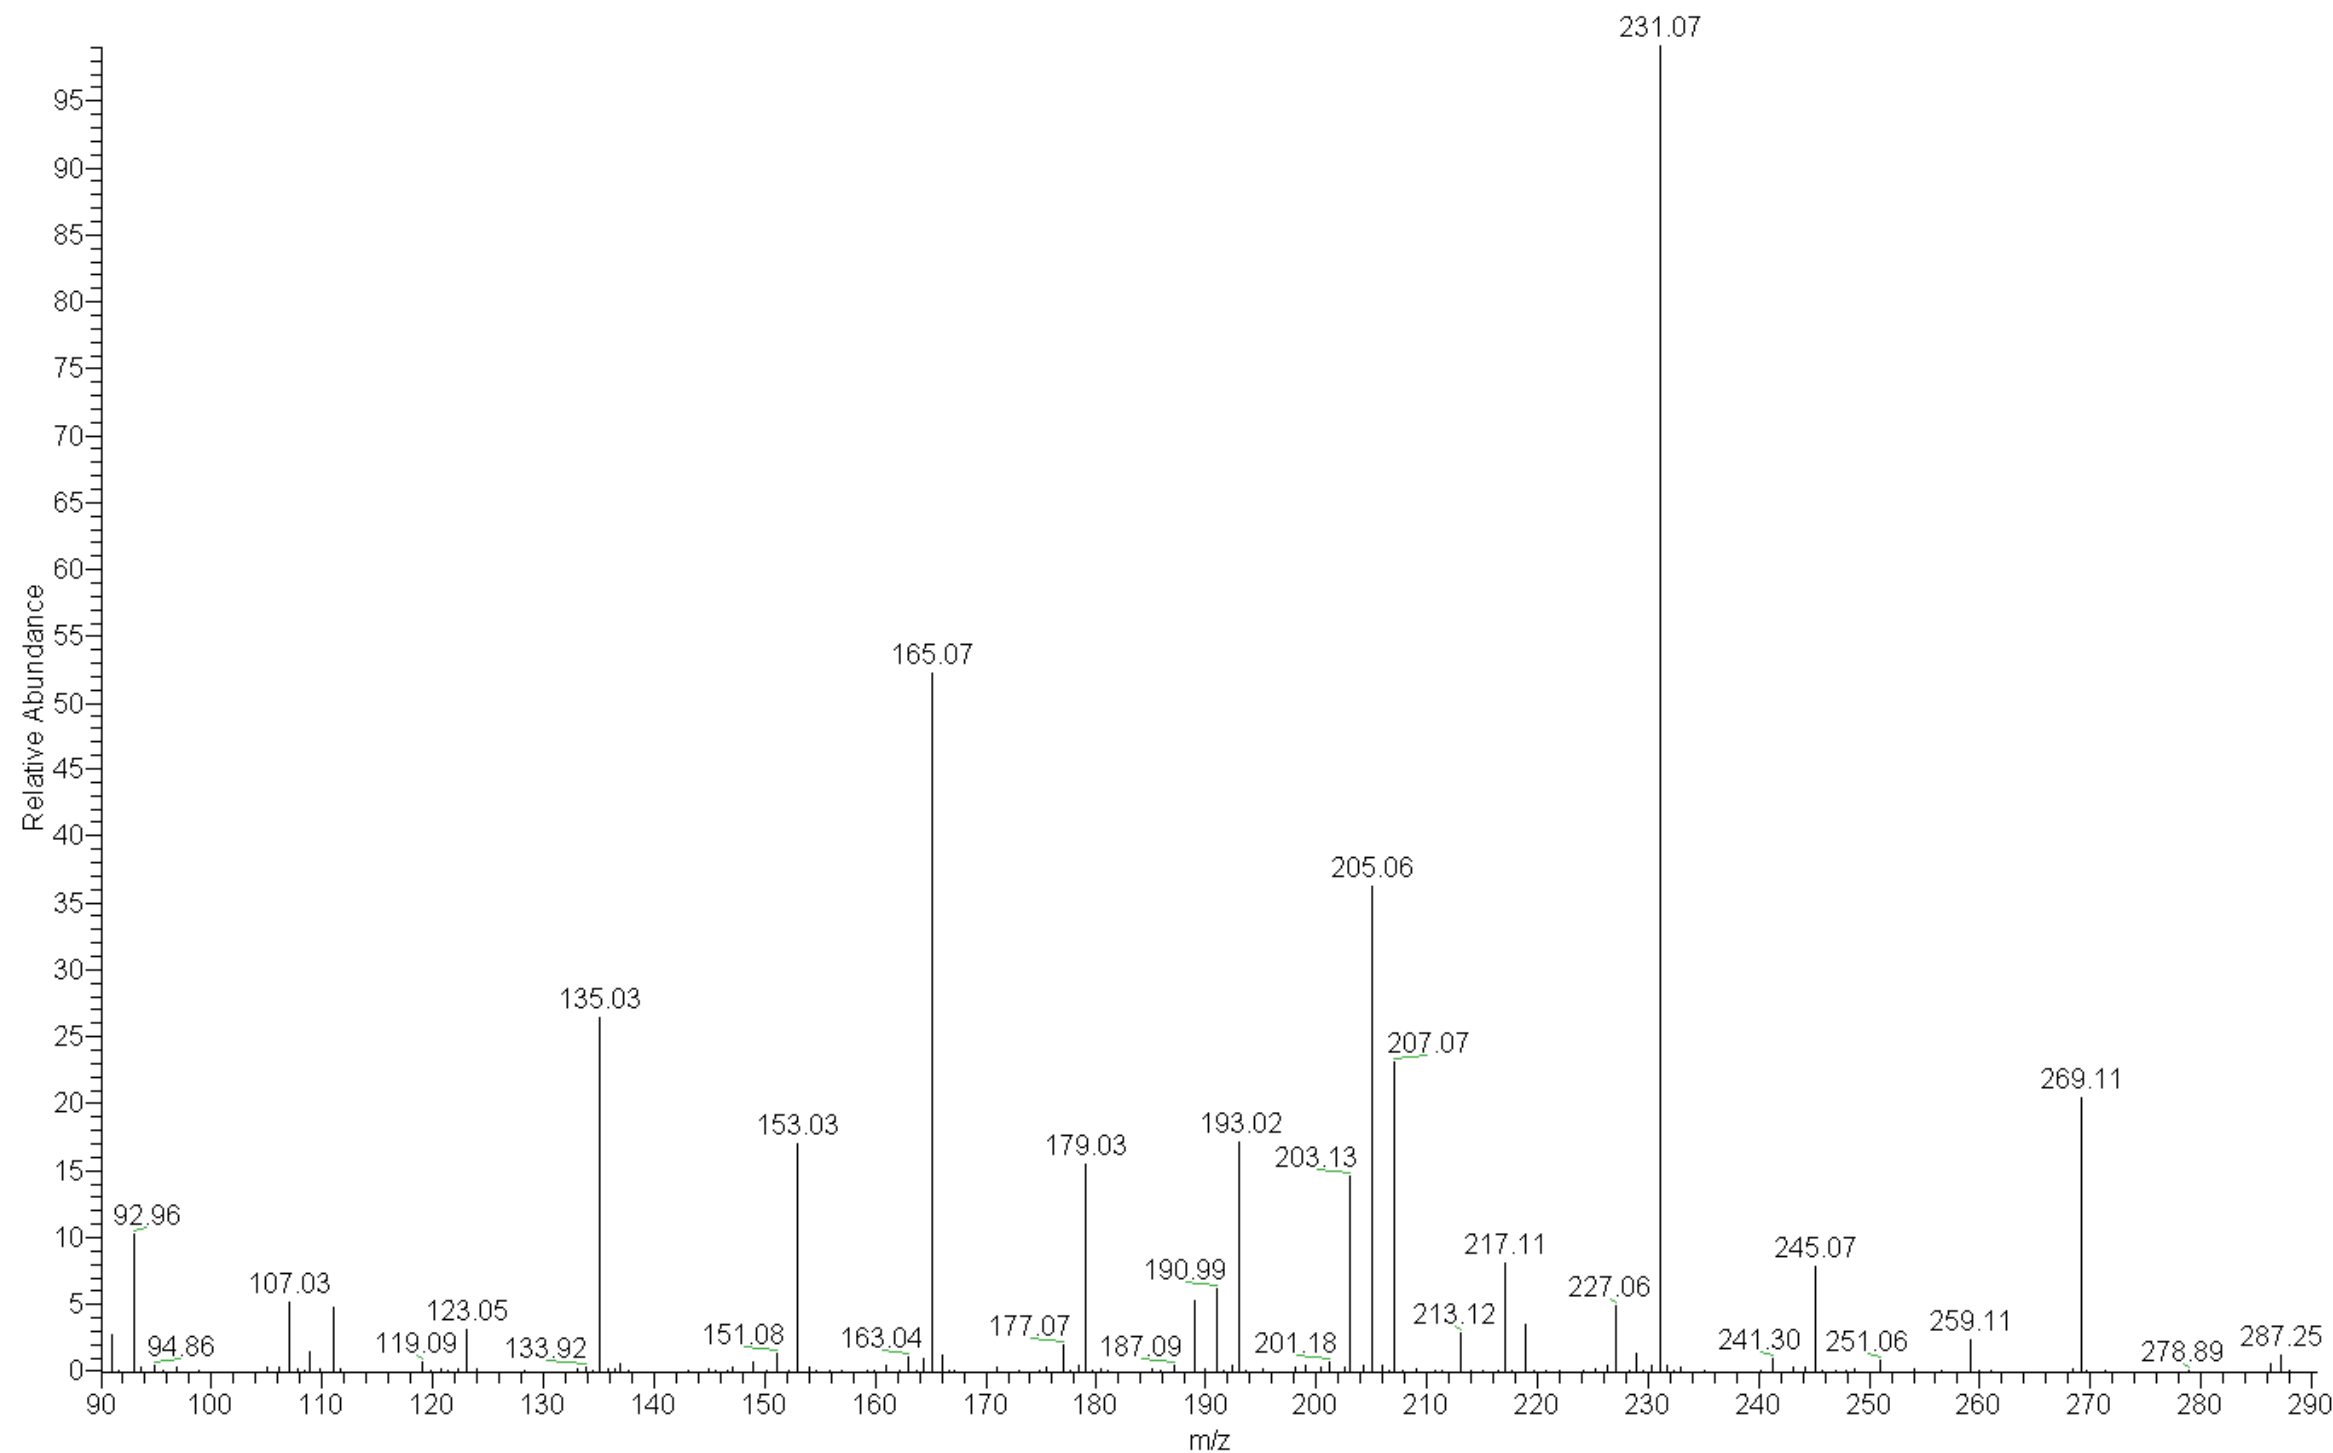

Peak 7

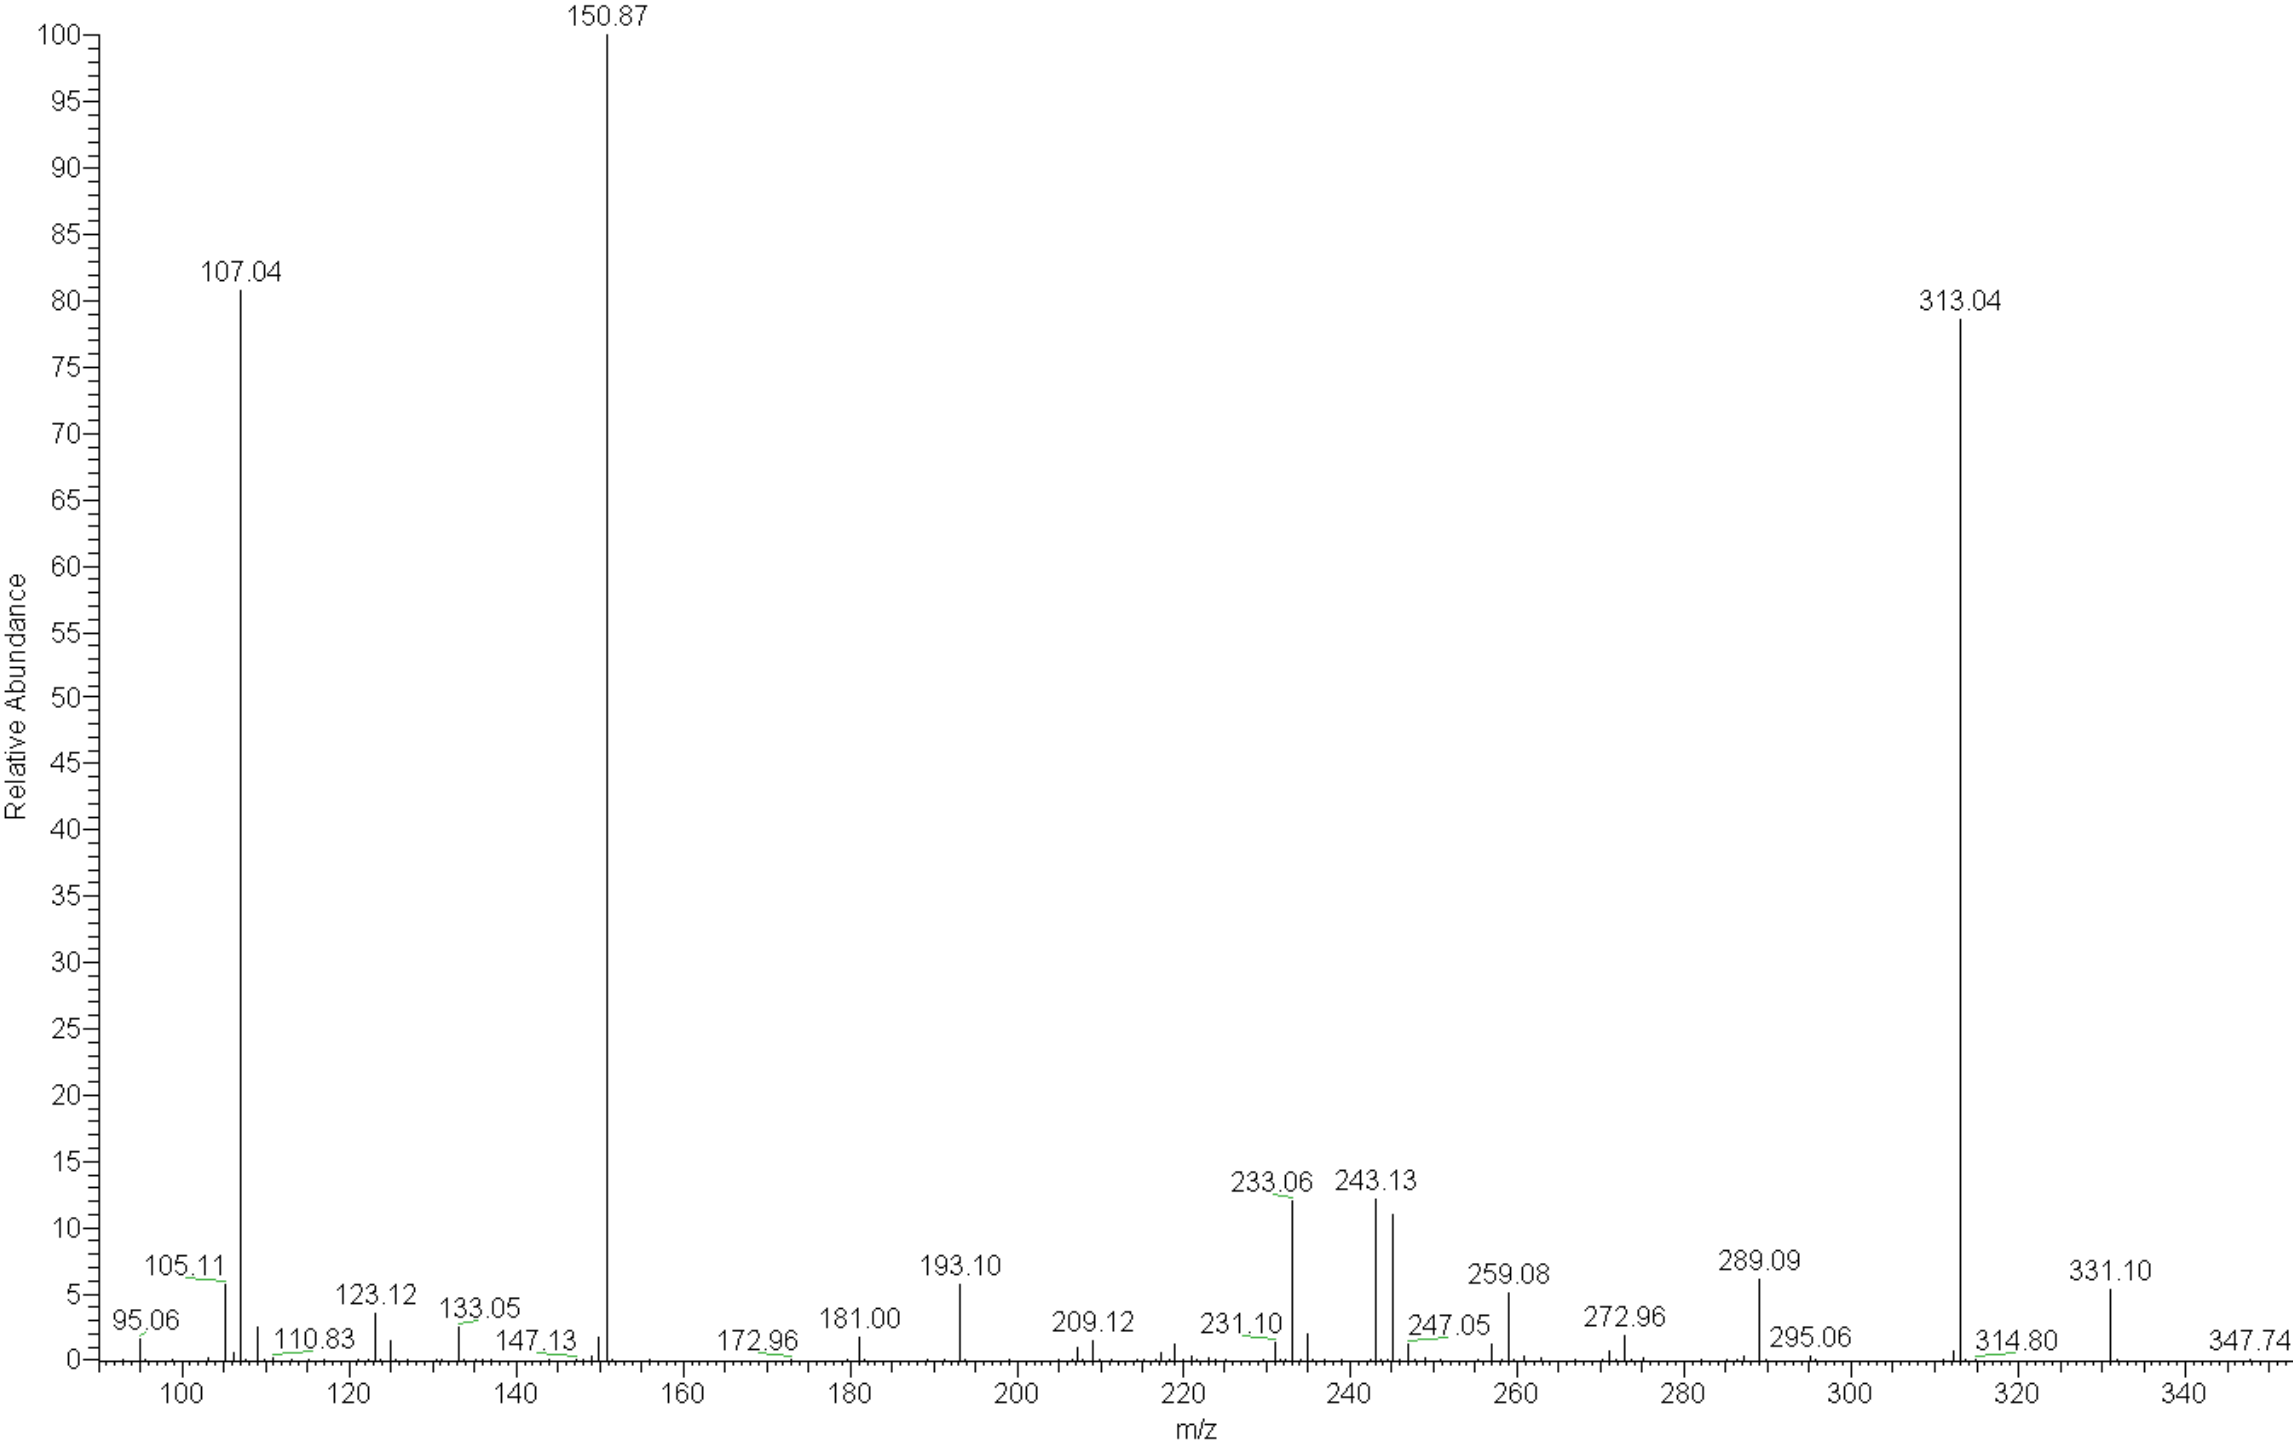

Peak 8

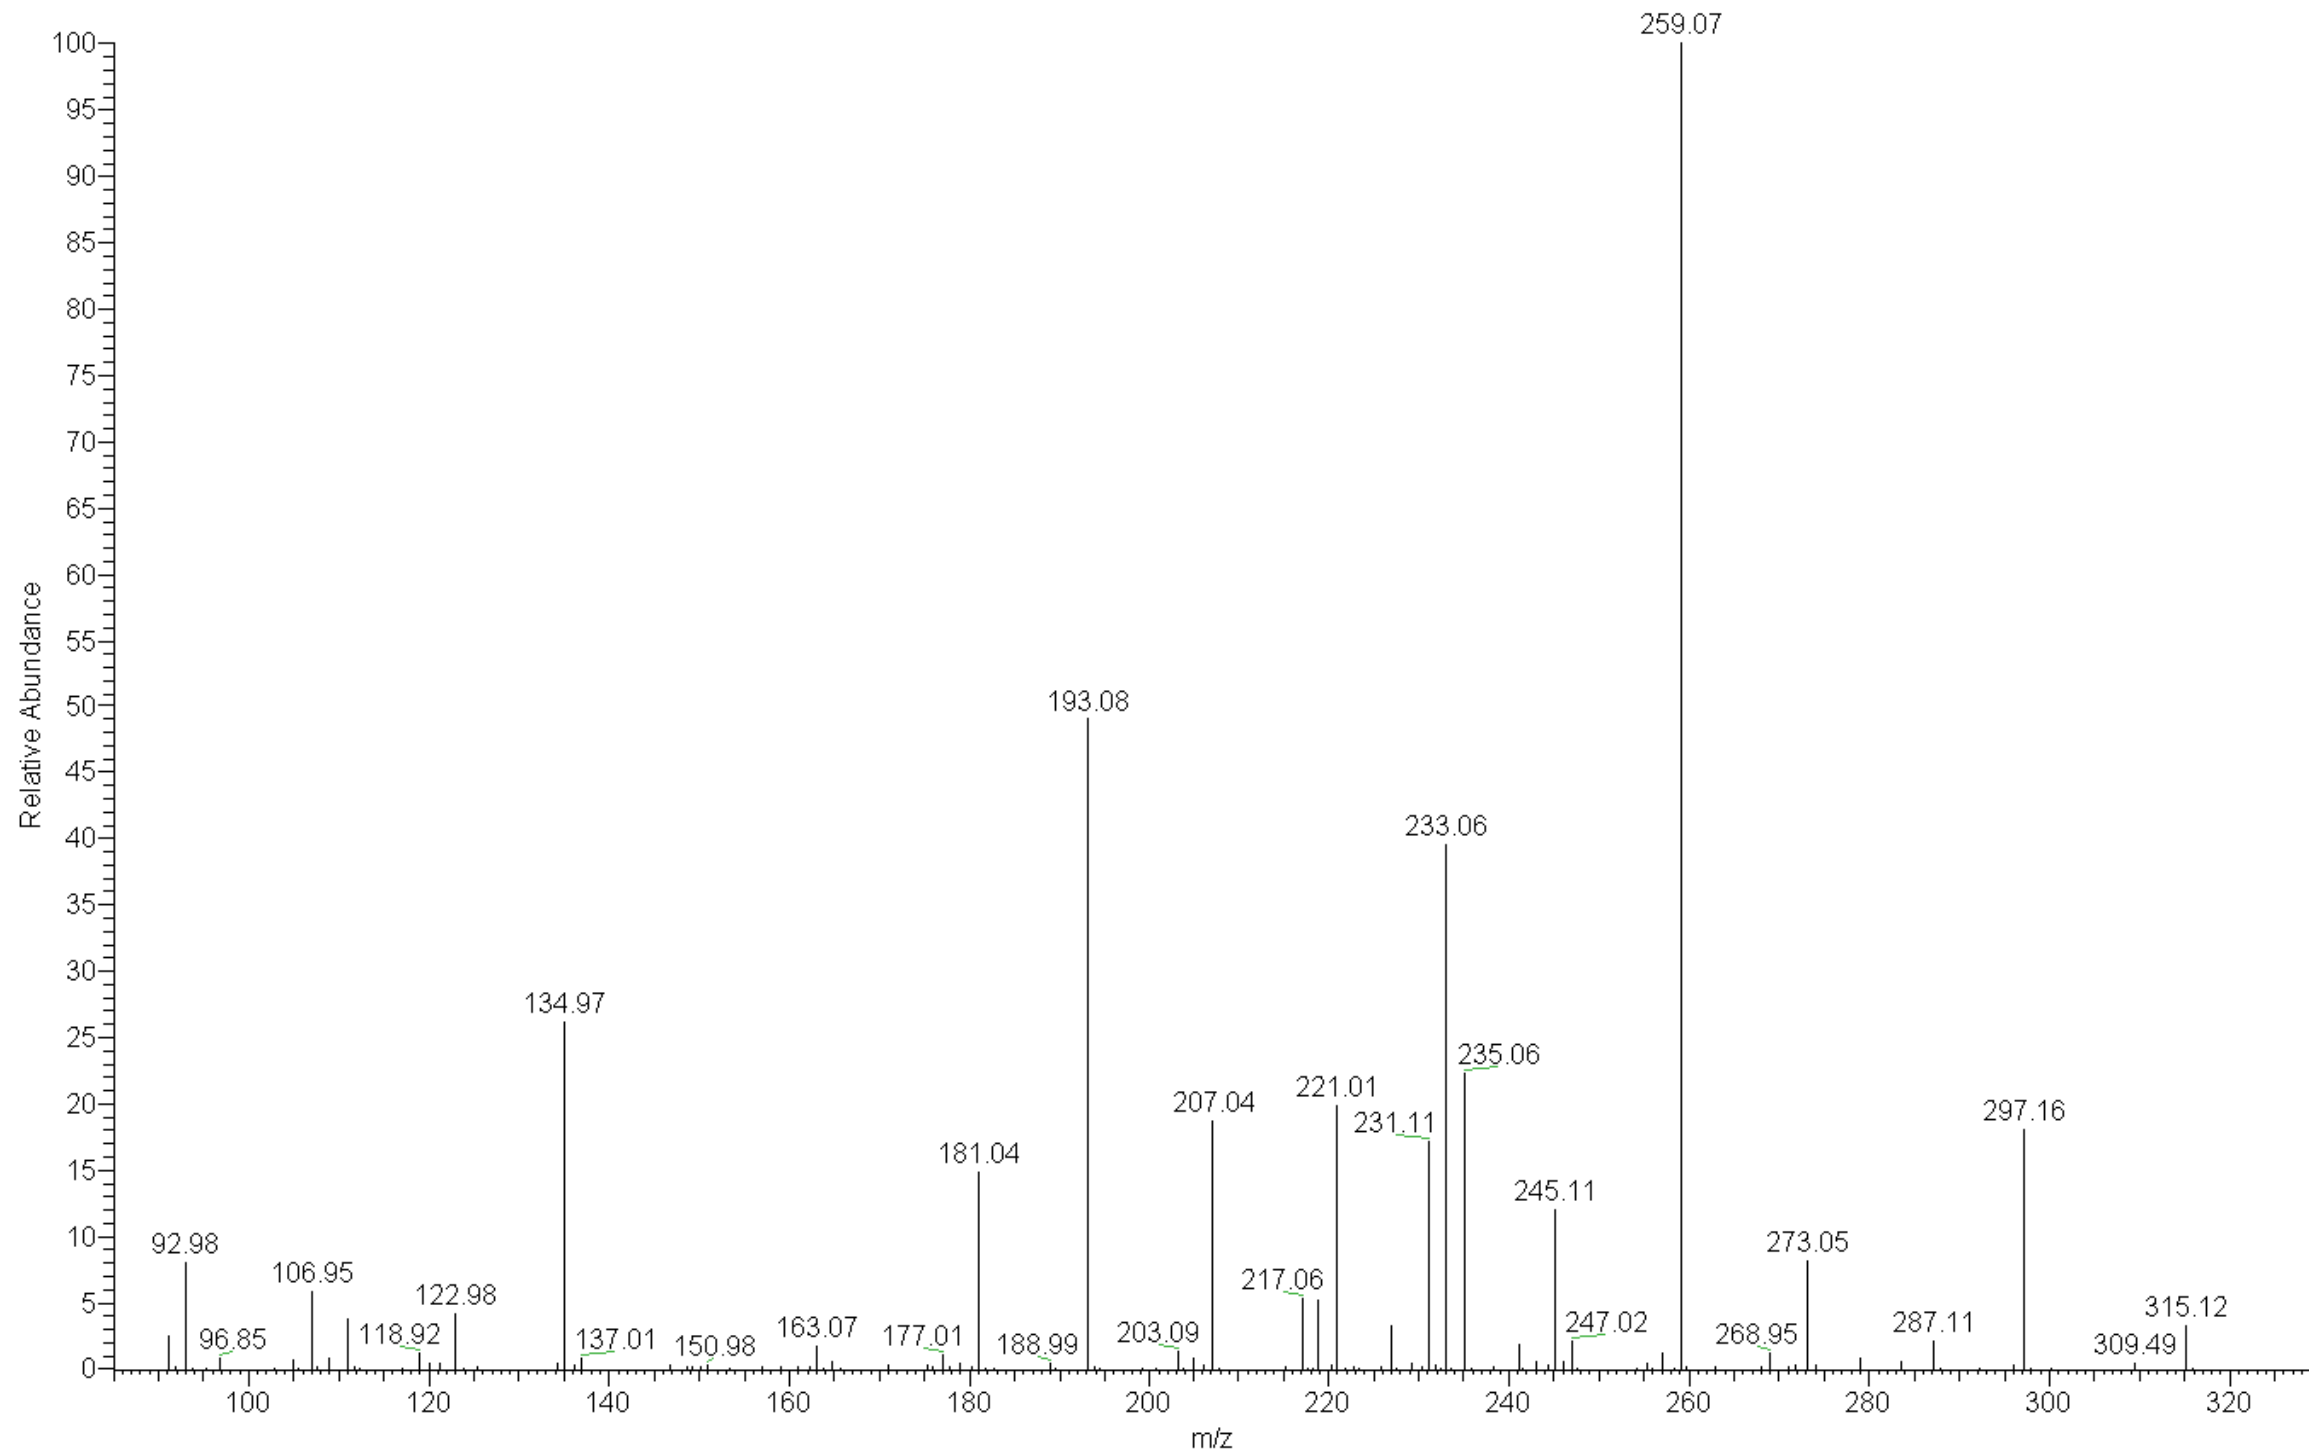

Peak 9

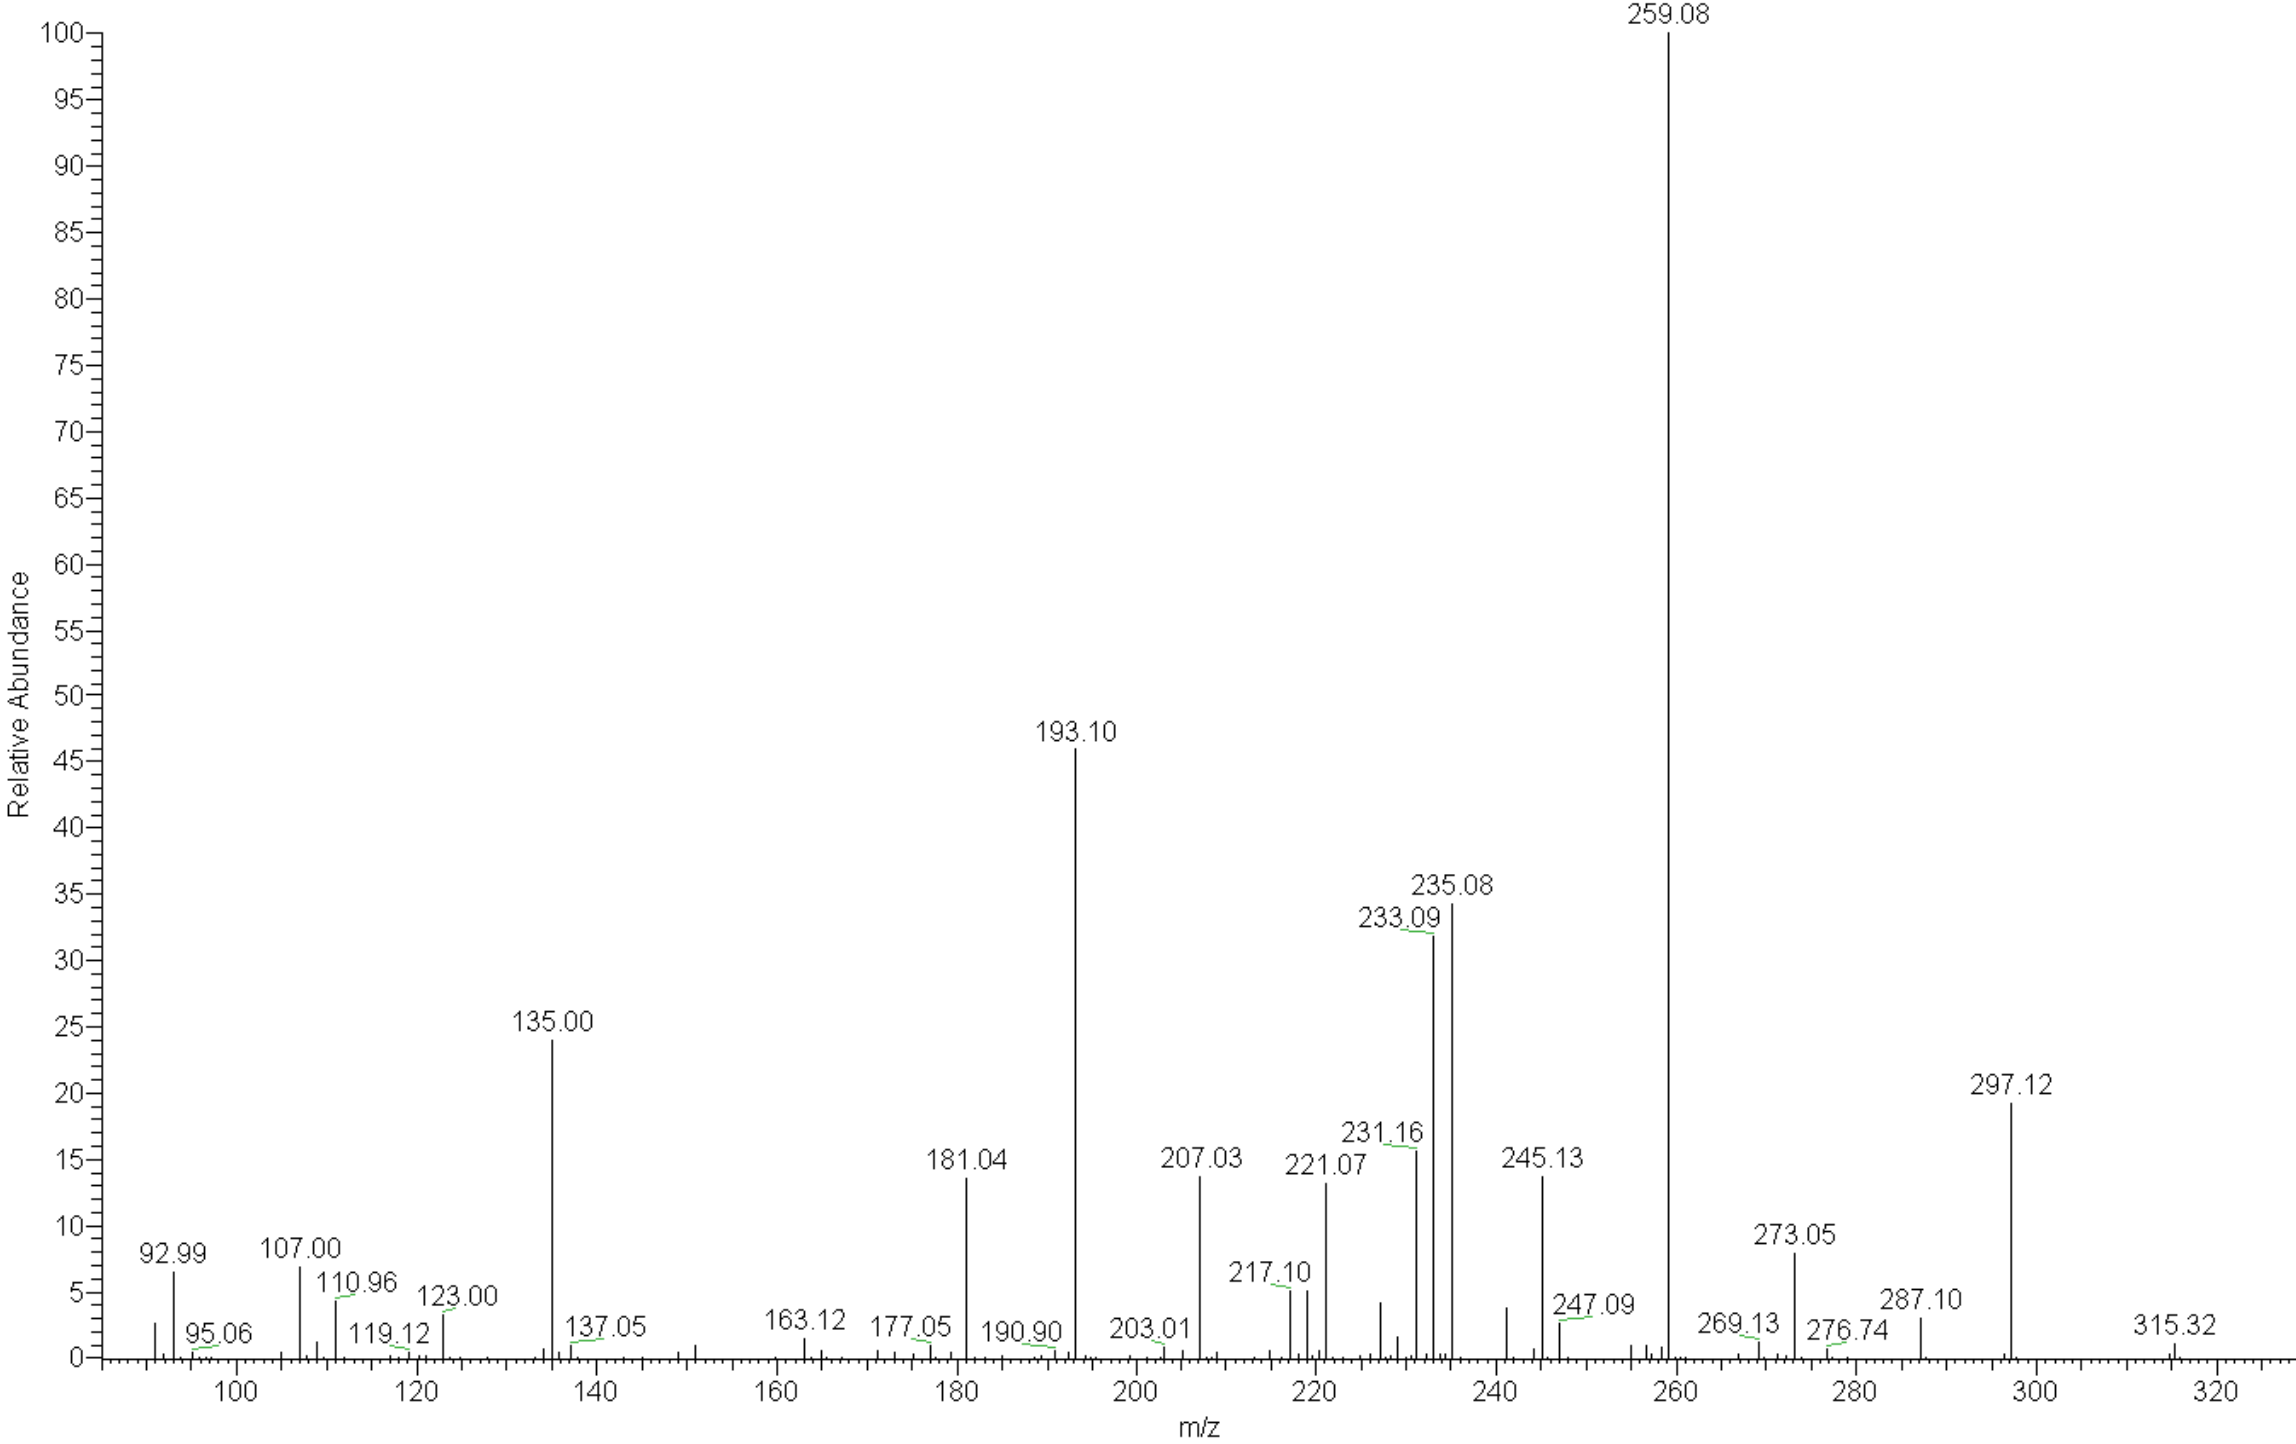

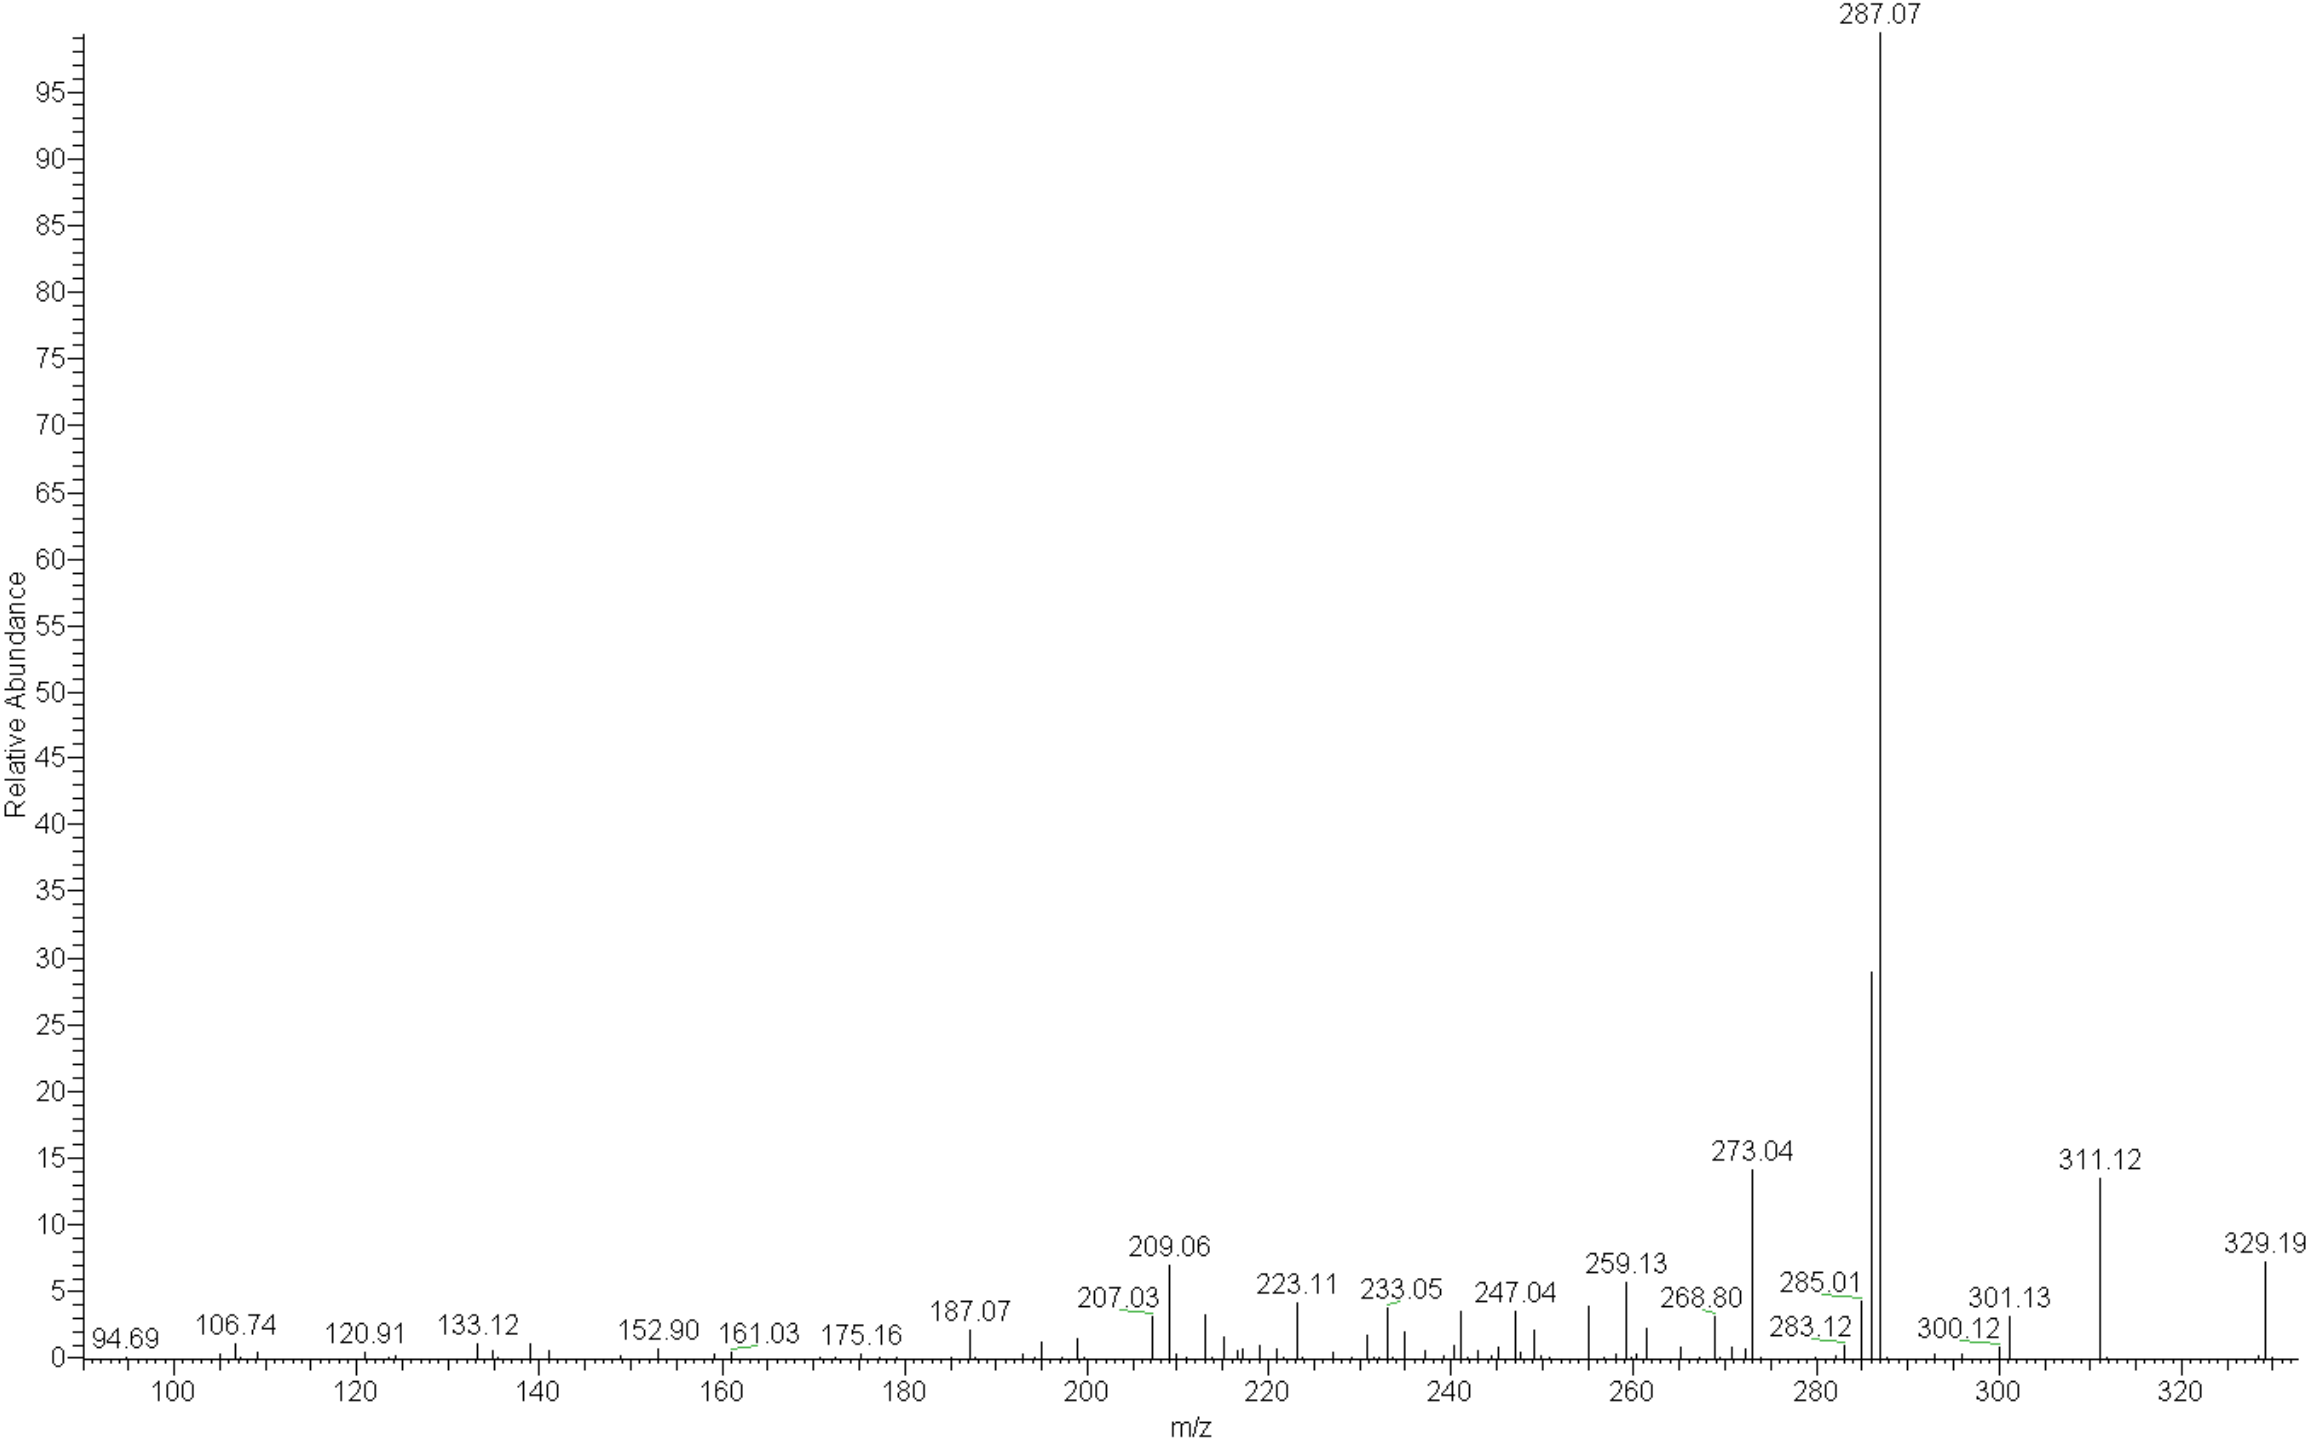

Δ- THC

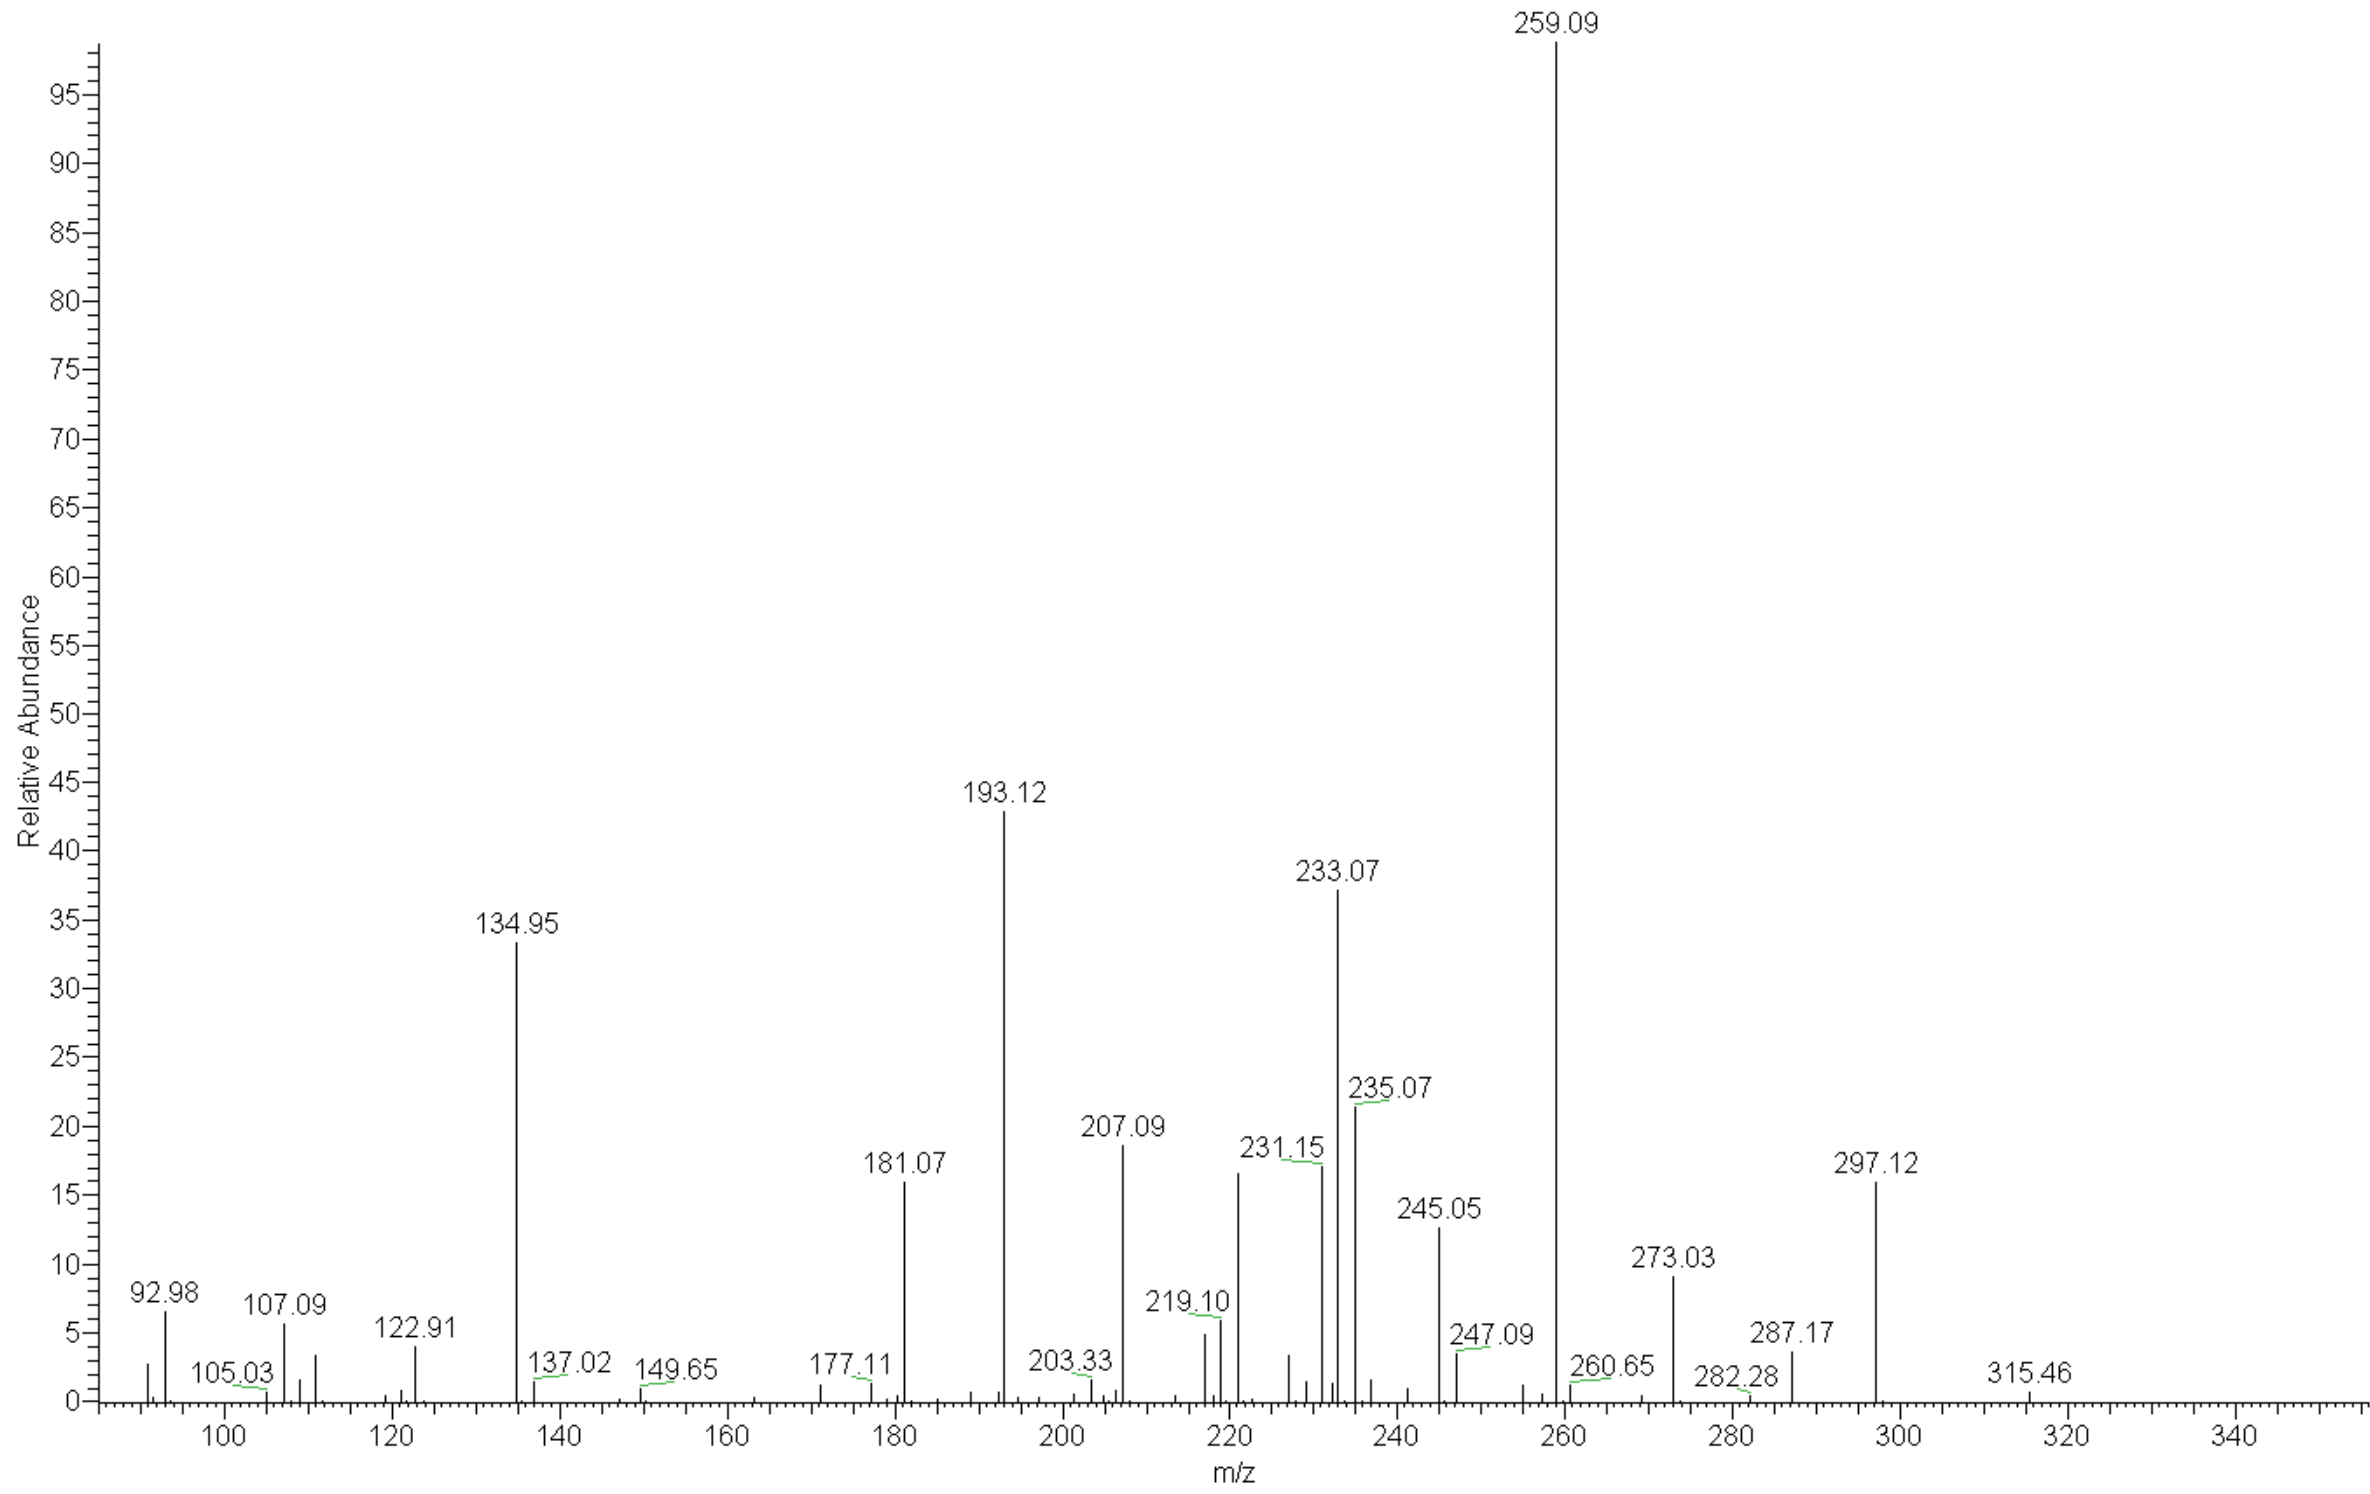

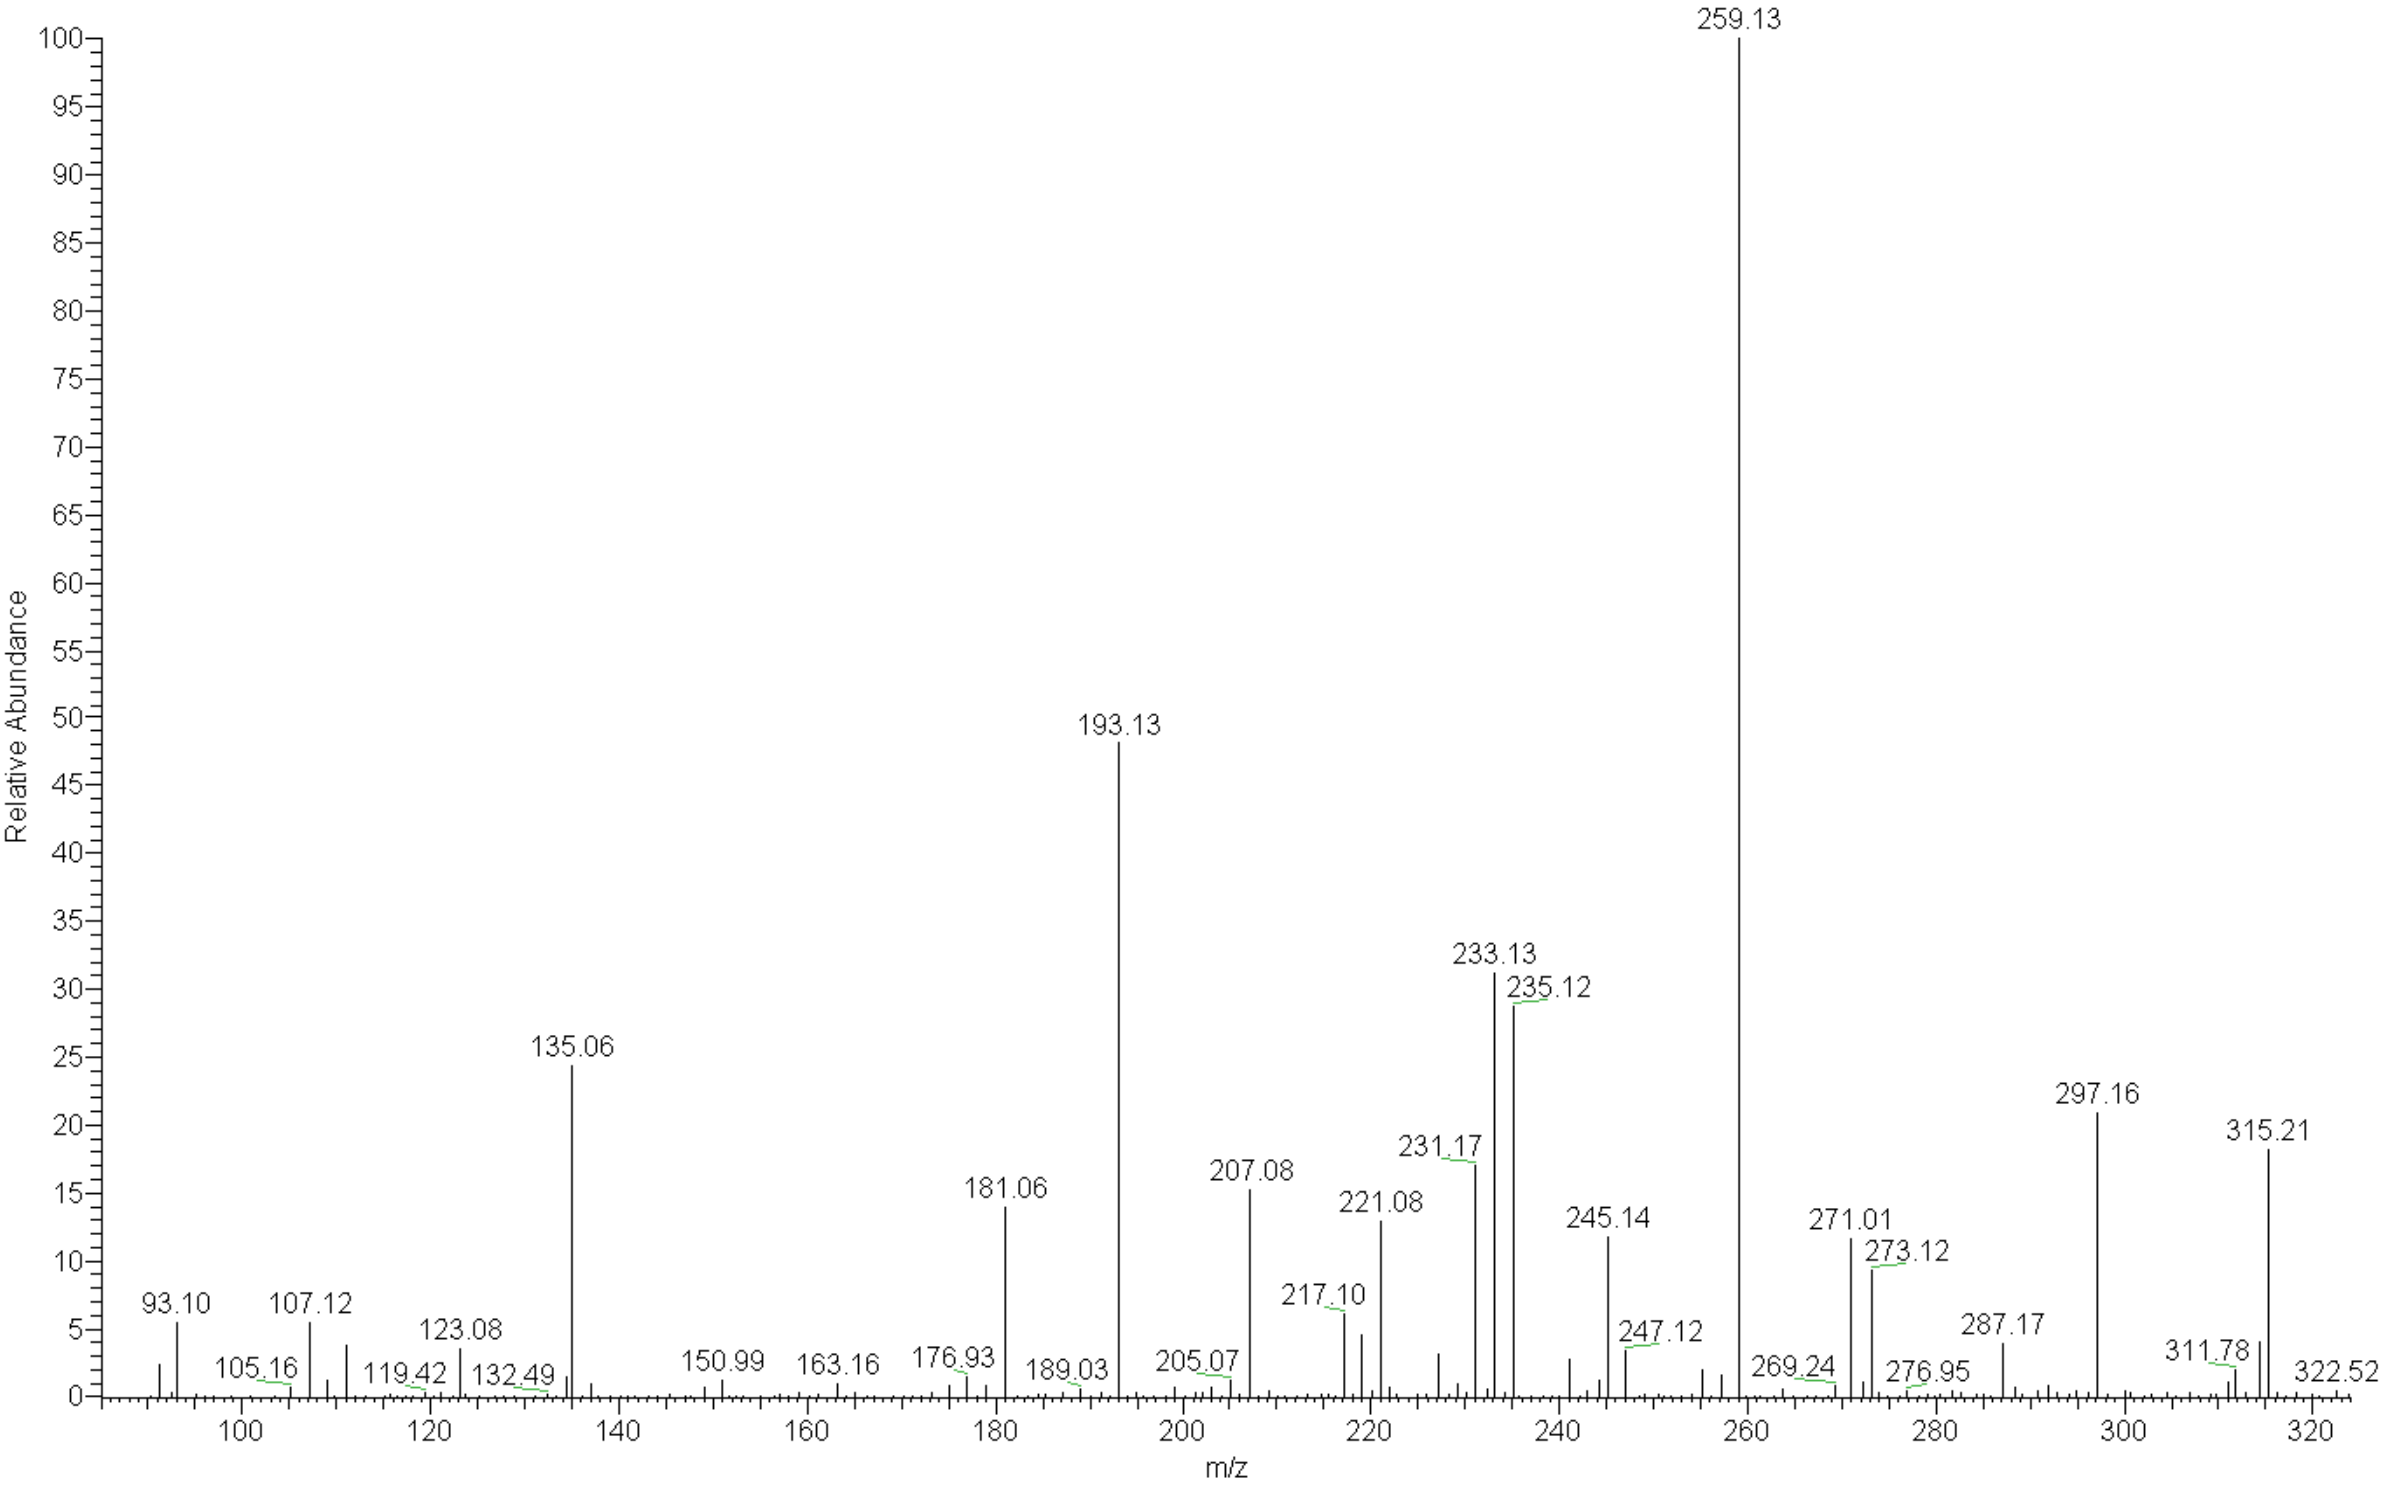

Supplement: s1 [file s1]
